# Supplementary material for: Hematopoietic plasticity mapped in Drosophila and other insects
Source: eLife. 2022 Aug 3;11:e78906. doi: 10.7554/eLife.78906 (PMC9348853; doi:10.7554/eLife.78906)
Supplement: Figure 1—source data 1. — Complete lists of differentially expressed genes. [file elife-78906-fig1-data1.xlsx]

## Sheet: Lamellocytes
Lamellocytes				scRNAseq: fold enrichment ("FC") and % representation
Characteristic genes				Cattenoz			Tattikota			Fu	Leitão			Cho			Girard		Summary	Mean
Symbol	Name	FlyBase ID	Description	Clust	FC	%	Clust	FC	%	Clust	Clust	Source	Rank	Clust	FC	%	Clust	Fold	Class	n	FC
αTub85E	α-Tubulin at 85E	FBgn0003886	α-Tubulin at 85E, Attachment cells of chordotonal organs and developing muscles.	LM1/2	17.5391	99.35	LM2	34.5915	95.6	LM	LAM	Fig4s1	12	LM2	15.5791	93.7			LM	5	21.1433	1
atilla	atilla	FBgn0032422	L1 lamellocyte antigen. GPI-Anchored membrane protein. Ly6 superfamily. Mutant resistant to Metarhizium (Lu-2015).	LM1/2	18.7923	97.85	LM2	31.2226	78.7	LM	LAM	Fig4s1	3	LM2	15.1404	100			LM	5	20.7107	2
CG1208	CG1208	FBgn0037386	Major facilitator, sugar transporter-like	LM1/2	13.7487	92.1	LM2	34.3536	65.1		LAM	Fig4s1	33	LM2	10.77	39.7			LM	4	17.1982	4
βTub60D	β-Tubulin at 60D	FBgn0003888	Microtubules. Expressed in developing muscles.	LM1/2	6.14364	100	LM2	52.1846	78.7		LAM	Fig4s1	1	LM2	12.1953	100			LM	4	15.7538	5
CG15347	CG15347	FBgn0030040	GPI-Anchored membrane protein. Ly6 superfamily. Atilla (distant) homolog.	LM1/2	16.2721	99.4	LM2	22.1892	79.4		LAM	Fig4s1	4	LM2	10.124	100	MZ		LM	4	15.4044	6
CG33225	CG33225	FBgn0053225	Serine pseudoprotease.	LM1/2	10.8288	96.8	LM2	9.28574	80.9	LM				LM2	4.34355	98.4	MZ		LM	4	7.58718	8
Treh	Trehalase	FBgn0003748	Trehalase, trehalose catabolism.	LM1/2	14.5432	94.2	LM2	8.58945	70.6		LAM	Fig4s1	19	LM2	3.41037	79.4			LM	4	7.52447	9
PPO3	Prophenoloxidase 3	FBgn0261363	Lamellocyte phenoloxidase. Melanization of capsules. Prophenoloxidase 59, PPO3, Dox-A3 Diphenol oxidase A3	LM1/2	4.77665	65.45	LM2	18.8594	76.1		LAM	Fig4s1	17	LM2	3.69847	63.5			LM	4	6.93252	11
RapGAP1	Rap GTPase activating protein 1	FBgn0264895	Rapgap1, a GTPase activating protein for rap1, a component of Drosophila pole plasm.	LM1/2	10.4228	97.75	LM2	8.17393	83.1		LAM	Fig4s1	9	LM2	3.76748	95.2	PL2		LM	4	6.84683	12
CG2556	CG2556	FBgn0030396	Uncharacterized insect protein	LM1/2	6.92917	87.85	LM2	10.1523	69.1		LAM	Fig4s1	2	LM2	4.32249	82.5			LM	4	6.72451	13
Drip	Drip	FBgn0015872	Aquaporin. Water transport (Malpighian tubules)	LM1/2	11.4056	93.55	LM2	7.02896	57.4		LAM	Fig4s1	14	LM2	3.45509	68.3			LM	4	6.51863	14
mthl4	methuselah-like 4	FBgn0034219	G-protein coupled receptor. Response to starvation?	LM1	5.5617	90.8	LM2	7.51511	76.5	LM	LAM	Fig4s1	15	LM2	6.35474	100			LM	5	6.42807	16
ItgaPS4	Integrin αPS4 subunit	FBgn0034005	α-integrin. Lamellocyte marker.	LM1/2	10.7708	87.65	LM2	5.38196	20.2	LM	LAM	Fig4s1	20	LM2	4.09525	63.5			LM	5	6.19187	20
shot	short stop	FBgn0013733	Spectraplakin family cytoskeletal linker molecule, binds actin, microtubules and scaffold proteins, certain signalling factors and calcium.	LM1/2	9.69175	98.6	LM2	8.47525	82.4	LM	LAM	Fig4s1	6	LM2	2.83485	87.3			LM	5	6.15217	21
CAP	CAP	FBgn0033504	Cbl-Associated Protein. Genetic interaction with integrin and talin genes. Cytoskeleton.	LM1/2	6.63594	79.35	LM2	4.65609	59.2	LM	LAM	Fig4s1	31				PSC		LM	4	5.55855	22
Fit1	Fermitin 1	FBgn0035498	Probably involved in integrin-mediated cellular adhesion. Mutant sensitive to Vibrio infection (Berkey-2009).	LM1/2	7.9303	99	LM2	5.42862	77.6		LAM	Fig4s1	18	LM2	3.13406	92.1			LM	4	5.12895	24
hebe	hebe	FBgn0033448	Uncharacterized protein. Unique to Drosophila. Affects life span. Mutant resistant to Metarhizium (Lu-2015).	LM1/2	7.64062	96.1	LM2	3.84385	57		LAM	Fig4s1	13	LM2	3.36845	93.7	MZ		LM	4	4.62496	25
Tret1-1	Trehalose transporter 1-1	FBgn0050035	Trehalose transporter. Major facilitator, sugar transporter-like	LM1/2	6.69992	67.75	LM2	6.92945	54.8		LAM	Fig4s1	21	LM2	1.86973	41.3			LM	4	4.42774	27
cher	cheerio	FBgn0014141	Filamin. F-actin crosslinking. Organize cytoskeleton. Lamellocyte-specific in hemocytes.	LM1/2	7.29393	98.75	LM2	4.58465	89.7	LM	LAM	Fig4s1	11	LM2	2.33663	90.5			LM	5	4.27516	29
rhea	rhea	FBgn0260442	Talin. Adhesive functions of integrins. Crosslinks extracellular matrix-linked integrins to the cytoskeleton.	LM1/2	7.43338	99.95	LM2	4.00494	77.9		LAM	Fig4s1	16	LM2	2.18466	87.3			LM	4	4.02151	30
mys	myospheroid	FBgn0004657	Integrin βPS, myospheroid (CG1560 gene symbol:mys FBgn0004657 (GO:0007427 tracheal cell migration (sensu Insecta)) (GO:0007517 muscle development) (GO:0007391 dorsal closure) (GO:0008014 calcium-dependent cell adhesion molecule) (GO:0007160 cell-matrix adhesion) (GO:0016340 calcium-dependent cell-matrix adhesion) (GO:0008305 integrin complex) (GO:0007417 central nervous system development) (GO:00…	LM1/2	4.1372	99.8	LM2	5.4395	89		LAM	Fig4s1	30	LM2	2.31604	98.4			LM	4	3.7354	35
Cam	Calmodulin	FBgn0000253	Calcium-binding messenger protein. Interacts with kinases or phosphatases.	LM1/2	3.91677	100	LM2	4.61043	100		LAM	Fig4s1	5	LM2	2.85359	100			LM	4	3.72123	38
wun2	wunen-2	FBgn0041087	Lipid phosphate phosphatase, an enzyme with an active site predicted to face extracellularly. It is required for germ cell migration and survival, acting partially redundantly with its paralog wun.	LM1/2	4.96324	66.5	LM2	3.92189	54	LM	LAM	Fig4s1	23	LM2	2.32652	68.3			LM	5	3.56442	39
Eb1	Eb1	FBgn0027066	Microtubule end-binding protein, controls the plus end of growing microtubules. Regulates interactions of microtubules with the cell cortex, mitotic kinetochores, and cellular organelles.	LM1/2	4.19582	99.75	LM2	3.57759	80.9		LAM	Fig4s1	44	LM2	2.88934	96.8			LM	4	3.51346	41
C3G	C3G guanyl-nucleotide exchange factor	FBgn0259228	Guanyl-nucleotide exchange factor. Binds to SH3 domain of Crk. Transduces signals from Crk to activate RAS.	LM1/2	4.33262	95.9	LM2	2.79837	64.3	LM	LAM	Fig4s1	35				PL2		LM	4	3.48199	44
CG31729	CG31729	FBgn0051729	Endocytosis, phospholipid translocation.	LM1	6.10175	98.1	LM2	3.27428	54		LAM	Fig4s1	32	LM2	1.83117	63.5			LM	4	3.31971	46
pod1	pod1	FBgn0029903	Crosslinks both actin and microtubules and controls the targeting of axons.	LM1	4.65559	98.7	LM2	3.09569	60.7		LAM	Fig3s2		LM2	2.22601	84.1			LM	4	3.17751	52
βTub97EF	β-Tubulin at 97EF	FBgn0003890	One of five β-tubulin paralogs. This beta-tubulin stabilizes microtubules.	LM1/2	3.6071	94.75	LM2	3.36096	71.7		LAM	Fig4s1	46	LM2	2.54457	88.9	CC		LM	4	3.13626	58
LamC	Lamin C	FBgn0010397	Nuclear lamina, a fibrous layer on the nucleoplasmic side of the inner nuclear membrane	LM1/2	3.90669	88.1	LM2	3.04972	74.6	LM	LAM	Fig4s1	26	LM2	2.16472	96.8	PSC		LM	5	2.95454	67
CG43340	CG43340	FBgn0263077	FYVE-related domain, Zn finger protein, involved in development.	LM1/2	4.66065	94	LM2	2.58171	56.2		LAM	Fig4s1	45	LM2	1.80376	77.8	IZ		LM	4	2.7894	75
CG8312	CG8312	FBgn0037720	PH-like phosphotyrosine-binding domain.	LM1	3.61278	85.7	LM2	3.12659	53.3		LAM	Fig4s1	41	LM2	1.8382	57.1			LM	4	2.74854	76
stac	staccato	FBgn0266719	Secretory lysosome-mediated lumen fusion.	LM1	3.94139	84.3	LM2	1.62432	18	LM				LM2	1.5891	44.4			LM	4	2.16683	105
CG14610	CG14610	FBgn0037477	Aspartate aminotransferase (AAT) superfamily. Antisense to non-coding CR42738. Unique to Drosophila, only one homolog: CG12883				LM2	44.7947	68		LAM	Fig4s1	10	LM2	9.27747	66.7			LM	3	20.3858	3
lncRNA:CR44948	CR44948	FBgn0266253	Uncharacterized non-coding, 5' upstream of CG33494.				LM2	25.8775	62.1		LAM	Fig4s1	43	LM2	7.76104	39.7			LM	3	14.1717	7
CG5835	CG5835	FBgn0038682	Uncharacterized single-pass transmembrane protein				LM2	9.57239	56.6		LAM	Fig4s1	8	LM2	4.11604	50.8			LM	3	6.27697	18
lncRNA:CR44316	long non-coding RNA:CR44316	FBgn0265375	Long non-coding RNA.				LM2	7.34222	61.4		LAM	Fig4s1	50	LM2	5.30387	88.9			LM	3	6.24037	19
CG34330	CG34330	FBgn0085359	Uncharacterized small transmembrane(?) protein. Unique to Drosophila	LM1	12.9426	95.4	LM2	3.57948	21.3					LM2	3.14526	27			LM	3	5.26219	23
Myo31DF	Myosin 31DF	FBgn0086347	Class I myosin. Cell motility, cytokinesis and trafficking.	LM1	6.99723	99.7	LM2	2.94591	75		LAM	Fig4s1	48				IZ		LM	3	4.54018	26
CG13117	CG13117	FBgn0032140	Uncharacterized, unique to Drosophila.	LM1	4.71537	98.1	LM2	4.32355	96.3					LM2	2.84801	100	PL2		LM	3	3.87227	32
Ac78C	Adenylyl cyclase 78C	FBgn0024150	Adenylyl cyclase, detection of chemical stimulus involved in sensory perception of sweet taste. Sucrose, trehalose, caffeine.	LM1/2	5.91461	97.55	LM2	4.03943	60.7					LM2	2.26051	71.4	PL2		LM	3	3.77993	34
CG12655	CG12655	FBgn0031080	Uncharacterized transmembrane protein, unique to Drosophila.	LM1	10.5006	94.3	LM2	1.88397	24.3					LM2	2.28489	52.4			LM	3	3.5622	40
Adk1	Adenylate kinase 1	FBgn0022709	ATP + AMP → 2 ADP	LM1/2	4.22889	79.45	LM2	4.38437	49.6					LM2	2.33652	36.5			LM	3	3.5121	42
Rhp	Rhophilin	FBgn0026374	HR1 rho-binding domain.	LM1/2	4.57742	89.65	LM2	2.67022	48.5		LAM	Fig4s1	42						LM	3	3.4961	43
axed	axundead	FBgn0035708	BTB/Kelch-associated; ubiquitin protein ligase binding. Protein catabolism.				LM2	4.44314	62.9		LAM	Fig4s1	40	LM2	2.46023	68.3			LM	3	3.30622	47
Rap1	Rap1 GTPase	FBgn0004636	Regulates hemocyte migration (Siekhaus-2010). Mutant sensitive to Metarhizium (Lu-2015).	LM1/2	4.31802	99.6	LM2	2.5143	52.2		LAM	Fig4s1	22						LM	3	3.29497	48
Vinc	Vinculin	FBgn0004397	Mechanoeffector of cell-cell and cell-extracellular matrix adhesion.	LM1/2	4.23295	94	LM2	2.48761	54.4		LAM	Fig4s1	49						LM	3	3.24498	49
Syb	Synaptobrevin	FBgn0003660	Synaptobrevin. Member of synaptobrevin/vesicle-associated membrane protein (VAMP) family. Neurotransmitter release and cell viability.	LM1/2	3.15984	96.3	LM2	3.70954	91.5					LM2	2.45531	100			LM	3	3.06453	60
twf	twinfilin	FBgn0038206	Actin-binding protein, structurally related to tsr. Inhibits actin filament assembly.				LM2	3.64599	65.4		LAM	Fig4s1	25	LM2	2.5396	92.1			LM	3	3.04292	61
CG33056	CG33056	FBgn0053056	O-acetyl-ADP-ribose deacetylase 1-like. Deacetylates O-acetyl-ADP ribose, a signaling molecule. Homologs include insect virus proteins	LM1/2	4.54042	88.95	LM2	2.82892	51.5					LM2	2.01258	63.5			LM	3	2.95681	66
bves	bves	FBgn0031150	Cell adhesion molecule. Blood vessel/epicardial substance (bves). In Humans, present in skeletal and cardiac muscle and epithelia. Mutant sensitive to Metarhizium (Lu-2015). Cell adhesion molecule, down-regulated by Grk/EFGR signalling.	LM1	7.68136	97.1	LM2	1.96027	37.9					LM2	1.5953	36.5			LM	3	2.88535	70
kune	kune-kune	FBgn0033032	Septate junction organization and tracheal tube size control.	LM1	5.7732	96	LM2	1.77482	31.6					LM2	2.16247	60.3			LM	3	2.80871	73
sigmar	salivary glands marred	FBgn0034894	Responsive to the egr TNF ligand. JNK signaling modulation, cytoskeletal remodeling, autophagy.	LM1	3.70896	92.1	LM2	2.67962	64.3					LM2	1.93703	74.6			LM	3	2.68012	82
Frl	Formin-like, CG43986 (= #4593)	FBgn0267795	Together with Cdc42, involved in establishment of planar cell polarity. Positive contributions to engulfment receptor Draper signaling.	LM1/2	3.93574	99.15	LM2	2.15902	94.5					LM2	2.23478	92.1			LM	3	2.66792	83
Itgbn	Integrin betanu subunit	FBgn0010395	β-integrin. Wasp encapsulation (Howell-2012), muscle cell homeostasis.	LM1/2	4.07054	87.4	LM2	1.93326	20.2					LM2	2.26832	71.4			LM	3	2.61346	84
aru	arouser	FBgn0029095	Adaptor protein. Interacts with Egfr and PI3K pathways.	LM1/2	4.0125	89	LM2	2.49365	56.2					LM2	1.77315	69.8			LM	3	2.60815	85
Rac2	Rac2	FBgn0014011	Hemocyte activation (Williams-2005).	Rel	1.28667	79.7	LM2	3.36205	88.2		LAM	Fig4s1	36	LM2	1.95026	96.8			LM	3	2.56064	87
ATP8A	ATPase 8A	FBgn0259221	Phospholipid transporting type IV P-ATPase, flippase.	LM1/2	2.98515	81.8	LM2	2.66934	48.9					LM2	2.08365	57.1			LM	3	2.55112	88
sfl	sulfateless	FBgn0020251	N-deacetylation and the N-sulfation of glucosamine (GlcNAc) of glycosaminoglycan. Required for FGF receptor signaling.	LM1	7.17389	96.9	LM2	1.5332	19.9					LM2	1.45981	27			LM	3	2.5228	89
Sep4	Septin 4	FBgn0259923	Cytoskeleton, forms septin rings.	LM1	3.90775	83.5	LM2	2.58008	42.6					LM2	1.48891	25.4			LM	3	2.46685	90
Myo28B1	Myosin 28B1	FBgn0040299	Unconventional myosin, plays vital roles in cell adhesion and phagocytosis. A high duty ratio motor.	LM2	3.49523	70.3	LM2	2.6689	44.5					LM2	1.59793	39.7			LM	3	2.46106	91
αTub84B	α-Tubulin at 84B	FBgn0003884	α-Tubulin. Negative regulation of Imd signaling (Kleino-2005).				LM2	2.91848	97.4		LAM	Fig4s1	28	LM2	2.07294	100			LM	3	2.45964	92
CG10947	CG10947	FBgn0032857	S-adenosylmethionine-dependent lysine methyltransferase	LM1	4.65537	89.9	LM2	1.87694	27.6					LM2	1.49268	25.4			LM	3	2.35391	97
Adgf-A	Adenosine deaminase-related growth factor A	FBgn0036752	Deaminase, regulates the level of extracellular adenosine. Important for regulation of systemic metabolism, especially during stress and infection.	LM1/2	3.00594	88.3	LM2	2.27655	73.2					LM2	1.77933	76.2			LM	3	2.30058	99
Sr-CIV	Scavenger receptor class C, type IV	FBgn0031547	Scavenger receptor-CIV (Lazzaro 2005, GenBank: AY865097.1). Concanavalin A-like lectin/glucanase domain. MAM domain.	LM1/2	2.85088	65.45	LM2	2.5266	53.3					LM2	1.6415	61.9	PL2		LM	3	2.27817	100
rdgB	retinal degeneration B	FBgn0003218	Phosphatidylinositol transporter. Sensory percrption of light and smell.				LM2	2.83543	52.9		LAM	Fig4s1	29	LM2	1.36606	39.7	PSC		LM	3	1.96809	114
CG12947	CG12947	FBgn0037753	Uncharacterized.	LM2	2.84316	56.3	LM2	1.40225	17.3					LM2	1.65736	39.7			LM	3	1.8765	119
CG9336	CG9336	FBgn0032897	Ly6 superfamily. Atilla homolog.	LM1	34.9443	99.3	LM2	1.54063	9.6										LM	2	7.33732	10
CG14072	CG14072	FBgn0032318	Uncharacterized protein, accessory gland-specific. Unique to genus Drosophila.	LM1	20.5413	93.5	LM2	2.04984	12.9										LM	2	6.48894	15
Zasp52	Z band alternatively spliced PDZ-motif protein 52	FBgn0265991	Zasp protein, binds α-actinin. Localizes to muscle attachment sites and Z-discs in muscle cells, and cortically in non-muscle cells.	LM1	6.32537	99.7					LAM	Fig3s2							LM	2	6.32537	17
Gdap2	Gdap2	FBgn0042135	Sec14p-like lipid-binding domain. Found in secretory proteins, such asphosphatidylinositol transfer protein (Sec14p), and in lipid regulated proteins such as RhoGAPs, RhoGEFs and neurofibromin	LM1	6.40084	95.9	LM2	3.0004	54								MZ		LM	2	4.38236	28
Jupiter	Jupiter	FBgn0051363	Positive regulation of microtubule polymerization. Binds to all microtubule populations.	LM1	3.45036	99.7	LM2	4.56549	90.4										LM	2	3.96895	31
CG9328	CG9328	FBgn0032886	Regulation of cell growth?				LM2	3.78979	68.8		LAM	Fig4s1	27				PSC		LM	2	3.78979	33
AdoR	Adenosine receptor	FBgn0039747	G protein-coupled receptor. Activates cAMP and calcium signaling. Mediates a systemic metabolic switch during immune response.	LM1	3.72399	96.2				LM									LM	2	3.72399	36
CG42675	CG42675	FBgn0261561	Zinc finger C2HC domain protein				LM2	3.72203	47.8		LAM	Fig4s1	37						LM	2	3.72203	37
CG10126	CG10126	FBgn0038088	Calcyphosin-like protein. Calcium-binding.	robo2			LM2	3.05835	55.5					LM2	3.63039	71.4			LM	2	3.33212	45
CG33494	CG33494	FBgn0053494	Uncharacterized, melanogaster subgroup.	LM1/2	3.4143	99.3	LM2	3.04447	96.7										LM	2	3.22408	50
Swip-1	Swiprosin-1	FBgn0032731	Swiprosin-1, EFh, EF-hand, calcium binding motif, expressed in fusion competent myoblasts and macrophages of the embryo (CG10641 gene symbol:CG10641 FBgn0032731 (GO:0005509 calcium ion binding))	LM1	3.94685	99.7	LM2	2.62193	86										LM	2	3.21688	51
scaf	scarface	FBgn0033033	Serine pseudoprotease, negative-feedback regulator of JNK signaling.	LM1/2	3.5951	67.75	LM2	2.80613	35.7										LM	2	3.17621	53
glob1	globin 1	FBgn0027657	Hemoglobin. O2-dependent metabolism.	LM1	4.45804	85.9	LM2	2.24775	34.2								X		LM	2	3.16553	54
plx	pollux	FBgn0261261	Rab GAP. Cell adhesion mediated by integrins.	LM1/2	6.95297	88.55	LM2	1.42854	13.2										LM	2	3.15161	55
Chd64	Chd64	FBgn0035499	Calponin-like. Juvenile hormone response.	LM1/2	6.36003	99.9	LM2	1.5616	99.6										LM	2	3.15148	56
dally	division abnormally delayed	FBgn0263930	Heparan sulfate proteoglycan of the glypican family. Co-receptor for FGFs, dpp, wg, hh and upd1.	LM1	5.61996	93.2	LM2	1.7543	31.2								PSC		LM	2	3.13992	57
CG18754	CG18754	FBgn0042106	Serine protease, SPE homolog (also easter & MP1).				LM1	3.08417	20.8		LAM	Fig3s2							LM	2	3.08417	59
sra	sarah	FBgn0086370	Calcipressin. Regulates calcineurin activity.	LM1	4.78785	92.1	LM2	1.9202	50.7										LM	2	3.0321	62
Fim	Fimbrin	FBgn0024238	Calponin homology. Actin filament network formation	robo2	1.8535	97.3	LM2	3.02535	80.5		LAM	Fig4s1	34						LM	2	3.02535	63
CG9932	CG9932	FBgn0262160	Zn finger sequence-specific DNA binding proteins. Transcriptional regulation.				LM2	4.36901	73.5					LM2	2.07932	93.7	IZ		LM	2	3.01406	64
tx	taxi	FBgn0263118	Transcription factor, affects cell adhesion by regulating the expression of mys.				LM2	2.75356	48.5					LM2	3.19023	87.3	CC		LM	2	2.96386	65
promL	prominin-like	FBgn0026189	Intracellular protein transport	LM1	3.97822	94.2	LM2	2.15356	69.9										LM	2	2.927	68
mthl2	methuselah-like 2	FBgn0035623	G-protein coupled receptor. Response to starvation?				LM2	3.43454	86					LM2	2.42909	90.5	X		LM	2	2.88839	69
MESK2	Misexpression suppressor of KSR 2	FBgn0043070	Ras signaling?	LM1	4.19727	99.8	LM2	1.93453	71.3								PSC		LM	2	2.84952	71
Act42A	Actin 42A	FBgn0000043	Cytoplasmic actin; transcribed throughout development; one of two actin genes transcribed in Kc cells.	PL2	1.2939	99.9	LM2	2.82279	100		LAM	Fig4s1	38						LM	2	2.82279	72
mew	multiple edematous wings	FBgn0004456	Integrin alpha subunit, receptor for the extracellular matrix protein laminin. Cell migration, adhesion and differentiation.	PL2	1.33123	70.3	LM2	2.79976	51.5		LAM	Fig3s2					PSC		LM	2	2.79976	74
Act5C	Actin 5C	FBgn0000042	Cytoplasmic actin; transcribed throughout development; one of two actin genes transcribed in Kc cells.	robo2	1.34278	100	LM2	2.74519	100		LAM	Fig4s1	7						LM	2	2.74519	77
AnxB9	Annexin B9	FBgn0000083	Phospholipid-binding. Required for multivesicular body.	LM1	2.91913	99	LM2	2.57293	96										LM	2	2.74057	78
CG31219	CG31219	FBgn0051219	Serine protease, SPE homolog (also easter & MP1).				LM1	3.23434	55.8					LM2	2.27259	69.8			LM	2	2.71115	79
Esyt2	Extended synaptotagmin-like protein 2 ortholog (H. sapiens)	FBgn0266758	Endoplasmic reticulum-plasma membrane tethering, synaptic vesicle exocytosis.	LM1/2	3.68659	86.95	LM2	1.98363	75										LM	2	2.70422	80
Ras85D	Ras oncogene at 85D	FBgn0003205	Ras superfamily GTPase, acting downstream of several cell signals, most notably from Receptor Tyrosine Kinases, to regulate tissue growth and development.	LM1	3.36596	98.7	LM2	2.1366	78.3										LM	2	2.68173	81
Sema1b	Semaphorin 1b	FBgn0016059	Short-range signaling protein. Targeting the plexin receptors. Negative chemotaxis.	LM1	3.25077	96.6								LM2	2.04635	73			LM	2	2.57919	86
Gβ13F	G protein β-subunit 13F	FBgn0001105	G protein β subunit. Regulating the Wnt pathway.	LM1	2.80024	100	LM2	2.12798	98.2										LM	2	2.44108	93
CG18557	CG18557	FBgn0031470	Serine pseudoprotease. Clip-like (?) domain.				LM1	1.71144	11.5					LM2	3.48064	77.8			LM	2	2.44068	94
CG10232	CG10232	FBgn0039108	Serine protease, SPE homolog (also easter & MP1). Exported.	LM1	4.03772	84.6								LM2	1.46188	25.4			LM	2	2.42954	95
QC	Glutaminyl cyclase	FBgn0052412	Protein modification: Generates pyroglutamic acid from N-terminal glutamine.	ImpL2	1.90234	14.3	LM2	2.41073	38.6		LAM	Fig4s1	39				PP		LM	2	2.41073	96
CG12133	CG12133	FBgn0033469	Serine protease, SPE homolog (also easter & MP1).				LM1	2.60058	27.4					LM2	2.04504	39.7			LM	2	2.30614	98
Adf1	Adh transcription factor 1	FBgn0284249	MADF-BESS domain transcription factor. May regulate not only Adh expression but also other genes.				LM2	2.18691	50					LM2	2.34611	71.4			LM	2	2.26511	101
CG17841	CG17841	FBgn0028480	Transmembrane protein, likely target of peroxisome proliferator-activated receptor gamma (PPAR-gamma). Mouse ortholog is related to obesity.				LM2	2.4595	55.5					LM2	2.0649	76.2			LM	2	2.25358	102
Spn88Eb	Serpin 88Eb	FBgn0038299	Serine protease inhibitor.				LM1	1.94599	57.7					LM2	2.59208	92.1			LM	2	2.24592	103
CG7956	CG7956	FBgn0038890	Phosphoinositide polyphosphatase (Sac family) domain, InsP3 5-phosphatase, inositol polyphosphate-5-phosphatase F isoform 1 [Homo sapiens] (CG7956 gene symbol:CG7956 FBgn0038890 )	vir1	1.3259	17.9	LM2	3.0787	54.8					LM2	1.60604	58.7			LM	2	2.22363	104
ifc	infertile crescent	FBgn0001941	Sphingolipid delta4-desaturase, ceramide biosynthesis.				LM2	2.55116	82					LM2	1.83516	92.1			LM	2	2.16374	106
NKAIN	Na,K-ATPase Interacting	FBgn0085442	Regulation of sodium ion transport.				LM2	2.25773	51.8					LM2	2.03632	82.5			LM	2	2.14417	107
Dgk	Diacyl glycerol kinase	FBgn0085390	Protein kinase C-activating G-protein coupled receptor signaling pathway				LM2	2.51381	45.2					LM2	1.70473	55.6			LM	2	2.07011	108
Ptp61F	Protein tyrosine phosphatase 61F	FBgn0267487	Negative Regulator of JAK-STAT, Insulin, EGF and PVF Signaling Pathways.				LM2	2.25766	43.8					LM2	1.86161	60.3			LM	2	2.05009	109
CalpA	Calpain-A	FBgn0012051	Cleaves the NF-κB inhibitor Cact and the cell cycle regulator CycB. Hemocytes.				LM2	2.35696	53.3					LM2	1.77735	61.9			LM	2	2.04674	110
CG12112	CG12112	FBgn0030048	Uncharacterized.				LM2	2.40502	55.5					LM2	1.69871	85.7			LM	2	2.02124	111
CG16710	CG16710	FBgn0039101	Serine protease, SPE homolog (also easter & MP1). Exported.				LM1	2.00526	27.3					LM2	2.02012	57.1			LM	2	2.01267	112
krz	kurtz	FBgn0040206	β-arrestin, internalization of G protein coupled receptors, Notch, receptor tyrosine kinase, Hedgehog, and Toll.				LM2	2.41633	52.9					LM2	1.64343	50.8			LM	2	1.99275	113
Gprk2	G protein-coupled receptor kinase 2	FBgn0261988	Serine/threonine kinase, modulates G-protein coupled receptors. Regulator of Toll signaling (Valanne-2010).				LM2	2.30062	52.6					LM2	1.68125	77.8			LM	2	1.9667	115
parvin	parvin	FBgn0052528	Calponin homolog. Reinforces integrin-matrix adhesion. Cell adhesion and actin cytoskeleton organisation.				LM2	2.25313	65.8					LM2	1.70039	69.8	CC		LM	2	1.95735	116
ens	ensconsin	FBgn0264693	Microtubule-associated protein, required for kinesin-1. Microtubule motor activity, centrosome separation, nuclear positioning and skeletal muscle development.				LM2	2.18355	61.4					LM2	1.7516	77.8			LM	2	1.95569	117
GstE2	Glutathione S transferase E2	FBgn0063498	Glutathione S transferase. Detoxification.				LM2	1.93956	39.7					LM2	1.9101	74.6	IZ		LM	2	1.92478	118
galectin	galectin	FBgn0031213	Concanavalin A-like lectin.				LM2	2.22839	47.8					LM2	1.51664	44.4	X		LM	2	1.83839	120
CG9149	CG9149	FBgn0035203	Acetyl-CoA C-acyltransferase. Fatty acid beta-oxidation?				LM2	2.14854	52.2					LM2	1.57112	60.3	X		LM	2	1.83728	121
CG6983	CG6983	FBgn0035896	Uncharacterized protein. Homolog in humans. Mutant resistant to Metarhizium (Lu-2015).				LM2	1.70668	35.3					LM2	1.96364	73			LM	2	1.83066	122
Klp98A	Kinesin-like protein at 98A	FBgn0004387	Plus end-directed microtubule motor protein. Regulation of autophagosome formation, fusion and positioning, and required for normal localization of Rab14.				LM2	1.90058	41.2					LM2	1.76281	57.1	PL2		LM	2	1.8304	123
Pfdn4	Prefoldin 4	FBgn0035603	Transfers target proteins to cytosolic chaperonin (c-CPN). Protein folding.				LM2	1.9425	55.1					LM2	1.63474	79.4			LM	2	1.78199	124
Ady43A	Ady43A	FBgn0026602	Carbohydrate/purine kinase				LM2	1.99939	33.8					LM2	1.50045	30.2			LM	2	1.73205	125
Lnpk	Lunapark	FBgn0033309	Endoplasmic reticulum tubular network organization.				LM2	1.95222	44.9					LM2	1.48233	57.1	X		LM	2	1.70113	126
Irk1	Inwardly rectifying potassium channel 1	FBgn0265042	K+ channel involved in transepithelial ion transport.				LM2	1.85004	54.8	CAH				LM2	1.54304	76.2			LM	2	1.68958	127
Uvrag	UV-resistance associated gene	FBgn0032499	Autophagy and vesicle trafficking. Atg6 and class C vaculoar protein sorting complexes. Forms a PI3K(III) complex. Receptor downregulation, cell polarity.				LM2	2.00777	40.1					LM2	1.38198	34.9			LM	2	1.66574	128
CG43179	CG43179	FBgn0262808	Similar to N-terminal of gd (gastrulation defective).				LM2	1.7195	27.2					LM2	1.51862	39.7			LM	2	1.61594	129
Pfdn6	Prefoldin 6	FBgn0036918	Protein folding. Transfers proteins to cytosolic chaperonin (c-CPN).				LM2	1.6838	61.4					LM2	1.54554	79.4			LM	2	1.61319	130
Pfdn1	Prefoldin 1	FBgn0031776	Prefoldin/GimC family molecular chaperone.				LM2	1.73239	54.8					LM2	1.49028	76.2			LM	2	1.60678	131
CG43103	CG43103	FBgn0262563	Peptide, 2 Cys.				LM2	1.71588	18.8					LM2	1.38528	27			LM	2	1.54174	132
Epac	Exchange protein directly activated by cAMP	FBgn0085421	Ras-like guanine nucleotide exchange factor. Regulation of Rap protein signal transduction				LM2	1.60459	22.1					LM2	1.40234	41.3			LM	2	1.50006	133
CG31710	CG31710	FBgn0051710	Uncharacterized protein, genus Drosophila.				LM2	1.58466	37.5					LM2	1.41512	41.3	X		LM	2	1.49749	134
CenB1A	Centaurin β 1A	FBgn0039056	ADP-ribosylation factor GTPase activating protein (ArfGAP).				LM2	1.40324	34.2					LM2	1.40744	47.6			LM	2	1.40534	135
Cpes	Ceramide phosphoethanolamine synthase	FBgn0025335	Ceramide phosphoethanolamine (CPE) biosynthesis.				LM2	1.38732	37.5					LM2	1.40438	46			LM	2	1.39582	136
CG34423	CG34423	FBgn0085452	Mitochondrial ATPase inhibitor.	LM1	16.92	99.1	PM5												lm	1	16.92	137
Drat	Death resistor Adh domain containing target	FBgn0033188	Zn-dependent ADH-like family. Effector of ethanol-induced apoptosis. Response to hypoxia	LM1	9.39063	95.5													lm	1	9.39063	138
AANATL2	Arylalkylamine N-acyltransferase-like 2	FBgn0031791	Formation of long-chain N-acylserotonins and N-acydopamines. Inactivation of neurotransmitters, cuticle sclerotization, and melatonin biosynthesis	LM1	7.28793	89.8													lm	1	7.28793	139
lncRNA:CR43432	long non-coding RNA:CR43432	FBgn0263380	Long non-coding RNA. Uncharacterized non-coding, 3' antisense of Ocho. Accessory gland-specific				LM2	5.48374	18.8										lm	1	5.48374	140
Tomosyn	Tomosyn	FBgn0030412	Rab GTPase activator. Synaptic vesicle cycle protein.	LM1	5.33495	95.7													lm	1	5.33495	141
CG12065	CG12065	FBgn0030052	Lateral inhibition?	LM1/2	4.84112	97.5	PM12												lm	1	4.84112	142
LIMK1	LIM-kinase1	FBgn0283712	Serine/threonine kinase. Stabilizer of the actin cytoskeleton by inactivating tsr.	LM1	4.81589	90.6													lm	1	4.81589	143
Atg8a	Autophagy-specific gene 8a	FBgn0052672	Ubiquitin-like protein, conjugated to phosphatidylethanolamine and anchored into the membrane of autophagosomes.	LM1	4.77965	98.6													lm	1	4.77965	144
Spn88Ea	Serpin 88Ea	FBgn0028984	Serine protease inhibitor. Inhibits Toll signaling and melanization.	LM1	4.76472	93.2													lm	1	4.76472	145
CG42792	CG42792	FBgn0261925	Fat body-specific small peptide, 1 Cys.											LM1	4.68408	35			lm	1	4.68408	146
drongo	drongo	FBgn0020304	ArfGAP. GTPase activating protein for ARF family GTPases.	LM1	4.54015	92.5											PSC		lm	1	4.54015	147
CG34253	CG34253	FBgn0085282	Uncharacterized protein.	LM1	4.49398	87.5													lm	1	4.49398	148
CG8086	CG8086	FBgn0032010	Mucin	LM1	4.20275	84.6													lm	1	4.20275	149
Sp212	Serine-peptidase 212	FBgn0053329	Serine protease, gastrulation defective-related. Exported.	LM1	4.14857	84.5													lm	1	4.14857	150
Cyp9f2	Cyp9f2	FBgn0038037	Cytochrome P450. Metabolism of insect hormones and breakdown of synthetic insecticides.	LM1	4.01284	89													lm	1	4.01284	151
Frl	Formin-like, CG32138 (= #6404)	FBgn0267795	Together with Cdc42, involved in establishment of planar cell polarity. Positive contributions to engulfment receptor Draper signaling.	LM1/2	3.93574	99.15											PSC		lm	1	3.93574	152
CG2747	CG2747	FBgn0037541	Armadillo-type fold. Endocytosis, retrograde transport, endosome to Golgi.	LM1	3.7762	92.5													lm	1	3.7762	153
asRNA:CR42738	antisense RNA:CR42738	FBgn0261702	Antisense RNA. Antisense to CG14610.				LM2	3.44599	36.8										lm	1	3.44599	154
CG33462	CG33462	FBgn0053462	Serine protease. Exported.											LM1	3.31061	79.4			lm	1	3.31061	155
Myo61F	Myosin 61F	FBgn0010246	Microvillus of the gut apical brush border. Provides resistance against oral infection by bacterial pathogens	LM1	3.27826	99.1											PL2		lm	1	3.27826	156
CG17760	CG17760	FBgn0033756	G-protein alpha subunit. G-protein coupled receptor signaling.				LM2	2.92576	61								PL2		lm	1	2.92576	157
CG32066	CG32066	FBgn0052066	Protein of unknown function (DUF1394).				LM2	2.85427	62.5								CC		lm	1	2.85427	158
CG44085	CG44085	FBgn0264894	Spa2/Sph1 protein. MAP-kinase scaffold.											LM2	2.84666	71.4			lm	1	2.84666	159
Gapdh2	Glyceraldehyde 3 phosphate dehydrogenase 2	FBgn0001092	Glyceraldehyde-3-phosphate dehydrogenase. Glycolysis, glucose homeostasis.				LM2	2.80538	79								PSC		lm	1	2.80538	160
r	rudimentary	FBgn0003189	Initial steps of pyrimidine biosynthesis.											LM2	2.79677	100			lm	1	2.79677	161
CG7497	CG7497	FBgn0036742	G protein-coupled receptor. Prostaglandin receptor-like.				LM2	2.70631	38.6										lm	1	2.70631	162
Rab35	Rab35	FBgn0031090	Rab family member of Ras small GTPases. Regulate vesicle trafficking including cargo selection, vesicle budding, transport, docking and targeting.				LM2	2.56494	72.4										lm	1	2.56494	163
Tpi	Triose phosphate isomerase	FBgn0086355	Glycolysis.				LM2	2.52399	41.9								PSC		lm	1	2.52399	164
Rab11	Rab11	FBgn0015790	Rab type Ras-like GTPase. Regulator of endomembrane trafficking; exocytosis, endocytosis and membrane recycling.				LM2	2.46431	97.1										lm	1	2.46431	165
CG33111	CG33111	FBgn0053111	Chromosome segregation ATPase-like??				LM2	2.46335	47.1										lm	1	2.46335	166
Pka-C1	Protein kinase, cAMP-dependent, catalytic subunit 1	FBgn0000273	Serine/threonine kinase. Pleiotropic. Hedgehog signaling.				LM2	2.4345	57.4								X		lm	1	2.4345	167
chic	chickadee	FBgn0000308	Actin monomer binding protein. Provides the major immediate pool of ATP-actin monomers.	PL2			LM2	2.3981	100					PM4					lm	1	2.3981	168
capt	capulet	FBgn0261458	Actin binding, negative regulation of actin filament assembly.				LM2	2.38814	85.7								PL2		lm	1	2.38814	169
glec	gliolectin	FBgn0015229	Lectin. Heterophilic cell-cell adhesion. Glia-glia and glia-neuron interactions				LM2	2.38436	46.3								CC		lm	1	2.38436	170
tsr	twinstar	FBgn0011726	Actin polymerization or depolymerization. Cofilin - actin-depolymerizing and actin-severing protein - cell mobility.				LM2	2.34891	100										lm	1	2.34891	171
RhoGAP18B	Rho GTPase activating protein at 18B	FBgn0261461	Rho GTPase activating protein, actin cytoskeleton organization.	robo2			LM2	2.34652	67.3					LM2					lm	1	2.34652	172
CG43124	CG43124	FBgn0262587	Serine pseudoprotease, exported.				LM2	2.26237	68								CC		lm	1	2.26237	173
CG32264	CG32264	FBgn0052264	actin cytoskeleton reorganization. Mutant resistant to Metarhizium (Lu-2015).											LM2	2.25032	87.3	CC		lm	1	2.25032	174
Snx17	Sorting nexin 17	FBgn0032191	Phosphatidylinositol binding sorting nexin homolog, may be a regulatory gene involved in receptor protein degradation.											LM2	2.20559	71.4	X		lm	1	2.20559	175
stck	steamer duck	FBgn0020249	PINCH adapter. Integrin-dependent cell adhesion and signaling, regulates JNK and epithelial migration in concert with Ras suppressor.				LM2	2.19993	59.9										lm	1	2.19993	176
CG4511	CG4511	FBgn0037843	Biosynthesis of queuosine: modified nucleoside that is present in certain tRNAs.				LM2	2.19101	68.4								CC		lm	1	2.19101	177
Tdc1	Tyrosine decarboxylase 1	FBgn0259977	Generates tyramine, a diuretic factor secreted by the Malpighian tubules.				LM2	2.18915	30.1										lm	1	2.18915	178
Arp3	Actin-related protein 3	FBgn0262716	Arp2/3 complex. Regulation of actin polymerization, together with activating nucleation-promoting factor (NPF). Formation of branched actin networks				LM2	2.18881	80.1										lm	1	2.18881	179
wun	wunen	FBgn0016078	Lipid phosphate phosphatase, required for germ cell migration and survival, septate junctions in the tracheal system and heart formation.				LM2	2.16431	45.2										lm	1	2.16431	180
Pax	Paxillin	FBgn0041789	Adaptor, couples integrins to the actin cytoskeleton in focal adhesions. Regulates Rac positively and Rho negatively.				LM2	2.15332	61										lm	1	2.15332	181
14-3-3ε	14-3-3ε	FBgn0020238	Ras/MAPK cascade. Antagonizes FoxO to control growth, apoptosis and longevity (Nielsen 2008). Embryonic hatching, germ cell migration, gonad formation, wing venation and eye development.				LM2	2.15118	99.6										lm	1	2.15118	182
Syx1A	Syntaxin 1A	FBgn0013343	Vesicular docking protein (t-SNARE).Docking and fusion of neurotransmitter-filled vesicles with presynaptic membrane.				LM2	2.13185	69.5										lm	1	2.13185	183
Rab1	Rab1	FBgn0285937	Small GTPase. Regulates endoplasmic reticulum to Golgi and intra Golgi trafficking. Notch signaling, cell migration, autophagy and cytokinesis.				LM2	2.05635	81.2										lm	1	2.05635	184
ics	icarus	FBgn0028546	Ras suppressor 1, adapter, interacting with integrin effector protein stck.				LM2	2.04386	64.3										lm	1	2.04386	185
Map205	Microtubule-associated protein 205	FBgn0002645	Binds and stabilizes microtubules.	PL2			LM2	1.97328	75.7										lm	1	1.97328	186
nuf	nuclear fallout	FBgn0013718	Cytoplasmic, coiled-coil protein. Adaptor between Rab11 and motor proteins in the recycling endosome pathway.				LM2	1.97201	54.8								PL2		lm	1	1.97201	187
Pak3	Pak3	FBgn0044826	Ser/Thr kinase. Regulates actin cytoskeletal organization, downstream of Rac GTPases. Myoblast fusion, synapse development, wound healing and border cell migration.				LM2	1.96537	76.1										lm	1	1.96537	188
CG1943	CG1943	FBgn0037468	Microtubule-associated protein Jupiter/Hematological and neurological expressed 1				LM2	1.95727	81.2										lm	1	1.95727	189
Snx6	Sorting nexin 6	FBgn0032005	Retrograde vesicle transport, endosome to Golgi.				LM2	1.95383	75										lm	1	1.95383	190
AdamTS-A	ADAM metallopeptidase with thrombospondin type 1 motif A	FBgn0286071	Secreted matrix metalloprotease, involved in cell migration.				LM2	1.9326	24.6										lm	1	1.9326	191
Ilk	Integrin linked kinase	FBgn0028427	Pseudokinase. Mediates adhesive functions of integrins together with stck and parvin.	vir1			LM2	1.92522	59.9					LM2					lm	1	1.92522	192
Rab6	Rab6	FBgn0015797	Rab family small Ras-like GTPase, involved in vesicle trafficking. Mutant sensitive to fungal infection (Jin 2008).				LM2	1.9083	63.6										lm	1	1.9083	193
p38a	p38a MAP kinase	FBgn0015765	MAP kinase.				LM2	1.90577	48.5										lm	1	1.90577	194
Whamy	WHAMM and JMY related	FBgn0037750	Cell motility. Actin polymerase promoting myoblast fusion, macrophage cell motility and sensory organ development				LM2	1.88494	32										lm	1	1.88494	195
Exn	Ephexin	FBgn0261547	Rho-GEF, required in hemocytes for encapsulation of Leptopilina (Howell 2012).				LM2	1.8726	36										lm	1	1.8726	196
asRNA:CR46093	antisense RNA:CR46093	FBgn0267762	Uncharacterized non-coding RNA. Antisense of BRWD3 (Regulates ecdysone and JAK-STAT signaling pathways and contributes to eye development, cell death and phagocytosis).				PM11							LM1	1.86395	41.9			lm	1	1.86395	197
smash	smallish	FBgn0263346	Uncharacterized, many isoforms. Mutant sensitive to Metarhizium (Lu-2015). Human homologs. DUF4547, DnaJ, Pat1 and LIM domains.				LM2	1.85779	36.8										lm	1	1.85779	198
Debcl	Death executioner Bcl-2	FBgn0029131	Bcl-2/CED-9 family protein involved in regulating apoptosis.				LM2	1.85593	47.8										lm	1	1.85593	199
RhoGDI	RhoGDI	FBgn0036921	Rho protein GDP-dissociation inhibitor. Rho protein signal transduction.				LM2	1.83617	93.8										lm	1	1.83617	200
TBCB	tubulin-binding cofactor B	FBgn0034451	Microtubule assembly, essential for microtubule-associated transport and cell polarity.				LM2	1.82695	54.4										lm	1	1.82695	201
Clic	Chloride intracellular channel	FBgn0030529	Intracellular chloride channel. Blunts sensitivity to alcohol.				LM2	1.82689	80.5										lm	1	1.82689	202
CG5011	CG5011	FBgn0040723	Low-complexity small peptide (PH-rich). Gut-specific.				LM2	1.82086	19.9										lm	1	1.82086	203
raskol	raskol	FBgn0261570	Ras-like GTPase activating protein. Ras GAP. Promotes GTP hydrolysis by Ras subfamily Ras GTPases.				LM2	1.80096	38.2										lm	1	1.80096	204
msn	misshapen	FBgn0010909	Ste20-like MapKKK. Conveys Rac signals to Basket/Jnk. Cytoskeletal remodeling and autophagy.				LM2	1.78135	68.4										lm	1	1.78135	205
Arpc4	Actin-related protein 2/3 complex, subunit 4	FBgn0284255	Cortical actin cytoskeleton organization. Cell adhesion, regulation of cell shape and wound healing.	PL2			LM2	1.77014	57.7					PM4					lm	1	1.77014	206
Mo25	Mo25	FBgn0017572	Asymmetric cell divisions via mira localization. Interacts physically with the kinase Lkb1.				LM2	1.76514	53.3										lm	1	1.76514	207
CG10431	CG10431	FBgn0032730	Zn finger C2H2 transcription factor.				LM2	1.76275	33.1										lm	1	1.76275	208
Rab7	Rab7	FBgn0015795	Acts downstream of Rab 5 to facilitates endosome maturation and fusion with lysosomes. Rabs regulate vesicle trafficking including cargo selection, vesicle budding, transport, docking and targeting.				LM2	1.75617	73.9										lm	1	1.75617	209
Pis	Phosphatidylinositol synthase	FBgn0030670	Phosphatidylinositol synthesis or turnover.				LM2	1.74813	44.5										lm	1	1.74813	210
Lmpt	Limpet	FBgn0261565	Zinc finger, LIM-type transcription factor(?). Necessary for phagocytosis of fungi and bacteria (Jin 2008). Negative effect on food intake in females (Garlapow 2015).				LM2	1.73615	31.2										lm	1	1.73615	211
FER	FER tyrosine kinase	FBgn0000723	Non-receptor tyrosine kinase. Cell adhesion and cytoskeletal reorganisation, modification of adherens junctions.				LM2	1.73349	45.2										lm	1	1.73349	212
Apc	APC-like	FBgn0015589	APC family key negative regulator of Wingless signaling.				LM2	1.72672	33.8										lm	1	1.72672	213
Rop	Ras opposite	FBgn0004574	Regulates SNARE complex assembly and vesicle membrane fusion.				LM2	1.69973	57.4										lm	1	1.69973	214
Ipp	Inositol polyphosphate 1-phosphatase	FBgn0016672	Inositol-1,4-bisphosphate 1-phosphatase. Iynaptic transmission and inositol metabolism regulation.				LM2	1.69809	33.5										lm	1	1.69809	215
Ras64B	Ras oncogene at 64B	FBgn0003206	May be involved in endocytic processes and/or other transport pathways mediated by vesicle trafficking.				LM2	1.68994	46.7										lm	1	1.68994	216
Gli	Gliotactin	FBgn0001987	Gliotactin is a transmembrane protein localized at tricellular junctions. It is necessary for septate junction and permeability barrier formation.				LM2	1.68538	18										lm	1	1.68538	217
hdly	hadley	FBgn0038842	No homolog. Negative regulation of female receptivity, post-mating.				LM2	1.68101	60.3										lm	1	1.68101	218
CG14995	CG14995	FBgn0035497	Paralog of tilB, required for the assembly and/or transport to the cilium of axonemal dynein arms.				LM2	1.68094	29.8										lm	1	1.68094	219
CG33459	CG33459	FBgn0053459	Serine protease. Exported. Related to infection-inducible.											LM1	1.67571	70			lm	1	1.67571	220
flr	flare	FBgn0260049	Arp2/3 complex. Actin Interacting protein 1. Functions with tsr (cofillin) to promote F-actin disassembly.				LM2	1.66589	70.6										lm	1	1.66589	221
aos	argos	FBgn0004569	Secreted EGF antagonist. Inhibitory ligand for Egf receptor.				LM2	1.66412	15.4										lm	1	1.66412	222
CG14894	CG14894	FBgn0038428	Transmembrane transporter. Protein targeting to mitochondrion.				LM2	1.66145	51.1								X		lm	1	1.66145	223
Pof	Painting of fourth	FBgn0035047	Binds nascent RNA from actively transcribed genes. Increases expression. Targets the 4th chromosome and two loci on X.				LM2	1.66083	13.2										lm	1	1.66083	224
cic	capicua	FBgn0262582	HMG-box transcriptional repressor. General sensor of RTK signaling.				LM2	1.6582	49.3								CC		lm	1	1.6582	225
CG42663	CG42663	FBgn0261545	Nck-associated protein 5-like protein involved in determination of lifespan.				LM2	1.63042	31.6								CC		lm	1	1.63042	226
Dhpr	Dihydropteridine reductase	FBgn0035964	Pterin-dependent aromatic amino acid hydroxylation.				LM2	1.62915	39										lm	1	1.62915	227
CG10764	CG10764	FBgn0034221	Serine protease and pseudoprotease domains. Exported.				LM1	1.62314	60.4										lm	1	1.62314	228
Abi	Abelson interacting protein	FBgn0020510	Regulates F-actin formation, modulates Abelson tyrosine kinase activity, Recruits EGFR to the membrane.				LM2	1.62094	53.7										lm	1	1.62094	229
mgr	merry-go-round	FBgn0264694	Protein folding, Required for tubulin stability and spindle and centrosome formation.				LM2	1.61514	47.1										lm	1	1.61514	230
lncRNA:CR43900	long non-coding RNA:CR43900	FBgn0264501	long non-coding RNA, overlaps 5' sense of Calmodulin gene				PM6							LM2	1.61257	50.8			lm	1	1.61257	231
Septin2	Septin 2	FBgn0014029	GTPase which can polymerize to form filaments. Involved in cytokinesis and trafficking. Ring canal.				LM2	1.59842	62.1										lm	1	1.59842	232
GAPcenA	GTPase activating protein and centrosome-associated	FBgn0035879	GTPase activating protein for Rab family GTPase.				LM2	1.58728	34.9										lm	1	1.58728	233
Synj	Synaptojanin	FBgn0034691	Phosphoinositide phosphate (PtdInsP) phosphatase. Uncoating of nascent endocytic vesicles.				LM2	1.58511	31.2										lm	1	1.58511	234
FoxP	Forkhead box P	FBgn0262477	Forkhead box transcription factor. Courtship behavior.				LM2	1.58316	16.2										lm	1	1.58316	235
140up	upstream of RpII140	FBgn0010340	Human complex I assembly factor TIMMDC1-like, mitochondrial.				LM2	1.57106	31.6										lm	1	1.57106	236
Rala	Ras-like protein A	FBgn0015286	Counters apoptotic program. Negative regulator of JNK, positive activator of p38 MAPK. Pvr trafficking and signaling, lymph gland homeostasis (Knævelsrud 2020). Serratia resistance (Cronin 2009).	PL2	1.30974	59.9	LM2	1.56319	56.2										lm	1	1.56319	237
pyr	pyramus	FBgn0033649	A fibroblast growth factor (FGF) and ligand for the FGF receptor heartless (htl). Chemoattractant in directional cell migration, regulating adhesion, differentiation, and cell survival.											LM2	1.55626	42.9	PL2		lm	1	1.55626	238
zye	zye	FBgn0036985	Zona Pellucida Domain Protein (ZPDP), perhaps involved in the localized reorganization of embryonic epidermal cells during morphogenesis (Fernandes 2010).				LM1	1.54643	9										lm	1	1.54643	239
nes	nessy	FBgn0026630	Lysophospholipid acyltransferase. Lipid modification, plasma membrane organization.											LM2	1.53557	50.8	CC		lm	1	1.53557	240
zda	zonda	FBgn0034368	FKBP family immunophillin. FK506-binding protein. Protein folding. Starvation-induced autophagy.				LM2	1.53529	64										lm	1	1.53529	241
P5cr-2	Pyrroline-5-carboxylate reductase-like 2	FBgn0038516	L-proline biosynthesis.	PL3										LM2	1.53055	49.2			lm	1	1.53055	242
CG11426	CG11426	FBgn0037166	Phosphatidate phosphatase.				LM2	1.52318	20.6										lm	1	1.52318	243
CCT6	Chaperonin containing TCP1 subunit 6	FBgn0027329	Hsp60 chaperonin. Interacting with insulin/TOR signaling (Kim and Choi, 2019). ATP-dependent folding of approximately 10% of of newly synthesized proteins.											LM2	1.51536	88.9			lm	1	1.51536	244
Nhe2	Na[+]/H[+] hydrogen exchanger 2	FBgn0040297	Sodium/proton exchanger, maintains cellular pH,				LM2	1.51441	36.8										lm	1	1.51441	245
Or46a	Odorant receptor 46a	FBgn0026388	Odorant receptor, sensitive to 2-methylphenol and phenol (Ray 2014). Expressed in adult palp, but perhaps not antenna (Clyne 1999, Voshall 1999). In larvae??				LM2	1.50526	12.1										lm	1	1.50526	246
Pcyt1	Phosphocholine cytidylyltransferase 1	FBgn0041342	Phosphatidylcholine biosynthesis(?)	vir1										LM2	1.50166	82.5			lm	1	1.50166	247
GramD1B	GRAM domain containing 1B	FBgn0085423	Participates in JAK/STAT signaling.											LM2	1.50055	54			lm	1	1.50055	248
GEFmeso	Guanine nucleotide exchange factor in mesoderm	FBgn0050115	Interacts with Ral and Rho GTPase Cdc42, a key regulator of the actin cytoskeleton (hemocyte migration).				LM2	1.4986	19.9										lm	1	1.4986	249
foxo	forkhead box, sub-group O	FBgn0038197	Foxo.				LM2	1.49843	33.1								CC		lm	1	1.49843	250
rho-6	rhomboid-6	FBgn0032415	Rhomboid-like intramembrave serine protease. Six-pass transmembrane protein. Protein processing. EGF signaling, spitz activation??				LM2	1.49767	23.5										lm	1	1.49767	251
Stim	Stromal interaction molecule	FBgn0045073	Component of the store-operated Ca entry mechanism.				LM2	1.49452	55.5										lm	1	1.49452	252
Atg18b	Autophagy-related 18b	FBgn0032935	Autophagosome assembly.				LM2	1.48467	26.8								CC		lm	1	1.48467	253
Liprin-γ	Liprin-γ	FBgn0034720	Axon targeting				LM2	1.47618	15.4										lm	1	1.47618	254
CG42740		FBgn0261704												LM1	1.47078	25.3			lm	1	1.47078	255
hppy	happyhour	FBgn0263395	MAP4K3 ortholog. Negative regulation of EGFR, positive of Hippo, Tor and JNK signalling pathways.				LM2	1.46961	27.6										lm	1	1.46961	256
Cyt-c-p	Cytochrome c proximal	FBgn0284248	Cytochrome c				LM1	1.46722	68.5										lm	1	1.46722	257
Trc8	TRC8 ring finger protein	FBgn0039668	Zn-binding ubiquitin protein ligase. COP9 signalosome-dependent growth inhibition.											LM2	1.46643	50.8			lm	1	1.46643	258
Pdss2	Decaprenyl diphosphate synthase subunit 2	FBgn0037044	Isoprenoid biosynthesis. EP/EY insertion mutant has fewer sessile hemocytes.				LM2	1.46594	28.3										lm	1	1.46594	259
CG17746	CG17746	FBgn0035425					LM2	1.46481	46										lm	1	1.46481	260
CG31715	CG31715	FBgn0051715					LM2	1.46096	50.7										lm	1	1.46096	261
Khc-73	Kinesin heavy chain 73	FBgn0019968	Kinesin-3 family microtubule-based transport motor. Facilitates endosomal transport.				LM2	1.45886	36										lm	1	1.45886	262
Strica	Ser/Thr-rich caspase	FBgn0033051	Initiator caspase. Programmed cell death.				LM2	1.45667	35.3										lm	1	1.45667	263
SCAR	CG4636	FBgn0041781					LM2	1.45372	61.8										lm	1	1.45372	264
DAAM	Dishevelled Associated Activator of Morphogenesis	FBgn0025641	Formin type actin assembly factor, regulated by Rho GTPases. Mutant sensitive to Metarhizium (Lu-2015).				LM2	1.4518	27.6										lm	1	1.4518	265
CCT7	Chaperonin containing TCP1 subunit 7	FBgn0037632	Hsp60 chaperonin. Interacting with insulin/TOR signaling (Kim and Choi, 2019). Chaperonin Containing TCP-1 (CCT) complex.											LM2	1.44941	88.9			lm	1	1.44941	266
B4	B4	FBgn0023407	Negative regulator of PI3-kinase and insulin signaling.				LM2	1.4488	26.5								PSC		lm	1	1.4488	267
εCOP	Coat Protein (coatomer) ε	FBgn0027496	ER - Golgi vesicle-mediated transport.				LM2	1.44676	50.4								X		lm	1	1.44676	268
Hel89B	Helicase 89B	FBgn0022787	Imd pathway. Acts downstream of DIF and Relish (Yagi-05). SNF2 family chromatin regulator.				LM2	1.44621	29.8										lm	1	1.44621	269
CG32407	CG32407	FBgn0052407	Lipid-binding domain. Related to human motile sperm domain-containing protein 2; a regulator of human monocyte migration.				LM2	1.44485	19.9										lm	1	1.44485	270
CG15117	CG15117	FBgn0034417	Betaglucuronidase/betagalactosidase-like. Glycoside hydrolase, hydrolyzing O-glycosyl compounds. Accessory gland.				LM2	1.43931	23.2										lm	1	1.43931	271
CG10359	CG10359	FBgn0035452	FREP, Fibrinogen-related domain, FReD; C terminal globular domain of fibrinogen, angiopoietin and many insect homologs.				LM2	1.43797	16.9										lm	1	1.43797	272
RhoGAP68F	Rho GTPase activating protein at 68F	FBgn0036257	Modulates transport of Rab4 recycling endosomes back to the cell surface.				LM2	1.4361	54								PL2		lm	1	1.4361	273
CG5704	CG5704	FBgn0026570	Alpha/beta hydrolase fold. Pimeloyl-ACP methyl ester carboxylesterase. Coenzyme transport and metabolism.				LM2	1.43338	29										lm	1	1.43338	274
CG15740	CG15740	FBgn0030340	Uncharacterized protein, low complexity (long Q-rich stretches).				LM1	1.42433	19.3										lm	1	1.42433	275
Alg2	ALG2, α-1,3/1,6-mannosyltransferase	FBgn0035401	Alpha-1,3-mannosyltransferase. Protein glycosylation.				LM2	1.42388	36.4										lm	1	1.42388	276
upd3	unpaired 3	FBgn0053542	Cytokine. Ligand for the JAK/STAT signal transduction pathway. Also JAK/STAT target.											LM2	1.42308	52.4	PL2		lm	1	1.42308	277
AnxB10	Annexin B10	FBgn0000084												LM2	1.40282	58.7			lm	1	1.40282	278
CG13315	CG13315	FBgn0040827	Uncharacterized insect protein.											LM2	1.40247	34.9	IZ		lm	1	1.40247	279
qm	quemao	FBgn0019662					LM2	1.39901	37.9										lm	1	1.39901	280
CG5554	CG5554	FBgn0034914					LM2	1.39722	75.4										lm	1	1.39722	281
ppl	pumpless	FBgn0027945					LM2	1.39592	30.5										lm	1	1.39592	282
CCT3	Chaperonin containing TCP1 subunit 3	FBgn0015019	Hsp60 chaperonin. Interacting with insulin/TOR signaling (Kim and Choi, 2019). Known to play a role, in vitro, in the folding of actin and tubulin.				LM2	1.38853	44.1										lm	1	1.38853	283
CG17660	CG17660	FBgn0031356	Uncharacterized, human transmembrane protein 87B-like.											LM1	1.38815	59.9			lm	1	1.38815	284
CG31220	CG31220	FBgn0051220	Serine protease, SPE homolog (also easter & MP1). NOT exported?!?				LM2	1.38746	9.9										lm	1	1.38746	285
CCT2	Chaperonin containing TCP1 subunit 2	FBgn0030086	Hsp60 chaperonin. Interacting with insulin/TOR signaling (Kim and Choi, 2019).											LM2	1.38583	90.5			lm	1	1.38583	286
btl	breathless	FBgn0285896	Receptor tyrosine kinase, FGF receptor-like. Epithelial cell migration…				LM2	1.3849	15.8										lm	1	1.3849	287
γSnap1	γ Soluble NSF attachment protein 1	FBgn0028552	Soluble N-ethylmaleimide-sensitive-factor-attachment protein (SNAP). Intracellular membrane trafficking, including vesicular transport between ER and Golgi.				LM2	1.3833	31.2										lm	1	1.3833	288
inaE	inactivation no afterpotential E	FBgn0261244	Diacylglycerol lipase. Interacts with TOR and S6K signaling. Arachidonic acid metabolism. Phototransduction and response to oxidative stress.				LM2	1.38122	28.7										lm	1	1.38122	289
GMF	Glia maturation factor	FBgn0028894	ADF-H domain family. Dissambly of actin networks. Disassembly of Arp2/3-nucleated lamellipodial actin networks. Promoting protrusion dynamics during cell migration.				LM2	1.37863	50										lm	1	1.37863	290
bmm	brummer	FBgn0036449	Lipid storage droplet-associated lipase, storage-fat mobilization.				LM2	1.3783	20.2								CC		lm	1	1.3783	291
sqz	squeeze	FBgn0010768	Transcription factor, regulates neuropeptidergic cellular identity.				LM2	1.37738	23.9										lm	1	1.37738	292
Pfdn2	Prefoldin 2	FBgn0010741	Transfers target proteins to cytosolic chaperonin (c-CPN). Protein folding.											LM2	1.37116	84.1			lm	1	1.37116	293
CG5934	CG5934	FBgn0039505					LM2	1.36983	43								X		lm	1	1.36983	294
CG17202	CG17202	FBgn0038043					LM2	1.3674	48.5										lm	1	1.3674	295
TpnC73F	Troponin C at 73F	FBgn0010424	Calcium-binding, muscle control.				LM2	1.36728	9.9										lm	1	1.36728	296
CycY	Cyclin Y	FBgn0032378					LM2	1.36529	51.1								X		lm	1	1.36529	297
Shc	SHC-adaptor protein	FBgn0015296	Receptor tyrosine kinase signalling. Regulates anti-parasitoid immune response (Howell 2012) and tracheal development.				LM2	1.36287	34.2										lm	1	1.36287	298
CG12012	CG12012	FBgn0035444	Orthologous to human BRI3 (brain protein I3).				LM2	1.36105	38.2										lm	1	1.36105	299
ago	archipelago	FBgn0041171	SCF-ubiquitin ligase subunit. Negatively regulates Myc, Cyclin E and Notch. Regulates cell proliferation, survival, and hypoxia-induced gene expression				LM2	1.36067	28.7										lm	1	1.36067	300
CG12991	CG12991	FBgn0030847	Uncharacterized transmembrane protein, unique to Drosophila.				LM2	1.35985	17.3										lm	1	1.35985	301
CG9391	CG9391	FBgn0037063	PtdInsP and InsP phosphatase.				LM2	1.35727	34.6								X		lm	1	1.35727	302
klar	klarsicht	FBgn0001316	Nesprin family. Links microtubule motors and various cellular structures. Migration and positioning of nuclei in photoreceptors and muscles. Motion of RNP granules in oocytes and lipid droplets in embryos.				LM1	1.35482	50.7										lm	1	1.35482	303
Syx7	Syntaxin 7	FBgn0267849	SNARE protein, part of the core machinery for fusion of endocytic cargo vesicles with early endosome.											LM2	1.35021	52.4			lm	1	1.35021	304

## Sheet: Crystal cells
Crystal cells				scRNAseq: fold enrichment ("FC") and % representation
Characteristic genes				Cattenoz			Tattikota			Fu	Leitão			Cho			Girard		Summary	Mean
Symbol	Name	FlyBase ID	Description	Clust	FC	%	Clust	FC	%	Clust	Clust	FC	%	Clust	FC	%	Clust	Fold	Class	n	FC
PPO2	Prophenoloxidase 2	FBgn0033367	Crystal cell phenoloxidase. Melanization of wounds and capsules.	CC	291.427	100	CC2	113.913	76.2	CC	CC	58.9133	87.6	CC2	44.6057	100	CC	398.244	CC	6	128.283	305
PPO1	Prophenoloxidase 1	FBgn0283437	Crystal cell phenoloxidase. Melanization of wounds.	CC	185.414	100	CC2	92.4908	75	CC	CC	46.926	78.4	CC2	41.8915	100	CC	836.396	CC	6	123.038	306
fok	fledgling of Klp38B	FBgn0263773	Embryonic crystal cell formation. Foxo target. Low expression in animals adapted to poor diet or Acinetobacter microbiota (Erkosar-2017).	CC	27.3161	97.8	CC2	54.2156	57.4		CC	10.8156	29.8	CC2	22.8484	100	CC	927.551	CC	5	50.8344	307
CG10467	CG10467	FBgn0035679	Aldose 1-epimerase. Inverts chiral centers in carbohydrates.	CC	22.5375	100	CC2	35.1166	53		CC	11.6475	63.9	CC2	26.4283	100	CC	261.313	CC	5	36.3727	308
CG9119	CG9119	FBgn0035189	Zinc-containing hydrolase.	CC	56.214	97.8	CC2	12.9225	44.3	CC	CC	5.89697	61.4	CC2	15.6547	80.5	CC	560.958	CC	6	32.74	309
MtnA	Metallothionein A	FBgn0002868	Copper detoxification.	CC	115.637	95.6	CC2	41.8363	65.2		CC	1.80764	99.2	CC2	12.3948	66.4	CC	253.931	CC	5	30.757	310
CG15343	CG15343	FBgn0030029	Pyridoxamine 5'-phosphate oxidase. Pyridoxine biosynthesis.	CC	9.22087	75.6	CC2	11.8783	36.9		CC	2.30711	31.6	CC2	22.0096	91.2	CC	329.068	CC	5	17.8854	311
Men	Malic enzyme	FBgn0002719	Oxidation of malate to pyruvate.	CC	31.946	93.3	CC2	13.0158	86.8		CC	6.68808	91.8	CC2	11.5077	100	CC	30.4262	CC	5	15.7647	312
aay	astray	FBgn0023129	Target of Foxo (Harvey 2008). Catalyzes the last step in the biosynthesis of serine from carbohydrates. HAD-like hydrolase superfamily. Haloacid dehalogenase non-protein phosphatases.	CC	18.006	97.8	CC2	5.20814	42.5		CC	3.54196	51.9	CC2	13.2296	98.2	CC	177.823	CC	5	15.086	313
Pde1c	Phosphodiesterase 1c	FBgn0264815	3',5'-cyclic-GMP phosphodiesterase. Dual specificity for cAMP and cGMP.	CC	2.74834	13.3	CC2	11.5817	45.9		CC	12.2715	74.5	CC2	5.25673	84.1	CC	162.823	CC	5	12.7302	314
CG17109	CG17109	FBgn0039051	N-acyl-aliphatic-L-amino acid amidohydrolase. Amino acid metabolism.	CC	1.75165	20	CC2	6.83818	27.1		CC	6.53381	70.4	CC2	13.9497	81.4	CC	195.201	CC	5	11.6338	315
CG5828	CG5828	FBgn0031682	Pantothenate kinase. Coenzyme A biosynthesis.	CC	7.17829	88.9	CC2	5.43072	46.3		CC	3.78869	65.3	CC2	6.82788	95.6	CC	125.2	CC	5	10.4773	316
CG7860	CG7860	FBgn0030653	In crystal cells (Tomancak 2002, FlyBase), down-regulated in mlf mutant, intercting with lz (Miller 2017). Asparaginase and beta-aspartyl peptidase. Asparagine catabolism, protein maturation.	CC	6.98984	84.4	CC2	9.66827	33.3		CC	6.93652	33.6	CC2	7.16352	73.5	CC	34.6482	CC	5	10.3075	317
peb	pebbled	FBgn0003053	Transcriptional attenuator. Negative regulation of JAK-STAT cascade.	CC	3.12201	42.2	CC1	5.67825	58.4	CC	CC	7.52105	73.3	CC2	4.40169	91.2	CC	188.464	CC	6	10.2036	318
CG10469	CG10469	FBgn0035678	Serine protease, digestive type (related to midgut proteases).	CC	10.0816	86.7	CC2	7.36657	58.8		CC	3.90395	53	CC2	4.94455	94.7	CC	76.3991	CC	5	10.1836	319
Ctr1A	Copper transporter 1A	FBgn0062413	Main copper transmembrane transporter.	CC	6.80943	100	CC2	5.78705	62.5		CC	3.34406	80	CC2	6.72337	100	CC	117.032	CC	5	10.0727	320
Atox1	Antioxidant 1 copper chaperone	FBgn0052446	Intracellular copper ion transport, response to oxidative stress.	CC	5.42812	91.1	CC2	9.14455	75.1		CC	3.79549	79.3	CC2	8.30606	100	CC	38.2644	CC	5	9.02514	321
Gip	GIP-like	FBgn0011770	Hydroxypyruvate isomerase. Reversible isomerization between hydroxypyruvate and 2-hydroxy-3-oxopropanoate.	CC	3.5865	68.9	CC2	6.98795	57.1		CC	4.96577	68.4	CC2	9.14055	97.3	CC	38.4884	CC	5	8.47739	323
mthl10	methuselah-like 10	FBgn0035132	G protein coupled receptor. Gbp receptor (Sung-17). Response to starvation?	CC	4.15384	93.3	CC2	6.69197	49		CC	3.50164	44.6	CC2	4.01429	91.2	CC	91.905	CC	5	8.14788	324
CG10602	CG10602	FBgn0032721	Epoxide hydrolase, metallopeptidase, translation??? Human leukotriene A-4 hydrolase homolog, shown to degrade proline-glycine-proline (PGP), a neutrophil chemoattractant.				CC2	4.86719	66.1		CC	2.9572	85.3	CC2	7.38001	99.1	CC	26.64	CC	4	7.29353	326
N	Notch	FBgn0004647	Transmembrane receptor, responsible for lateral inhibition and cell fate choices.				CC1	3.81082	76		CC	4.2793	75.3	CC2			CC	17.2308	CC	3	6.54986	327
St3	Sulfotransferase 3	FBgn0265052	Detoxification of substances upon influx from gut to hemolymph? Mutant sensitive to L. monocytogenes (Ayres 2008).	CC	2.41434	51.1	CC2	2.86599	37.2	CC	CC	1.96927	43.2	CC2	5.42229	91.2	CC	137.766	CC	6	6.33199	328
CG5418	CG5418	FBgn0032436	Uridine nucleosidase.				CC2	3.66763	26.4		CC	1.83551	23.5	CC2	3.87951	41.6	CC	52.4129	CC	4	6.0826	330
fbp	fructose-1,6-bisphosphatase	FBgn0032820	Fructose-1,6-bisphosphatase. Fructose metabolism, gluconeogenesis, sucrose biosynthesis.	CC	2.81676	68.9	CC2	2.31445	33		CC	2.35326	70.8	CC2	6.39577	98.2	CC	83.4723	CC	5	6.06263	331
MtnB	Metallothionein B	FBgn0002869	Copper detoxification.	CC	22.4418	31.1	CC2	5.22278	10.4		CC	3.90187	67.2				CC	2.39173	CC	4	5.7509	333
tna	tonalli	FBgn0026160	Associates with the Brahma chromatin remodeling complex, involved in transcriptional activation.	CC	2.11674	97.8	CC2	4.35573	59.9		CC	3.53379	47.5	CC2	4.82228	97.3	CC	38.7432	CC	5	5.71325	334
Fkbp59	FK506-binding protein FKBP59	FBgn0029174	Peptidylprolyl isomerase. Regulation of calcium transport and phototransduction.	CC	3.28373	84.4	CC2	6.82426	52.6		CC	4.64466	92.1	CC2	5.72674	100	CC	9.64205	CC	5	5.64795	335
meep	meep	FBgn0063667	Ester hydrolase, C11orf54 homolog. Supports insulin sensitivity (Pereira 2020).	CC	3.20837	68.9	CC2	2.3748	22.6		CC	3.55856	61.4	CC2	4.15977	71.7	CC	49.4152	CC	5	5.61337	337
path	pathetic	FBgn0036007	Proton-coupled amino acid transporter. Positive regulation of growth by modulating the effects of TOR signaling.				CC2	2.4245	50.2		CC	2.12541	89.1	CC2	4.17558	92.9	CC	44.4969	CC	4	5.5626	338
CAH2	Carbonic anhydrase 2	FBgn0027843	Carbonic anhydrase.	CC	4.86232	46.7	CC2	4.01435	37		CC	3.64419	53.6	CC2	1.70726	45.1	CC	41.3014	CC	5	5.49623	339
Ald1	Aldolase 1	FBgn0000064	Fructose-bisphosphate aldolase. Glycolysis.	CC	7.16702	97.8	CC2	5.28742	69.1		CC	4.2571	83.8	CC2	5.81646	100	CC	5.17742	CC	5	5.46127	340
CG42369	CG42369	FBgn0259715	Uncharacterized Drosophila-specific protein.	CC	3.05896	55.6	PM12				CC	2.00614	58.3	CC2	2.911	75.2	CC	45.3701	CC	4	5.33564	341
CG17065	CG17065	FBgn0031099	N-acetylglucosamine-6-phosphate deacetylase. N-acetylglucosamine catabolism.	CC	12.331	95.6	CC2	2.81103	32.7		CC	1.52373	55.2	CC2	5.7483	83.2	CC	13.901	CC	5	5.30971	342
klu	klumpfuss	FBgn0013469	C2H2 Zn finger transcription factor. Required for food intake in larvae. Affects neuropeptide gene hugin (hug) expression.	CC	1.38315	17.8	CC1	2.73001	36.4		CC	3.05291	72.7	CC2	2.43357	74.3	CC	104.611	CC	5	4.93758	346
Naxd	NAD(P)HX dehydratase	FBgn0036848	Repair of NAD(P)HX, a damaged form of NAD(P)H resulting from enzymatic or heat-dependent hydration.	Pcd			CC2	4.7704	57.5		CC	3.48505	65.6				CC	6.45604	CC	3	4.75237	347
CG13077	CG13077	FBgn0032810	Cytochrome b561/ferric reductase. Secretory vesicle-specific electron transport protein.	ImpL2			CC1				CC	1.84274	80.4	CC1	1.80394	45.2	CC	28.7949	CC	3	4.5744	348
lz	lozenge	FBgn0002576	Hemopoiesis. Crystal cell-specific. Runt (runx) family transcription factor. Alpha subunit of the transcription factor complex Core Binding Factor.				CC1	2.96884	46.8		CC	1.41614	65	CC2	1.94154	61.1	CC	53.2473	CC	4	4.56599	349
CG10621	CG10621	FBgn0032726	Homocysteine methyltransferase. Human methionine synthase-like.	CC	2.73094	37.8	CC2	1.77744	19.1		MET			CC2	4.17966	69.9	CC	13.7026	CC	4	4.08331	354
Fatp3	Fatty acid transport protein 3	FBgn0034999	2-pass transmembrane protein. Fatty acid transport protein (FATP), transports long-chain or very-long-chain fatty acids across the plasma membrane.	CC	6.77715	75.6								CC2	1.79887	52.2	CC	5.40751	CC	3	4.03969	355
IP3K2	Inositol 1,4,5-triphosphate kinase 2	FBgn0283680	Inositol-trisphosphate 3-kinase. Regulates calcium levels by influencing IP3 signaling.	CC	2.31209	64.4	CC2							CC2	2.5861	71.7	CC	10.0155	CC	3	3.91238	357
CG34136	CG34136	FBgn0083972	Uncharacterized exported (transmembrane?) insect peptide.	CC	2.04147	40	CC2	1.39573	8.6					CC2	2.03819	46	CC	34.7694	CC	4	3.76961	359
Elk	Eag-like K[+] channel	FBgn0011589	Voltage-gated potassium channel α subunit. Genetically linked to P. rettgeri resistance on low-glucose diet (Unckless-2015).	CC	4.61453	60	CC2	2.18946	24.9		CC	1.86206	70.6	CC2	1.83855	45.1	CC	19.1968	CC	5	3.66803	360
fzr	fizzy-related	FBgn0262699	Binds to the Anaphase-Promoting Complex/Cyclosome (APC/C) ubiquitin ligase to stimulate its activity during G1 phase.	CC	2.27476	55.6	CC1				CC	1.44075	78	CC2			CC	14.8926	CC	3	3.65453	361
GstE3	Glutathione S transferase E3	FBgn0063497	Glutathione S transferase. Detoxification.				CC2	2.01183	19.6					CC2	1.69595	32.7	CC	13.7884	CC	3	3.60999	363
E(spl)m3-HLH	Enhancer of split m3, helix-loop-helix	FBgn0002609	E(spl) complex. Transcriptional repressor executing Notch-mediated cellular differentiation.				CC1	3.99309	44.8		CC	1.6685	74.5	PH1			CC	6.331	CC	3	3.48099	364
CG32638	CG32638	FBgn0052638	Type-1 angiotensin II receptor-associated protein. Indirect physical interaction with bbc.				CC1	1.98573	51.3		CC	2.03231	83.7	CC2	2.03722	69	CC	12.7472	CC	4	3.19956	373
Cndp2	Carnosine dipeptidase 2	FBgn0287767	Dipeptidase and metallopeptidase. Proteolysis.				CC2	2.95029	80.7		CC	1.89508	93.3	CC2	3.48273	99.1	CC	5.27565	CC	4	3.18363	374
CG31637	CG31637	FBgn0051637	N-acetylglucosamine 6-O-sulfotransferase. Mutant resistant to Metarhizium (Lu-2015).	PL0			CC2	1.62238	58.2		CC	1.6457	70.7	CC2			CC	11.6904	CC	3	3.14855	375
CG18747	CG18747	FBgn0042104	Arrestin-like. Down(?)-regulation of signal transduction at G protein-coupled receptors.	ImpL2			CC2	2.18182	46.5		CC	2.34131	55.8	CC2	3.44313	93.8	CC	5.09655	CC	4	3.07699	377
Lpin	Lipin	FBgn0263593	Energy metabolism. Insulin pathway signaling.	CC	2.13886	55.6	CC2							CC2	1.4789	45.1	CC	7.78087	CC	3	2.90881	379
CG9005	CG9005	FBgn0033638	Uncharacterized Drosophila-specific protein. Response to endoplasmic reticulum stress.	CC	1.68666	62.2	CC2	1.91902	34.5		CC	1.50907	55.7	CC2	2.33948	79.6	CC	17.3178	CC	5	2.87929	380
Hsp83	Heat shock protein 83	FBgn0001233	Molecular chaperone, enhancse Insulin-like receptor (InR) activation.				CC2				CC	3.04668	96.5	CC2	2.64441	94.7	CC	2.91054	CC	3	2.86226	382
CG6034	CG6034	FBgn0036750	Flavin-containing amine oxidoreductase.	CC	4.8988	28.9	CC2	4.3777	16.2		CC	1.45713	28.9				CC	2.1083	CC	4	2.84899	383
CG10623	CG10623	FBgn0032727	Betaine--homocysteine S-methyltransferase. Methionine biosynthesis.	CC	1.35841	31.1	CC2	2.59634	30		CC	1.61	68.2	CC2	2.15983	61.1	CC	14.4553	CC	5	2.81665	385
Plc21C	Phospholipase C at 21C	FBgn0004611	Olfaction and flight. Downstream of G-protein-coupled receptors coupled to Gq.	CC							CC	1.67737	45.4	CC2	1.61081	50.4	CC	8.1181	CC	3	2.79925	386
Kaz-m1	Kazal-type protease inhibitor m1	FBgn0002578	Kazal-type serine protease inhibitor. Midgut.								CC	1.39898	51.6	CC2	1.58498	31	CC	9.85224	CC	3	2.79548	387
CG2915	CG2915	FBgn0033241	Zn metallocarboxypeptidase.				CC2	1.61029	48.4					CC2	4.24329	97.3	CC	3.16202	CC	3	2.78521	389
CG31174	CG31174	FBgn0051174	Related to human F-BAR domain only protein 2? Early step of clathrin-mediated endocytosis.	CC	2.56317	40	CC2	2.6535	30.5	CC	CC	1.5021	47.9	CC2	2.63539	63.7	CC	6.21836	CC	6	2.7846	390
CG32369	CG32369	FBgn0052369	ATP-dependent Lon protease homolog. Notch/lz target (Terriente-Felix 2013). Catalyzes rapid turnover of short-lived regulatory proteins and many damaged or denatured proteins.	CC	1.48834	35.6	CC2	2.14919	41.1		CC	1.99548	71.4	CC2	3.02552	92.9	CC	8.46722	CC	5	2.77149	393
sut1	sugar transporter 1	FBgn0028563	Sugar/inositol transporter; Major facilitator superfamily.	robo2			CC2				CC	2.24933	76.1	CC2	1.8209	65.5	CC	5.11827	CC	3	2.75732	394
Glut4EF	Glucose transporter 4 enhancer factor	FBgn0267336	Transcription factor. Affercts developmental patterning and morphogenesis.	CC	3.38762	77.8	CC2	2.53349	53.5		CC			CC2	2.49134	93.8	CC	2.61307	CC	4	2.73401	395
CG11791	CG11791	FBgn0039266	Uncharacterized Drosophila-specific protein.	CC			CC2	2.23437	63		CC	3.13606	63.1	CC2	2.24476	97.3	CC	3.38589	CC	4	2.70144	396
CG31431	CG31431	FBgn0051431	Single-pass transmembrane, FGF receptor-like extracellular immunoglobulin-like domain.	Pcd			CC2	2.36351	48.8		CC	2.94392	74.2	CC2	2.49008	94.7	CC	3.05138	CC	4	2.69648	397
Oatp30B	Organic anion transporting polypeptide 30B	FBgn0032123	Transmembrane transporter.				CC1				CC	1.43149	62.6	CC2	1.96288	57.5	CC	6.25108	CC	3	2.59943	401
lncRNA:CR43650	long non-coding RNA:CR43650	FBgn0263659	Uncharacterized non-coding RNA.				CC1	1.6775	25.3		CC	1.92464	63.2	CC2	1.4781	39.8	CC	9.25935	CC	4	2.57825	402
Jafrac1	thioredoxin peroxidase 1	FBgn0040309	Thiol-specific peroxidase. Reduction of hydrogen peroxide and organic hydroperoxides to water and alcohols.	CC	1.95933	46.7	PM5				CC	1.45964	96.1	CC2	4.0721	100	CC	3.64233	CC	4	2.55204	403
NijB	Ninjurin B	FBgn0036822	Cell adhesion, tissue regeneration. Cell autolysis? (Kayagaki 2021)	CC	2.06301	55.6	CC2	1.6112	24.9	CC	CC	1.78025	38.9	CC2	2.92819	79.6	CC	5.43277	CC	6	2.48171	405
Pgd	Phosphogluconate dehydrogenase	FBgn0004654	Pentose phosphate pathway.	CC	2.1573	60	CC2	2.13041	47.3		CC	1.55209	86.2	CC2	2.1197	77	CC	5.43064	CC	5	2.41481	407
bbc	bb in a boxcar	FBgn0033844	Other substituted phosphate group phosphotransferase. Phospholipid homeostasis. Insulin signaling.	robo2			CC2	1.56317	47.3		CC	1.40175	69.4	CC2	2.36543	87.6	CC	5.55998	CC	4	2.31695	414
Vav	Vav ortholog (H. sapiens)	FBgn0040068	Couples tyrosine kinase signals with the activation of the Rho/Rac GTPases. EGFR and Pvr Signaling Pathway Core Component.	CC	2.07134	66.7				CC							CC	2.51282	CC	3	2.28142	416
laza	lazaro	FBgn0037163	Phosphatidate phosphatase. Response to light intensity, thermotaxis.				CC2	1.71805	22.1		CC	2.05153	30.3	CC2	1.4431	36.3	CC	4.3653	CC	4	2.17073	421
dpr17	defective proboscis extension response 17	FBgn0051361	Paralog of dpr1, a member of the Ig superfamily required for the gustatory response to salt.				PM3				CC	1.35996	77.7	CC1	1.64803	68.7	CC	3.27568	CC	3	1.94356	429
Trx-2	thioredoxin-2	FBgn0040070	Various redox reactions	prolif			CC2				CC	1.67624	99.1	CC2	2.00761	95.6	CC	2.09737	CC	3	1.91821	430
JIL-1	JIL-1 kinase	FBgn0020412	Ser/Thr kinase. Phosphorylates His3. Antagonizes heterochromatization.				CC1	1.55353	29.2					CC2	1.3689	46.9	CC	3.10239	CC	3	1.87556	434
CG33170	CG33170	FBgn0053170	Short transmembrane mitochondrial protein 1.	CC	2.36508	64.4					CC	1.38032	66.9	CC2	1.66122	81.4	CC	2.0022	CC	4	1.81527	436
CG1416	CG1416	FBgn0032961	Activator of Hsp90 ATPase, Aha1. Protein folding.				CC2	1.40621	62.2					CC2	1.49255	78.8	CC	2.29609	CC	3	1.6891	437
firl	firelighter	FBgn0032405	Nociception; mutant is heat sensitive. Oxidoreductase, similar to steroid dehydrogenase and retinol dehydrogenase.	robo2			CC2	1.82656	22.6		CC			PM4			CC	41.1069	CC	2	8.66511	322
E(spl)mβ-HLH	Enhancer of split mβ, helix-loop-helix	FBgn0002733	E(spl) complex. Transcriptional repressor executing Notch-mediated cellular differentiation.	PL3			CC2				CC	3.18398	74.7	CC2			CC	20.0919	CC	2	7.99827	325
numb	numb	FBgn0002973	Membrane-associated inhibitor of Notch signaling.	ImpL2										CC2	1.64365	49.6	CC	23.9277	CC	2	6.27128	329
Eaf	ELL-associated factor	FBgn0033166	Increases Su(Tpl)-enhanced transcription elongation by Pol II.	CC	3.74329	82.2								CC2			CC	9.53825	CC	2	5.97532	332
lectin-28C	lectin-28C	FBgn0040099	C-type lectin, galactose binding.				PM12				PLASM1			CC2	4.47607	98.2	CC	7.10608	CC	2	5.6398	336
Ance-4	Ance-4	FBgn0033366	Dipeptidyl-peptidase. Angiotensin converting enzyme-like.				CC2	1.3896	16.2					CC2			CC	19.063	CC	2	5.14683	343
CG6805	CG6805	FBgn0034179	Inositol trisphosphate phosphatase.											CC2	2.12219	76.1	CC	11.7406	CC	2	4.99157	344
CG13868	CG13868	FBgn0034501	Uncharacterized.	CC	2.62888	68.9	PM11							PSC			CC	9.27869	CC	2	4.93888	345
Hsp26	Heat shock protein 26	FBgn0001225	Chaperone, protein folding. Alpha crystallin/Small heat shock protein.	robo2			PM12				CC	3.8076	67	Adi			CC	5.23331	CC	2	4.4639	350
CG12177	CG12177	FBgn0030510	Nucleoside hydrolase.											CC2	1.48901	32.7	CC	12.8702	CC	2	4.37765	351
Oscillin	Oscillin	FBgn0031717	Amino sugar catabolism, generation of precursor metabolites and energy.	CC	7.23416	71.1					MET			CC2	2.60532	51.3	PP		CC	2	4.34135	352
CG1847	CG1847	FBgn0030345	FK506-binding protein. Peptidyl prolyl cis/trans isomerase. Protein folding.											CC2	1.59464	50.4	CC	11.5113	CC	2	4.28443	353
Hsp68	Heat shock protein 68	FBgn0001230	Chaperone. Lifespan determination, response to heat shock and starvation.				PM12				CC	1.91773	55.4	Adi			CC	8.13894	CC	2	3.95073	356
CG42238	CG42238	FBgn0250867	Uncharacterized Drosophila-specific protein.											CC2	1.44267	32.7	CC	10.0302	CC	2	3.80397	358
Lsm12a	LSM12 homolog a	FBgn0030364	RNA metabolism. Circadian pacemaker. Activates TYF-dependent translation of per.											CC2	2.39529	92	CC	5.55608	CC	2	3.64807	362
Hsp23	Heat shock protein 23	FBgn0001224	Chaperone, protein folding. Alpha crystallin/Small heat shock protein.	robo2			CC2				CC	2.4614	66	PM4			CC	4.65342	CC	2	3.38437	365
fry	furry	FBgn0016081	Required for Tricornered activity in control of wing hairs and bristles. Mutant sensitive to Metarhizium (Lu-2015). Integrity of polarized cell extensions during morphogenesis, regulates the actin cytoskeleton.				CC2							CC2	1.59563	60.2	CC	7.16032	CC	2	3.38012	366
CG43064	CG43064	FBgn0262366	Uncharacterized Drosophila-specific protein. Leucine-rich repeat domain. Several paralogs.											CC2	1.63884	47.8	CC	6.96316	CC	2	3.37809	367
lncRNA:CR45018	long non-coding RNA:CR45018	FBgn0266376	Long non-coding RNA. Overlaps IP3K2 (Inositol 1,4,5-triphosphate kinase 2), which regulates calcium levels by influencing IP3 signaling.				CC2				CC	1.47453	48.3	LM1			CC	7.73898	CC	2	3.37807	368
how	held out wings	FBgn0264491	RNA-binding protein, highly expressed in mesoderm and tendon cells. Isoform how(L) induces RNA destabilization, how(S) stabilizes RNA targets.								CC	1.63769	78.8				CC	6.84083	CC	2	3.34711	369
tyf	twenty-four	FBgn0026083	Activates per translation to sustain circadian rhythms. Immune defense against Listeria infection (Stofanko-2008).				CC1	1.85455	39								CC	5.83088	CC	2	3.28841	370
Pex13	Peroxin 13	FBgn0033812	Peroxisomal biogenesis. Required for very-long-chain fatty acid metabolism.											CC2	1.35405	38.9	CC	7.81014	CC	2	3.25197	371
S	Star	FBgn0003310	Egfr ligand transport from ER to the late secretory compartment. Growth, survival and patterning.											CC2	1.52927	45.1	CC	6.84091	CC	2	3.23444	372
Dmtn	Dementin	FBgn0037443	Brain development. Interacts with Appl (β amyloid protein precursor-like).								CC	1.41896	65.8	CC2			CC	6.86341	CC	2	3.12072	376
ApepP	Aminopeptidase P	FBgn0026150	Metalloaminopeptidase. Regulator of β-catenin abundance. Removal of a penultimate prolyl residue from the N-termini of peptides, such as Arg-Pro-Pro.											CC2	1.58142	69	CC	5.61484	CC	2	2.97983	378
Pfrx	6-phosphofructo-2-kinase	FBgn0027621	Fructose metabolism, glycolysis.	CC	1.55487	37.8											CC	5.315	CC	2	2.87474	381
CG13743	CG13743	FBgn0033368	Amino acid transmembrane transporter	CC	5.37731	57.8	CC2	1.50495	18.2										CC	2	2.84475	384
aop	anterior open	FBgn0000097	ETS family transcription repressor. Acts downstream of receptor tyrosine kinase signaling (EGFR, Pvr).	PL2							CC	1.45726	70.9				CC	5.33713	CC	2	2.78883	388
CG31832	CG31832	FBgn0051832	Receptor tyrosine kinase activator.				CC2	1.69454	12.4								CC	4.55788	CC	2	2.77912	391
MtnD	Metallothionein D	FBgn0053192	Metallothionein, strongly inducible by copper and cadmium ions.				CC2	3.03059	14.2		CC	2.53775	85						CC	2	2.77324	392
DnaJ-1	DnaJ-like-1	FBgn0263106	Heat-shock protein co-factor. Regulates larger heat shock proteins providing client specificity.				PM12				CC	1.37764	69.4	Adi			CC	5.22395	CC	2	2.68267	398
MtnE	Metallothionein E	FBgn0262146	Metal-binding peptide; detoxification. Broad spectrum of metal coordination.				CC2	2.3748	9.3		CC	2.91637	81.7						CC	2	2.63169	399
RhoGAP15B	Rho GTPase activating protein at 15B	FBgn0030808	Rho GTPase activating protein. Signal transduction. ADP-ribosylation factor GTPase activating.				CC1				CC	1.44538	63.6				CC	4.74793	CC	2	2.61965	400
CG6733	CG6733	FBgn0039052	Hydrolysis of acylated L-amino acids. Induced by Octosporea (Roxström-Lindquist 2004). Expressed in crystal cells (Ferjoux 2007). Cold acclimation.				CC2	1.6413	6.5								CC	3.91677	CC	2	2.53547	404
CG32284	CG32284	FBgn0052284	Chitin binding domain superfamily.	CC	1.95291	40	CC2	3.08021	19.8										CC	2	2.45263	406
Adk3	Adenylate kinase 3	FBgn0042094	ADP biosynthesis.				CC2	1.41138	33.7					CC2			CC	4.02536	CC	2	2.38355	408
CG2065	CG2065	FBgn0033204	Retinol dehydrogenase, involved in the visual cycle.	CC	1.58305	13.3	PM3										CC	3.57354	CC	2	2.37847	409
Cpr66Cb	Cuticular protein 66Cb	FBgn0035875	Chitin-binding type R&R consensus. Insect cuticle protein, but expressed in several tissues.	CC	2.78144	40	CC2	1.99114	6.8										CC	2	2.35334	410
Ncc69	sodium chloride cotransporter 69	FBgn0036279	Mutant resistant to Metarhizium (Lu-2015). Nerve function. Solute carrier family 12 (SLC12) sodium and/or potassium-coupled chloride transporter.											CC2	1.41681	46	CC	3.88016	CC	2	2.34466	411
Tat	α-tubulin acetylase	FBgn0035989	Alpha-tubulin acetylation and behavioral response to ethanol. Required for mechanosensation.	CC	1.46988	15.6											CC	3.67427	CC	2	2.32395	412
TwdlG	TweedleG	FBgn0037225	Cuticle protein	CC	2.6592	15.6											CC	2.02183	CC	2	2.31871	413
nst	nesthocker	FBgn0036298	Phospho-acetylglucosamine mutase. N-Acetylglucosamine (GlcNAc) biosynthesis. Affects Fibroblast-Growth-Factor signaling.				LM2				CC	1.39472	69.9	CC2			CC	3.7713	CC	2	2.29345	415
Droj2	DnaJ-like-2	FBgn0038145	Hsp40-like. DnaJ domain chaperone.				CC1	1.48	66.2					CC2			CC	3.48182	CC	2	2.27004	417
CG5830	CG5830	FBgn0036556	Protein-serine/threonine phosphatase. Human C-terminal domain RNA polymerase II polypeptide A small phosphatase 1 homolog.				LM2							CC2	1.36245	64.6	CC	3.71284	CC	2	2.24913	418
Tpr2	Tetratricopeptide repeat protein 2	FBgn0032586	Heat Shock Protein 40 (Hsp40) family co-chaperone. Hsp70 chaperone cycle.											CC2	1.71924	81.4	CC	2.85237	CC	2	2.21448	419
cact	cactus	FBgn0000250	IκB homolog. Dif and Dorsal inhibitor. Negative regulator of Toll signaling.	Rel			CC2				CC	1.44712	83.5	CC2			CC	3.28459	CC	2	2.18019	420
CG8468	CG8468	FBgn0033913	Solute carrier family 16 (SLC16). Transmembrane transport of monocarboxylates.	PL2			CC1	1.94785	48.1		CC	2.41449	84.8						CC	2	2.16866	422
CG7556	CG7556	FBgn0030990	Heat Shock Protein 40 (Hsp40) family co-chaperone. Hsp70 chaperone cycle.				CC1							CC2	1.51026	66.4	CC	3.08417	CC	2	2.15822	423
Pdk	Pyruvate dehydrogenase kinase	FBgn0017558	Inhibits the mitochondrial pyruvate dehydrogenase. Regulation of glucose metabolism.	CC	2.0035	88.9					MET			CC2	2.26929	78.8	PSC		CC	2	2.13226	424
Fdx2	Ferredoxin 2	FBgn0035529	Electron transfer. Positive regulation of ecdysteroid biosynthesis.	CC	1.42518	51.1											CC	3.08203	CC	2	2.09581	425
CG2846	CG2846	FBgn0014930	Riboflavin kinase. Phosphorylation of riboflavin (vitamin B2) to form flavin-mononucleotide (FMN).								CC	1.65539	76				CC	2.6	CC	2	2.07461	426
AsnS	Asparagine synthetase	FBgn0270926	Asparagine biosynthesis (glutamine-hydrolysis).											CC2	1.5757	32.7	CC	2.72757	CC	2	2.07312	427
ct	cut	FBgn0004198	Transcription factor.	PL2			CC1	1.7555	72.7					PSC			CC	2.31783	CC	2	2.01716	428
AdipoR	Adiponectin receptor	FBgn0038984	Regulates insulin secretion In insulin-producing cells. Controls glucose and lipid metabolism.	CC	1.5389	64.4											CC	2.36121	CC	2	1.90622	431
cl	clot	FBgn0000318	Protein-disulfide reductase, with thioredoxin reductase and glutathione peroxidase activity. Oxidative stress.				LM2				CC	1.59656	94.2	CC1			CC	2.25037	CC	2	1.89548	432
CG1764	CG1764	FBgn0030467	Dimethylargininase. Arginine metabolism.	CC	2.17766	57.8								CC2	1.64302	39.8	X		CC	2	1.89154	433
ZnT63C	Zinc transporter 63C	FBgn0035432	Zinc export from the cell or into organelles. Mutant resistant to Metarhizium (Lu-2015).	Rel			LM2				CC	1.55167	87.2	PM4			CC	2.22684	CC	2	1.85885	435
Fib	Fibrillarin	FBgn0003062	rRNA 2'-O-methyltransferase required for pre-rRNA processing.	Inos			CC1	1.71531	57.1		CC	1.48271	92.1	PH2			PP		CC	2	1.59477	438
Pect	Phosphoethanolamine cytidylyltransferase	FBgn0032482	Transfer of a cytidylyl group.				CC1	1.38538	54.5					CC1	1.64769	77.7			CC	2	1.51085	439
Cyp6w1	Cyp6w1	FBgn0033065	Cytochrome P450.								CC	1.48798	70.6	CC1	1.42062	33.1			CC	2	1.45391	440
Atg4a	Autophagy-specific gene 4a	FBgn0031298	Autophagy.	CC	1.36604	62.2								CC2	1.36324	48.7	PSC		CC	2	1.36464	441
Hsp70Ba	Heat-shock-protein-70Ba	FBgn0013277	Hsp70 chaperone.				PM11										CC	23.4282	cc	1	23.4282	442
CG16886	CG16886	FBgn0028938	Exported low-complexity repetitive protein.	CC	20.1475	42.2													cc	1	20.1475	443
BORCS5	BLOC-1 related complex subunit 5	FBgn0030346	Lysosome localization, organelle transport, positive regulation of anterograde synaptic vesicle transport.														CC	9.97486	cc	1	9.97486	444
REPTOR	Repressed by TOR	FBgn0039209	Transcription factor, regulated by Tor.	CC										CC2			CC	9.71359	cc	1	9.71359	445
Hsp70Bbb	Hsp70Bbb	FBgn0051354	Hsp70 chaperone.				PM11										CC	7.65389	cc	1	7.65389	446
tinc	tincar	FBgn0261649	Transmembrane protein, expressed in Tinman-expressing cardioblasts. Mutant sensitive to Metarhizium (Lu-2015).														CC	7.61858	cc	1	7.61858	447
Hsp70Aa	Heat-shock-protein-70Aa	FBgn0013275	Hsp70 chaperone.				PM9										CC	7.32078	cc	1	7.32078	448
CG15739	CG15739	FBgn0030347	Haloacid Dehalogenase (HAD) family phosphatase.														CC	7.086	cc	1	7.086	449
Hsp67Bc	Heat shock gene 67Bc	FBgn0001229	Small heat shock protein. Clearance of misfolded proteins.														CC	5.66921	cc	1	5.66921	450
CG30389	CG30389	FBgn0050389	MACO1 homolog. Regulation of neuronal activity.	CC			LM2										CC	5.52392	cc	1	5.52392	451
CG2818	CG2818	FBgn0031566	Glycerophosphocholine phosphodiesterase.	robo2										CC2			CC	5.41026	cc	1	5.41026	452
EDTP	Egg-derived tyrosine phosphatase	FBgn0027506	Phosphatidylinositol-3-phosphatase.														CC	5.4011	cc	1	5.4011	453
Pli	Pellino	FBgn0025574	RING-domain-containing ubiquitin E3 ligase. Negative regulator of Toll signaling.														CC	5.30829	cc	1	5.30829	454
mRpL13	mitochondrial ribosomal protein L13	FBgn0032720	Negative regulation of mitochondrial translation	CC	4.94292	93.3													cc	1	4.94292	455
CG10737	CG10737	FBgn0034420	C2 domain-containing protein 2-like. Transports phosphatidylinositol between bilayers.											CC2			CC	4.83721	cc	1	4.83721	456
Cyp12d1-p	Cyp12d1-p	FBgn0050489	Cytochrome P450. Breakdown of synthetic insecticides.														CC	4.75947	cc	1	4.75947	457
ken	ken and barbie	FBgn0011236	Transcription factor. Negative regulator of JAK-STAT signaling. Genital formation.														CC	4.70993	cc	1	4.70993	458
Ziz	Zizimin	FBgn0260486	Rho guanyl-nucleotide exchange factor (Rho-GEF). Activates Rac2 and Cdc42 in activated hemocytes (Sampson-2012).														CC	4.69044	cc	1	4.69044	459
Mtap	Methylthioadenosine phosphorylase ortholog	FBgn0034215	Methionine salvage pathway. Production of adenine.														CC	4.55405	cc	1	4.55405	460
CG34183	CG34183	FBgn0085212	RNA Pol II subunit B1 C-terminal domain (CTD) phosphatase homolog.														CC	4.46895	cc	1	4.46895	461
CG10383	CG10383	FBgn0032699	Hydrolase, regulation of glycosylphosphatidylinositol metabolism.				LM2										CC	4.43831	cc	1	4.43831	462
pinta	prolonged depolarization afterpotential (PDA) is not apparent	FBgn0038966	Retinoid-binding protein. Rhodopsin biosynthesis.											Adi			CC	4.39912	cc	1	4.39912	463
Rift	Riboflavin transporter	FBgn0039882	Riboflavin transmembrane transporter. Riboflavin transport.														CC	4.33362	cc	1	4.33362	464
Herc4	HECT and RLD domain containing E3 ubiquitin ligase 4	FBgn0035207	E3 ubiquitin ligase. Positive regulation of Toll signaling (Kanoh 2015).														CC	4.26171	cc	1	4.26171	465
Mlf	Myelodysplasia/myeloid leukemia factor	FBgn0034051	Transcriptional regulation, eye morphogenesis, Lozenge activity in hematopoesis, assembly of the COP9 signalosome.				PM10										CC	4.13409	cc	1	4.13409	466
Hsp70Ab	Heat-shock-protein-70Ab	FBgn0013276	Hsp70 chaperone.				PM9										CC	4.04173	cc	1	4.04173	467
CG13116	CG13116	FBgn0032139	Uncharacterized Drosophila-specific protein.											PH6			CC	3.84503	cc	1	3.84503	468
CG17029	CG17029	FBgn0036551	Inositol monophosphate 1-phosphatase.														CC	3.68645	cc	1	3.68645	469
Gbp3	Growth-blocking peptide 3	FBgn0039031	Cytokine? Thr,Pro-rich peptide. 8 Cys.														CC	3.66944	cc	1	3.66944	470
CG12643	CG12643	FBgn0040942	Uncharacterized Drosophila-specific protein.														CC	3.60452	cc	1	3.60452	471
CG8112	CG8112	FBgn0037612	Sterol O-acyltransferase. Cholesterol esterification.	CC	3.4963	80								Adi					cc	1	3.4963	472
CG9663	CG9663	FBgn0031516	ATP-binding cassette (ABC) transporter. Cholesterol transmembrane transport.	CC													CC	3.37526	cc	1	3.37526	473
Rh4	Rhodopsin 4	FBgn0003250	Light receptor	CC	3.30411	31.1													cc	1	3.30411	474
Diap1	Death-associated inhibitor of apoptosis 1	FBgn0260635	E3 ubiquitin ligase with caspase-inhibitory activity. Control of apoptosis.				LM2							PH1			CC	3.30018	cc	1	3.30018	475
CG15771	CG15771	FBgn0029801	Haloacid Dehalogenase (HAD) family. N-acylneuraminate-9-phosphatase-like. Sessile hemocytes disrupted in mutant (Stofanko 2008).														CC	3.17666	cc	1	3.17666	476
Cyp6a13	Cytochrome P450 6a13	FBgn0033304	Metabolism of insect hormones, breakdown of synthetic insecticides.														CC	3.17221	cc	1	3.17221	477
Mkp3	Mitogen-activated protein kinase phosphatase 3	FBgn0036844	Mitogen-activated protein kinase phosphatase. Dephosphorylates the MAPKs p38a and rl.											PH2			CC	3.04426	cc	1	3.04426	478
kat80	katanin 80	FBgn0040207	Microtubule binding. Mutant sensitive to Metarhizium (Lu-2015).														CC	3.03169	cc	1	3.03169	479
cv-c	crossveinless c	FBgn0285955	RhoGTPase activating protein. Mutant resistant to Metarhizium (Lu-2015).				PM6										CC	3.02566	cc	1	3.02566	480
CG10973	CG10973	FBgn0036306	Adenyl-nucleotide exchange factor. HSPA (Hsp70) binding protein 1 homolog.														CC	2.92671	cc	1	2.92671	481
Unc-76	Unc-76	FBgn0040395	Axonal transport. Orthologous to several human FEZ2 (fasciculation and elongation protein zeta 2).											CC2			CC	2.91672	cc	1	2.91672	482
shep	alan shepard	FBgn0052423	RNA/DNA binding protein. Regulates alternative splicing and gypsy insulator.				CC1							CC2			CC	2.869	cc	1	2.869	483
sba	six-banded	FBgn0016754	PWWP domain, Methyl-CpG binding domain. DNA methylation?														CC	2.8537	cc	1	2.8537	484
lncRNA:CR43314	long non-coding RNA::CR43314	FBgn0263019	Long non-coding RNA.														CC	2.84621	cc	1	2.84621	485
CG9674	CG9674	FBgn0036663	Glutamate synthetase. Glutamate biosynthesis.	CC	2.81878	51.1	LM2												cc	1	2.81878	486
nonA	no on or off transient A	FBgn0004227	mRNA binding, regulatory region DNA binding. Vision and courtship behavior.														CC	2.81039	cc	1	2.81039	487
CG31705	CG31705	FBgn0028490	Uncharacterized mucin-like membrane protein	robo2										LM2			CC	2.80857	cc	1	2.80857	488
Pgant5	polypeptide GalNAc transferase 5	FBgn0031681	polypeptide GalNAc transferase 5 (CG31651 gene symbol:CG31651 FBgn0051651 )														CC	2.80085	cc	1	2.80085	489
ZnT77C	Zinc transporter 77C	FBgn0037000	Transport of Zn2+ from the cytosol across organelle or plasma membranes.														CC	2.76182	cc	1	2.76182	490
CG7945	CG7945	FBgn0036505															CC	2.7526	cc	1	2.7526	491
α-Est9	α-Esterase-9	FBgn0015577	Cholinesterase.	CC	2.65551	62.2													cc	1	2.65551	492
Gk2	Glycerol kinase 2	FBgn0035266	Formation of glycerol 3-phosphate. Triglyceride metabolism.														CC	2.63702	cc	1	2.63702	493
Hsf	Heat shock factor	FBgn0001222	Heat-shock transcription factor.														CC	2.59123	cc	1	2.59123	494
Ctr9	CG2469	FBgn0035205															CC	2.54056	cc	1	2.54056	495
Stip1	Stress induced phosphoprotein 1	FBgn0024352	Co-chaperone Hsp70/Hsp90-organizing protein.				CC1										CC	2.52697	cc	1	2.52697	496
Sgt1	suppressor-of-G2-allele-of-skp1	FBgn0265101															CC	2.49128	cc	1	2.49128	497
αγ-element	αγ element	FBgn0004084	Non-coding repeat. Transcribed in response to heat shock.														CC	2.48589	cc	1	2.48589	498
ctrip	circadian trip	FBgn0260794															CC	2.47429	cc	1	2.47429	499
Gαq	G protein α q subunit	FBgn0004435												CC2			CC	2.46056	cc	1	2.46056	500
CG9003	CG9003	FBgn0033639												Adi			CC	2.45766	cc	1	2.45766	501
lncRNA:CR32218	ncRNA	FBgn0052218															CC	2.45253	cc	1	2.45253	502
Su(fu)	Suppressor of fused	FBgn0005355															CC	2.42693	cc	1	2.42693	503
CG34250	CG34250	FBgn0085279					PM12										CC	2.4172	cc	1	2.4172	504
Qsox1	CG4670	FBgn0033814	Sulfhydryl oxidase/thioredoxin-like (CG4670 gene symbol:CG4670 FBgn0033814 (GO:0016971 flavin-linked sulfhydryl oxidase))														CC	2.41081	cc	1	2.41081	505
CG9425	CG9425	FBgn0036451															CC	2.37439	cc	1	2.37439	506
Sclp	CG2471	FBgn0030357															CC	2.36613	cc	1	2.36613	507
CG16721	CG16721	FBgn0029820												CC2			CC	2.35631	cc	1	2.35631	508
Cdc37	Cdc37	FBgn0011573	Co-chaperone that inhibits Wnt and Hh signaling. Binds to numerous kinases and promotes their interaction with the Hsp90 complex.														CC	2.35591	cc	1	2.35591	509
Hsc70Cb	CG6603	FBgn0026418					CC1							CC2			CC	2.35554	cc	1	2.35554	510
Ehbp1	Eps15 homology domain containing protein-binding protein 1	FBgn0034180	Calponin homology domain. Actin binding. Basement membrane constituent secretion. Positive regulation of Notch signaling.											PM4			CC	2.35005	cc	1	2.35005	511
rols	rolling pebbles	FBgn0041096	Required for myoblast fusion in muscle founder cells.														CC	2.34114	cc	1	2.34114	512
Tsp42Er	Tetraspanin 42Er	FBgn0033139	Cell surface receptor signaling pathway.														CC	2.33556	cc	1	2.33556	513
CHORD	CG6198	FBgn0029503															CC	2.31334	cc	1	2.31334	514
ninaD	neither inactivation nor afterpotential D	FBgn0002939	Orthologous to human SCARB1 (scavenger receptor class B member 1). Carotenoid transport, phototransduction and rhodopsin biosynthesis.														CC	2.30754	cc	1	2.30754	515
D2hgdh	D-2-hydroxyglutaric acid dehydrogenase	FBgn0023507	Metabolizes D-2-hydroxyglutarate, produced by NADP-dependent isocitrate dehydrogenase in hemocyte mitochondria.														CC	2.29896	cc	1	2.29896	516
mrj	mrj	FBgn0034091	Hsp40 family co-chaperone.				LM2										CC	2.26052	cc	1	2.26052	517
Sox14	Sox box protein 14	FBgn0005612															CC	2.25999	cc	1	2.25999	518
ND-B16.6	CG3446	FBgn0029868												CC2			CC	2.25836	cc	1	2.25836	519
CG4797	CG4797	FBgn0034909	SLC2 transmembrane transporter of hexose sugars (trehalose, glucose and fructose).	CC	2.24954	44.4													cc	1	2.24954	520
chb	chromosome bows	FBgn0021760					LM2										CC	2.23639	cc	1	2.23639	521
CG34288	CG34288	FBgn0085317												CC2			CC	2.23579	cc	1	2.23579	522
sws	swiss cheese	FBgn0003656															CC	2.22868	cc	1	2.22868	523
Sod1	Superoxide dismutase	FBgn0003462	Removal of superoxide radicals.				CC2							CC2			CC	2.21675	cc	1	2.21675	524
Sdc	Syndecan	FBgn0010415	Transmembrane heparan sulfate proteoglycan.	PL0			PM10										CC	2.2112	cc	1	2.2112	525
CG33465	CG33465	FBgn0053465	Serine protease and pseudoprotease domains. Exported.											CC2			CC	2.16699	cc	1	2.16699	526
MESR6	Misexpression suppressor of ras 6	FBgn0036846															CC	2.14954	cc	1	2.14954	527
GstE11	Glutathione S transferase E11	FBgn0034354	Glutathione S transferase. Detoxification.											PH1			CC	2.13887	cc	1	2.13887	528
CG1316	CG1316	FBgn0035526															CC	2.12947	cc	1	2.12947	529
lncRNA:CR43051	long non-coding RNA:CR43051	FBgn0262353	Long non-coding RNA.											CC2			CC	2.12858	cc	1	2.12858	530
swm	second mitotic wave missing	FBgn0002044															CC	2.12758	cc	1	2.12758	531
pall	pallbearer	FBgn0036005															CC	2.125	cc	1	2.125	532
Sema5c	Semaphorin-5c	FBgn0284221	Semaphorin, axonal growth cone guidance molecule. Contributes to olfactory behavior in adult Drosophila.														CC	2.1159	cc	1	2.1159	533
Hsp60A	Heat shock protein 60	FBgn0015245	Chaperonin, mitochondria.				CC1	2.10934	63					PH2					cc	1	2.10934	534
NUCB1	NUCB1	FBgn0052190	Nucleobindin. Glycoside hydrolase/deacetylase in Golgi. Mutant sensitive to Vibrio infection.											CC2			CC	2.09405	cc	1	2.09405	535
nclb	no child left behind	FBgn0263510					CC1										CC	2.09098	cc	1	2.09098	536
Tsp42Eq	Tetraspanin 42Eq	FBgn0033138	Tetraspanin. Tetraspanin-enriched microdomains. Cell surface receptor signaling.														CC	2.09054	cc	1	2.09054	537
CG31109	CG31109	FBgn0051109															CC	2.09048	cc	1	2.09048	538
nudC	CG9710	FBgn0021768					CC1										CC	2.08189	cc	1	2.08189	539
su(r)	suppressor of rudimentary	FBgn0086450															CC	2.07753	cc	1	2.07753	540
fbl	fumble	FBgn0011205	Coenzyme A de novo biosynthesis pathway.	CC	2.07191	66.7													cc	1	2.07191	541
CG1815	CG1815	FBgn0039863	RING finger domain. Perhaps ubiquitin (E3) ligase. Rregulation of transcription.														CC	2.0463	cc	1	2.0463	542
dpp	decapentaplegic	FBgn0000490															CC	2.03717	cc	1	2.03717	543
CG32512	CG32512	FBgn0052512												PH6			CC	2.0354	cc	1	2.0354	544
Picot	Picot	FBgn0024315	Phosphate ion transmembrane transporter.	CC	2.02946	13.3	LM2												cc	1	2.02946	545
lncRNA:CR46064	long non-coding RNA:CR46064	FBgn0267733															CC	2.0273	cc	1	2.0273	546
Ubr1	CG9086	FBgn0030809															CC	2.0244	cc	1	2.0244	547
m-cup	mann-cup	FBgn0038488															CC	2.02129	cc	1	2.02129	548
Efa6	Exchange factor for Arf 6 ortholog (H. sapiens)	FBgn0051158															CC	2.01526	cc	1	2.01526	549
Ugt37A3	UDP-glycosyltransferase family 37 member A3	FBgn0038083	Detoxification of substrates, cuticle formation, pigmentation and olfaction. Mutant sensitive to Metarhizium (Lu-2015).														CC	2.00777	cc	1	2.00777	550
Cht6	Chitinase 6	FBgn0263132	Extracellular matrix formation	CC	1.99995	28.9													cc	1	1.99995	551
Dyak-FKBP59							CC2	1.95702	25.5										cc	1	1.95702	552
Ugt301D1	UDP-glycosyltransferase family 301 member D1	FBgn0032684	Detoxification of small hydrophobic molecules.	CC	1.92435	31.1													cc	1	1.92435	553
CG32850	CG32850	FBgn0052850									CC	1.91102	72.9						cc	1	1.91102	554
GluRIA	Glutamate receptor IA	FBgn0004619	Receptor for glutamate, an excitatory neurotransmitter in the CNS.	CC	1.82365	20													cc	1	1.82365	555
CG34228	CG34228	FBgn0085257	SMIM12 (small integral membrane protein 12) homology.	CC	1.77718	37.8													cc	1	1.77718	556
CG15309	CG15309	FBgn0030183	Yippee zinc-binding/DNA-binding /Mis18, centromere assembly. Highly conserved small protein.	CC	1.73631	68.9								Adi					cc	1	1.73631	557
Rpn8	Regulatory particle non-ATPase 8	FBgn0002787	Proteasome regulatory particle. Ubiquitin-dependent protein catabolism.											CC2	1.70557	69.9			cc	1	1.70557	558
Tsp29Fa	Tetraspanin 29Fa	FBgn0032074	Cell surface receptor signaling pathway.											CC2	1.6488	27.4			cc	1	1.6488	559
CycG	Cyclin G	FBgn0039858	Contributes to DNA repair, cell cycle regulation, growth and metabolism	CC	1.64818	97.8	PM11							CC2					cc	1	1.64818	560
Lfg	Lifeguard	FBgn0025692	Modulates FasL-mediated apoptosis by interfering with caspase 8 activation.											CC2	1.63659	31.9			cc	1	1.63659	561
RpLP0-like	Ribosomal protein LP0-like	FBgn0033485	Ribosomal protein.	CC	1.54962	51.1													cc	1	1.54962	562
Nopp140	Nopp140	FBgn0037137	Nucleolar and Cajal body protein. Chaperone in the assembly of small nucleolar ribonucleoprotein particles.				CC1	1.54251	40.3										cc	1	1.54251	563
Muc26B	Mucin 26B	FBgn0040950	Chitin binding; extracellular matrix structural constituent. Midgut-specific.	CC	1.53861	22.2													cc	1	1.53861	564
CG11318	CG11318	FBgn0039818	Adenylate cyclase-activating G-protein coupled receptor.	CC	1.48369	22.2													cc	1	1.48369	565
CG12974	CG12974	FBgn0037065	Gut-specific uncharacterized protein.	CC	1.48282	15.6													cc	1	1.48282	566
Sodh-1	Sorbitol dehydrogenase 1	FBgn0024289												CC2	1.48007	27.4			cc	1	1.48007	567
jdp	jdp	FBgn0027654	Hsp40-like. DnaJ domain chaperone.				PM10							CC2	1.47504	55.8			cc	1	1.47504	568
α-Est3	α-Esterase-3	FBgn0015571	Carboxylesterase.											CC2	1.47092	31			cc	1	1.47092	569
28SrRNA-Ψ:CR45862	28S ribosomal RNA pseudogene:CR45862	FBgn0267522					CC1	1.46941	7.8										cc	1	1.46941	570
kst	karst	FBgn0004167	Crosslinks F-actin, acts as molecular scaffold. Endosomal trafficking, cell adhesion, cell signaling and growth control.	CC	1.462	26.7	CC1							PM1			PL2		cc	1	1.462	571
CG34120	CG34120	FBgn0083956					CC1	1.45634	6.5										cc	1	1.45634	572
Dark	Death-associated APAF1-related killer	FBgn0263864	Essential component of the apoptosome. With Dronc required for apoptotic cell death.	CC	1.45477	57.8													cc	1	1.45477	573
Alg1	ALG1, chitobiosyldiphosphodolichol β-mannosyltransferase	FBgn0038552					CC1	1.44887	16.2										cc	1	1.44887	574
Rim	Rab3 interacting molecule	FBgn0053547	Calcium ion-regulated exocytosis.	CC	1.44465	17.8													cc	1	1.44465	575
Prp3	Precursor RNA processing 3	FBgn0036915	Small nuclear ribonucleoprotein. Spliceosome. Regulates chromatin silencing.	CC	1.43846	40													cc	1	1.43846	576
CG12301	CG12301	FBgn0036514					CC1	1.4359	20.8										cc	1	1.4359	577
Jheh2	Juvenile hormone epoxide hydrolase 2	FBgn0034405	Hydrolysis of cis-stilbene oxide. Tolerance to oxidative stress.								CC	1.43366	56.9						cc	1	1.43366	578
nrv1	nervana 1	FBgn0015776	β subunit of the Na[+], K[+] ATPase ion pump, maintaining cellular membrane potential in muscles.								CC	1.42685	74.2						cc	1	1.42685	579
Rbm13	RNA-binding motif protein 13	FBgn0030067									CC	1.42187	70.5						cc	1	1.42187	580
CG1578	CG1578	FBgn0030336	Diphthine-ammonia ligase. Peptidyl-diphthamide biosynthesis?	CC	1.42035	57.8													cc	1	1.42035	581
CG11089	CG11089	FBgn0039241	IMP cyclohydrolase. Nucleotide biosynthesis. Wound repair.				CC1	1.41943	29.9										cc	1	1.41943	582
Nnp-1	Nnp-1	FBgn0022069	Ribosomal RNA processing protein 1 homolog.				CC1	1.41851	35.7										cc	1	1.41851	583
Uhg2	U snoRNA host gene 2	FBgn0063449	U snoRNA host gene				CC1				CC	1.41719	64.3	CC1					cc	1	1.41719	584
CG14567	CG14567	FBgn0037126	Bacterial outer membrane lipoprotein-like.				CC1	1.39599	7.1					PM4					cc	1	1.39599	585
sgl	sugarless	FBgn0261445	UDP-glucose 6-dehydrogenase. Biosynthesis of glycosaminoglycans; hyaluronan, chondroitin sulfate and heparan sulfate. Required for wingless signaling.	CC	1.38543	37.8								CC1			X		cc	1	1.38543	586
CG3847	CG3847	FBgn0029867					CC1	1.37876	24										cc	1	1.37876	587
CG8034	CG8034	FBgn0031011	Monocarboxylic acid transmembrane transporter.											CC2	1.37742	54.9			cc	1	1.37742	588
GNBP3	Gram-negative bacteria binding protein 3	FBgn0040321	Hemolymph protein. Sensing of glucan (a fungal cell wall component) upstream of the Toll pathway.	CC	1.37441	20													cc	1	1.37441	589
lncRNA:CR43264	ncRNA	FBgn0262945					PM5				CC	1.37148	86.6						cc	1	1.37148	590
ttm50	tiny tim 50	FBgn0250874					CC1	1.35743	31.2										cc	1	1.35743	591
Hk	Hyperkinetic	FBgn0263220	Beta-subunit of Sh K+ channels. Modulates channel function. Regulating action potentials and transmitter release.	CC	1.35455	13.3													cc	1	1.35455	592

## Sheet: Primocytes
Primocytes				scRNAseq: fold enrichment ("FC") and % representation
Characteristic genes				Cattenoz			Tattikota			Fu	Leitão			Cho			Girard		Summary	Mean
Symbol	Name	FlyBase ID	Description	Clust	FC	%	Clust	FC	%	Clust	Clust	FC	%	Clust	FC	%	Clust	Fold	Class	n	FC
CG15550	CG15550	FBgn0039811	Uncharacterized single-pass transmembrane protein (TMHMM). Unique for Drosophila (Sophophora).	ImpL2	70.2737	100	PM11	68.0914	25.7	Pri				PSC	37.2153	100	PSC	5005.05	PRI	5	172.784	593
tau	tau	FBgn0266579	Microtubule-associated protein - delivery of synaptic proteins - vesicular axonal transport.	ImpL2	20.9065	95.2	PM11	5.94098	25					PSC	6.73684	91.5	PSC	294.788	PRI	4	22.2857	596
Antp	Antennapedia	FBgn0260642	Homeodomain transcription factor. Specification of segmental identity.	ImpL2	7.74206	61.9	PM11	5.426	23.6	Pri				PSC	6.95681	93.1	PSC	805.881	PRI	5	22.0295	597
mthl12	methuselah-like 12	FBgn0045442	G protein-coupled receptor.	ImpL2	6.97972	57.1				Pri				PSC	2.79248	33.9	PSC	300.019	PRI	4	18.016	600
kn	knot	FBgn0001319	(=collier) Transcription factor, Early B Cell Factor homolog. Lymph gland hematopoiesis: posterior signaling center and prohemocytes.	ImpL2	13.0448	90.5	PM11	3.97001	23	Pri				PSC	4.14294	79.4	PSC	344.203	PRI	5	16.485	601
mthl7	methuselah-like 7	FBgn0035847	G protein-coupled receptor.				PM11	13.6221	16.9					PSC	11.2251	53.4	PSC	24.5729	PRI	3	15.5464	602
CG44325	CG44325	FBgn0265413	Uncharacterized 3-pass transmembrane protein. Septate junction assembly. Unique to Drosophila.	ImpL2	4.40046	52.4	PM11	3.71055	28.4		PLASM1			PSC	5.41064	91	PSC	536.836	PRI	4	14.7573	603
CG6287	CG6287	FBgn0032350	Phosphoglycerate dehydrogenase. Cellular amino acid metabolism.	ImpL2	7.54422	71.4	PM11	3.07846	18.9					PSC	4.89068	84.7	PSC	218.012	PRI	4	12.5444	605
CG30054	CG30054	FBgn0050054	G protein alpha subunit. Adenylate cyclase-modulating G-protein coupled receptor signaling.				PM11	3.98775	18.9					PSC	3.61054	64	PSC	100.458	PRI	3	11.3091	607
ImpL2	Ecdysone-inducible gene L2	FBgn0001257	Secreted protein that binds Ilp2. Inhibits growth non-autonomously.	ImpL2	17.6098	90.5	PM11	5.76188	27	Pri				PSC	7.607	77.2	PSC	11.3946	PRI	5	9.68405	608
CtsF	Cathepsin F	FBgn0260462	Lysosomal cysteine protease. Autophagic cell death?				PM11	2.93501	45.9					PSC	3.93228	94.7	PSC	29.5113	PRI	3	6.98362	613
Fur1	Furin 1	FBgn0004509	Furin, pro-hormone convertase.	ImpL2	3.80609	38.1	PM11	2.77255	29.1					PSC	3.3304	77.2	PSC	63.5654	PRI	4	6.87494	614
CG15549	CG15549	FBgn0039810	Uncharacterized Drosophila-specific protein. Testis.				PM11	2.07054	12.2					PSC	3.8574	73	PSC	37.6437	PRI	3	6.6992	615
elB	elbow B	FBgn0004858	Zinc finger transcription factor, specifies distinct tracheal cell fates.	ImpL2	5.83392	42.9	PM11	2.59005	16.9					PSC	2.46685	58.7	PSC	47.7794	PRI	4	6.49625	616
mspo	M-spondin	FBgn0020269	A component of the ECM, mediates mechanical linkage between the muscles and apodemes.	ImpL2	11.0347	85.7								PSC	1.71486	47.6	PSC	11.2218	PRI	3	5.96601	617
ced-6	ced-6	FBgn0029092	Binds the engulfment receptor drpr. Induction of phagocytosis of apoptotic cells.				PM11	1.9513	48.6		PLASM1			PSC	2.80017	88.9	PSC	23.9671	PRI	3	5.07817	619
5-HT1B	5-hydroxytryptamine (serotonin) receptor 1B	FBgn0263116	Serotonin receptor 1B. Cell membrane.	ImpL2	7.40583	47.6								PSC	1.86367	33.9	PSC	9.05943	PRI	3	5.00051	620
CG17508	CG17508	FBgn0039970	Affects mitochondrial respiratory capacity and glycolysis.	ImpL2	4.16924	61.9								PSC	1.75188	58.2	PSC	9.77621	PRI	3	4.14869	624
AnxB11	Annexin B11	FBgn0030749	Annexin, Ca2+-dependent, phospholipid-binding protein, proposed to have a role in membrane traffic.	ImpL2	6.09706	95.2	PM11							PSC	2.07884	95.8	PSC	5.61718	PRI	3	4.14464	625
ham	hamlet	FBgn0045852	PRDM family transcription factor. Regulates neuron fate. Binary fate decision.	ImpL2	10.1781	81	PM11	1.76439	27	Pri	PLASM2			PSC	3.06615	86.2	PSC	5.185	PRI	5	4.11056	626
rdgA	retinal degeneration A	FBgn0261549	Diacylglycerol kinase. Conversion of diacylglycerol to phosphatidic acid. Phospholipase C signalling reactions, controlling ion channel activity and protein transport.	ImpL2	4.25344	42.9	PM11							PSC	2.34882	47.6	PSC	6.76147	PRI	3	4.07265	627
Gel	Gelsolin	FBgn0010225	Calcium-regulated, actin-modulating protein. Actin filament polymerization.	PL3			PM11	2.85948	70.3		CC			PSC	3.26951	93.7	PSC	7.14316	PRI	3	4.05714	628
CG9451	CG9451	FBgn0036876	Histidine acid phosphatase, Phosphoglycerate mutase-like. Mutant resistant to Metarhizium (Lu-2015).				PM11	3.68942	10.1					PSC	6.91925	39.7	PSC	2.04897	PRI	3	3.73982	630
CrebA	Cyclic-AMP response element binding protein A	FBgn0004396	Leucine-zipper transcription factor. Canonical secretory pathway and tissue-specific genes in the salivary gland and epidermis.	Pcd			PM11	2.52223	41.2					PSC	2.69039	91.5	PSC	5.93788	PRI	3	3.42829	633
CG2865	CG2865	FBgn0023526	Uncharacterized. Similar to human SERTA domain-containing protein 4 (ell cycle progression and chromatin remodelling??).	AMP			PM11	2.53686	41.9					PSC	3.03549	98.4	PSC	4.83095	PRI	3	3.33825	635
Apt1	Acyl-protein thioesterase 1	FBgn0042138	Palmitoyl-protein hydrolase. Protein depalmitoylation.				PM11	1.61477	19.6					PSC	2.0063	64.6	PSC	11.1414	PRI	3	3.30482	636
CG5196	CG5196	FBgn0038039	Palmitoyltransferase. Adds palmitate to cysteine residues through thioester bonds.				PM11	1.59941	23					PSC	1.8384	47.6	PSC	10.2522	PRI	3	3.11223	639
apt	apontic	FBgn0015903	Cell migration, cell fate specification, STAT signaling inhibition. DNA-binding protein, transcriptional regulator and translational repressor.	ImpL2	2.98235	23.8	PM11	1.37078	10.8								PSC	6.34958	PRI	3	2.9609	642
CG1607	CG1607	FBgn0039844	Amino acid transmembrane transporter	ImpL2	3.56265	38.1	LM2							PSC	1.65568	26.5	PSC	4.27735	PRI	3	2.93297	643
CG8620	CG8620	FBgn0040837	Uncharacterized Drosophila-specific protein.	ImpL2	4.98158	47.6	PM11	2.30267	39.2		PLASM2			PSC	2.09534	91.5	CC		PRI	3	2.88592	644
CG9171	CG9171	FBgn0031738	Glucuronosyltransferase. Protein O-linked mannosylation.				PM11	1.61519	36.5					PSC	1.71169	42.9	PSC	8.26139	PRI	3	2.83727	645
noc	no ocelli	FBgn0005771	C2H2 Zn finger transcription factor. May suppress Notch-induced cell proliferation.	ImpL2	3.47345	28.6	PM11	1.71794	10.8					PSC	1.83657	35.4	PSC	4.94205	PRI	4	2.71282	647
ftz-f1	ftz transcription factor 1	FBgn0001078	Zn finger nuclear receptor. Cofactor to fushi tarazu (ftz). Mutant resistant to Metarhizium (Lu-2015).				PM11	1.59431	12.8					PSC	1.87989	36	PSC	2.19901	PRI	3	1.8749	658
CG15115	CG15115	FBgn0034413	Uncharacterized Drosophila-specific protein. Related to Golgi microtubule-associated protein (Gmap)? Trafficking within the early secretory pathway.											PSC	4.30929	82	PSC	124.336	PRI	2	23.1474	594
fax	failed axon connections	FBgn0014163	Glutathione S-transferase. Interacts with Abelson tyrosine kinase, Abl.	robo2			PM11	3.0348	83.1		PLASM1			PM4			PSC	167.069	PRI	2	22.5172	595
Toll-4	Toll-4	FBgn0032095	Toll-related transmembrane protein. Expressed in the apical part of the embryonic lymph gland precursors.											PSC	1.98269	36.5	PSC	233.662	PRI	2	21.524	598
CG8745	CG8745	FBgn0036381	Ethanolamine-phosphate phospho-lyase. Ethanolamine phosphate + H2O = acetaldehyde + NH3 + phosphate. Nicotine resistance.	ImpL2	7.98848	57.1											PSC	44.1698	PRI	2	18.7843	599
CG6023	CG6023	FBgn0030912	Uncharacterized Drosophila-specific protein.				PM11	15.6073	24.3					PSC	12.9284	87.8			PRI	2	14.2048	604
CG10038	CG10038	FBgn0038013	siRNA binding. Heterochromatin assembly.	ImpL2	16.1078	76.2											PSC	9.29286	PRI	2	12.2347	606
chrb	charybde	FBgn0036165	Inhibits cell growth by regulating the Tor pathway, upstream of the Tsc1-Tsc2 complex and downstream of Akt1. Cell death activator.	ImpL2	7.53951	57.1	PM10										PSC	12.3534	PRI	2	9.65082	609
scyl	scylla	FBgn0041094	Regulation of TOR signaling; and response to oxidative stress.	ImpL2	8.29734	85.7	PM5										PSC	8.88328	PRI	2	8.58531	610
CG10508	CG10508	FBgn0037060	Ubiquitin-binding CUE protein. Regulation of organ growth, hippo signaling, transcription,	ImpL2	3.1986	28.6											PSC	20.7628	PRI	2	8.14935	611
beat-IIb	beaten path Iib	FBgn0038494	Heterophilic cell-cell adhesion.	ImpL2	7.64952	57.1				Pri									PRI	2	7.64952	612
capu	cappuccino	FBgn0000256	Formin family protein, nucleates actin filaments and accelerates their elongation.	ImpL2	5.23245	57.1	LM2							PSC			PSC	5.60976	PRI	2	5.41782	618
dlp	dally-like	FBgn0041604	Glypican, a GPI-anchored heparan sulfate proteoglycan. Positive regulation of Wnt signaling. Modulates FGF signaling. Controls the concentration and distribution of Wnt ligand.	ImpL2	3.32544	28.6								PH2			PSC	7.45372	PRI	2	4.97865	621
Swim	Secreted Wg-interacting molecule	FBgn0034709	wg-binding protein. Spread of the wg protein?				PM11							PSC	1.97464	42.9	PSC	10.1537	PRI	2	4.4777	622
lncRNA:CR43855	long non-coding RNA:CR43855	FBgn0264437	Long non-coding RNA. Overlaps Sema1a.				PM6				PLASM2			PSC	2.63529	97.9	PSC	6.56546	PRI	2	4.15955	623
CG14855	CG14855	FBgn0038260	Solute carrier family 22 (SLC22). Organic cation, anion and zwiterrion/cations transporter. Mutant resistant to Metarhizium (Lu-2015).	ImpL2	3.39424	28.6											PSC	4.2517	PRI	2	3.79885	629
CG6770	CG6770	FBgn0032400	Negative regulation of cell cycle and proliferation, and regulation of transcription.	ImpL2	3.15065	100	PM11				MET						PSC	4.25399	PRI	2	3.66099	631
CG42342	CG42342	FBgn0259244	Collagen, extracellular matrix.				PM11	1.61254	8.1								PSC	7.72843	PRI	2	3.53022	632
ELOVL	ELOVL fatty acid elongase	FBgn0037534	Long-chain fatty acids elongation.	ImpL2	1.9795	14.3											PSC	5.68797	PRI	2	3.35549	634
Ssdp	Sequence-specific single-stranded DNA-binding protein	FBgn0011481	WNT enhancosome. Positive regulator of Wnt-TCF signaling pathway.				PM11	1.6809	29.7								PSC	6.3901	PRI	2	3.27736	637
cpo	couch potato	FBgn0263995	Regulate gene transcription to control neurological and neuroendocrine functions.	ImpL2	2.51096	14.3	CC1				CC						PSC	3.9095	PRI	2	3.13315	638
His4r	Histone H4 replacement	FBgn0013981	Nucleosome assembly. Localized to nucleosome.	ImpL2	4.66872	85.7	PM11										PSC	2.05286	PRI	2	3.09584	640
BNIP3	BNIP3	FBgn0037007	Mitochondrial outer membrane permeabilization and regulation of programmed cell death.	PL3			PM11							PSC	1.94824	58.2	PSC	4.51252	PRI	2	2.96504	641
CG13631	CG13631	FBgn0040600	Small low-complexity peptide	robo2			PM11							PSC	2.01071	73	PSC	3.69878	PRI	2	2.72712	646
PNPase	Polynucleotide phosphorylase	FBgn0039846	Mitochondrial mRNA turnover.											PSC	1.55678	28	PSC	4.41107	PRI	2	2.62051	648
Mdh1	Malate dehydrogenase 1	FBgn0262782	Malate/aspartate shuttle across the mitochondrial membrane.	ImpL2	2.7225	81											PSC	2.51732	PRI	2	2.6179	649
Gadd45	Growth arrest and DNA damage-inducible 45	FBgn0033153	Genetic interaction with JNK pathway; induced by wounding in embryos.	Rel			PM11	2.7253	51.4					PSC	2.49943	91.5	PL2		PRI	2	2.60992	650
odd	odd skipped	FBgn0002985	C2H2 Zn finger transcription factor. Pair rule gene. Maintains prohemocyte potency and blocks blood cell development (Gao 2011).	ImpL2	2.04954	14.3								PH2			PSC	2.95256	PRI	2	2.45996	651
mfas	midline fasciclin	FBgn0260745	Fasciclin-I-related membrane protein. Cell adhesion and signaling.											PSC	1.50855	61.4	PSC	3.89165	PRI	2	2.42296	652
CG13437	CG13437	FBgn0034541	Uncharacterized Diptera-specific protein.											PSC	1.68717	25.9	PSC	2.52125	PRI	2	2.06246	653
Hipk	homeodomain interacting protein kinase	FBgn0035142	DYRK family kinase. Modulates signaling pathways (Wingless, Notch, Hippo, Hedgehog, JNK, and cell death).	robo2										PSC	1.75145	51.3	PSC	2.41895	PRI	2	2.05832	654
edl	ETS-domain lacking	FBgn0023214	Negative regulator of Egfr signaling. Regulates the transcriptional repressor aop.				PM11	2.26783	21.6					PSC	1.86375	45.5	PL2		PRI	2	2.05589	655
Ubi-p5E	Ubiquitin-5E	FBgn0086558	Ubiquitin C homolog.	AMP							AMP			PSC	1.38569	74.6	PSC	2.80968	PRI	2	1.97315	656
pdgy	pudgy	FBgn0027601	Acyl-CoA synthetase. Conjugates fatty acids, destined for beta-oxidation, to CoA. FOXO transcriptional target.				PM11	1.40902	23		MET			PSC			PSC	2.60037	PRI	2	1.91415	657
CHES-1-like	Checkpoint suppressor homologue	FBgn0029504	Transcription factor. Regulates cardiac progenitor cell division and dpp transcription in testis.											PSC	1.4506	36	PSC	2.38815	PRI	2	1.86125	659
CG34353	CG34353	FBgn0085382	Klingon subfamily of wirins. CNS, gravitaxis?				PM11	1.52904	10.1					PSC	1.89764	37			PRI	2	1.7034	660
CG13004	CG13004	FBgn0030797	Uncharacterized Diptera-specific protein.				PM11	1.47537	7.4					PSC	1.6801	29.6			PRI	2	1.57441	661
Mad	Mothers against dpp	FBgn0011648	Transcription factor. Mediates cellular response to the BMP-like ligands Dpp, Scw and Gbb.							Pri									pri	1	–	662
Z600	Z600	FBgn0004052	Mitotic inhibitor that binds to the hydrophobic patch of Cyclins. Switch in cell cycle mode in blastoderm embryos, delaying mitosis.							Pri									pri	1	–	663
asrij	asrij	FBgn0034793	Maintains stemness. Pan-hemocyte marker. Hematopoiesis and immunity. Regulates JAK/STAT positively and Notch negatively.							Pri									pri	1	–	664
Fas1	Fasciclin 1	FBgn0285925	Neurons, homophilic cell adhesion molecule.							Pri				PH1					pri	1	–	665
sm	smooth	FBgn0003435	hnRNP. Multiple functions.				PM10										PSC	84.8617	pri	1	84.8617	666
GILT2	Gamma-interferon-inducible lysosomal thiol reductase 2	FBgn0039099	Thiol reductase. Immune response against bacteria and virus via JAK-STAT signaling.	robo2													PSC	23.3253	pri	1	23.3253	667
CG43102	CG43102	FBgn0262562	Rho Guanine Nucleotide Exchange Factors (RhoGEF) for Rho family GTPases.														PSC	21.8323	pri	1	21.8323	668
Ns4	Nucleostemin 4	FBgn0032882	Ribosome biogenesis, cell proliferation, or cell growth.	ImpL2	14.1404	76.2													pri	1	14.1404	669
NLaz	Neural Lazarillo	FBgn0053126	Lipocalin family extracellular lipid binding protein. Regulated by JNK, negatively regulates insulin signaling.	ImpL2	13.411	100													pri	1	13.411	670
Fem-1	Fem-1	FBgn0034542	Substrate recognition subunit of E3 ubiquitin-protein ligase.														PSC	13.3632	pri	1	13.3632	671
Cpr5C	Cuticular protein 5C	FBgn0029811	Structural constituent of chitin-based larval cuticle or extracellular matrix.														PSC	11.0808	pri	1	11.0808	672
pxb	pxb	FBgn0053207	Smoothened signaling pathway; negative regulation of hemocyte proliferation (Bina-2010).														PSC	10.5689	pri	1	10.5689	673
trol	terribly reduced optic lobes	FBgn0284408	Perlecan, extracellular matrix. Negative regulators FGF Receptor signaling, suppressing ERK kinase (rl) activation.	robo2			PM1										PSC	10.2577	pri	1	10.2577	674
ITP	Ion transport peptide	FBgn0035023	Neurohormones (3 different). Endocrine regulator of water homeostasis. Thirst-promoting and anti-diuretic hormone.				PM11							PSC			PSC	9.7835	pri	1	9.7835	675
Dg	Dystroglycan	FBgn0034072	Non-integrin extracellular matrix receptor. Connects extracellular matrix to actin cytoskeleton.														PSC	9.5489	pri	1	9.5489	676
TkR99D	Tachykinin-like receptor at 99D	FBgn0004622	Tachykinin receptor, regulates stress induced insulin production and signaling. Mutant sensitive to Metarhizium (Lu-2015).														PSC	9.25848	pri	1	9.25848	677
Pvf1	PDGF- and VEGF-related factor 1	FBgn0030964	Cytokine. Pvr ligand. Hemocyte migration. Mutant sensitive to Metarhizium (Lu-2015). Activates Ras/Raf/MAP kinase (ERK) cascade, PI3K kinase pathway, TORC1, Rho family small GTPases (FBrf0221764, FBrf0180198) and the JNK cascade.														PSC	9.21007	pri	1	9.21007	678
CG6024	CG6024	FBgn0036202	Low-density lipoprotein (LDL) receptor.														PSC	8.39321	pri	1	8.39321	679
7SLRNA:CR32864	Signal recognition particle 7SL RNA CR32864	FBgn0000003	SRP-dependent cotranslational protein targeting to endoplasmic reticulum.														PSC	7.66272	pri	1	7.66272	680
CG32521	CG32521	FBgn0052521	Uncharacterized protein (GSPA-rich).	Pcd													PSC	7.58219	pri	1	7.58219	681
Mrtf	Myocardin-related transcription factor	FBgn0052296	Binds and activates bs, and likely other transcription factors. Regulated by free actin levels. Cell stretching and invasive migration.				LM2										PSC	7.53329	pri	1	7.53329	682
brat	brain tumor	FBgn0010300	Tumor suppressor. Regulates proliferation in the brain.	ImpL2	7.39534	76.2	PM11												pri	1	7.39534	683
SP1173	SP1173	FBgn0035710	Major facilitator superfamily.														PSC	7.07439	pri	1	7.07439	684
Pepck1	Phosphoenolpyruvate carboxykinase 1	FBgn0003067	Glucose metabolism.											PSC	7.00138	50.8			pri	1	7.00138	685
Gyg	Glycogenin	FBgn0265191	Glycogenin is an enzyme involved in converting glucose to glycogen. It acts as a primer, by polymerizing the first few glucose molecules, after which other enzymes take over.														PSC	6.35387	pri	1	6.35387	686
Dad	Daughters against dpp	FBgn0020493	Inhibitory SMAD in the BMP/Dpp pathway.														PSC	6.12585	pri	1	6.12585	687
Nup93-1	Nucleoporin 93kD-1	FBgn0027537	Scaffold nucleoporin, important for the integrity of the nuclear pore complex.														PSC	6.08253	pri	1	6.08253	688
vri	vrille	FBgn0016076	bZIP transcription factor, enhancer of dpp phenotypes. Circadian rhythm														PSC	5.72772	pri	1	5.72772	689
CG9338	CG9338	FBgn0032899	Ly6 superfamily. Atilla homolog.	robo2													PSC	5.31887	pri	1	5.31887	690
Eip93F	Ecdysone-induced protein 93F	FBgn0264490	Rho-type guanine nucleotide exchange factor (Eip93F). DNA binding protein. Adult determinant during metamorphosis.	ImpL2	5.26837	61.9				CAH									pri	1	5.26837	691
7SLRNA:CR42652	Signal recognition particle 7SL RNA CR42652	FBgn0261504	SRP-dependent cotranslational protein targeting to endoplasmic reticulum.														PSC	5.19889	pri	1	5.19889	692
Mst84Db	Male-specific RNA 84Db	FBgn0004173	Sperm axoneme assembly.	ImpL2	5.18783	33.3													pri	1	5.18783	693
CG9220	CG9220	FBgn0030662	Glycosylation. Chondroitin sulfate biosynthesis														PSC	5.1482	pri	1	5.1482	694
raw	raw	FBgn0003209	Dendrite patterning and the subcellular localization of JNK signalling components.														PSC	5.04592	pri	1	5.04592	695
Pgm	phosphoglucose mutase	FBgn0003076	Breakdown and synthesis of glucose.														PSC	4.95283	pri	1	4.95283	696
Spn55B	Serpin 55B	FBgn0028983	Serine protease inhibitor.				PM6							PSC			PSC	4.77623	pri	1	4.77623	697
CG6356	CG6356	FBgn0039178	SLC22 type organic cation, organic anion and organic zwiterrion/cation transporter.	PL3													PSC	4.5362	pri	1	4.5362	698
CG33293	CG33293	FBgn0053293	Uncharacterized Drosophila-specific peptide.	ImpL2	4.52321	76.2													pri	1	4.52321	699
Oatp74D	Organic anion transporting polypeptide 74D	FBgn0036732	Uptake of ecdysteroids from the hemolymph.														PSC	4.5205	pri	1	4.5205	700
olf186-M	olf186-M	FBgn0015522	ITPR interacting domain. Relish-dependent induction by E. coli in S2 cells (Valanne-2007).	Rel										PSC			PSC	4.41024	pri	1	4.41024	701
CenG1A	Centaurin γ 1A	FBgn0028509	GTPase, regulating the ecdysone-dependent L2–L3 molt.														PSC	4.39637	pri	1	4.39637	702
CG16713	CG16713	FBgn0031560	Kunitz-type serine protease inhibitor				PM3							PSC	4.391	49.2			pri	1	4.391	703
jim	jim	FBgn0027339	Zn finger C2H2 transcription factor. Chromatin silencing. Increased hemocyte number in mutant (Stofanko 2008).														PSC	4.33103	pri	1	4.33103	704
Dh31-R	Diuretic hormone 31 Receptor	FBgn0052843	G-protein coupled receptor. Ligand is DH31 (CGRP), which triggers intestinal contractions favoring the elimination of opportunistic bacteria. Mutant resistant to Metarhizium (Lu-2015).	ImpL2	3.95374	23.8													pri	1	3.95374	705
Vps13B	Vacuolar protein sorting 13B	FBgn0039727	Mitochondrion organization, protein retention in Golgi, protein targeting to vacuole.														PSC	3.94461	pri	1	3.94461	706
l(2)01289	lethal (2) 01289	FBgn0010482	Thioredoxin														PSC	3.89682	pri	1	3.89682	707
sqh	spaghetti squash	FBgn0003514	Regulatory light chain of nonmuscle type 2 myosin. Rho-Rho Kinase pathway activates myosin motor activity.				LM2							PSC			PSC	3.82838	pri	1	3.82838	708
GstE12	Glutathione S transferase E12	FBgn0027590	Glutathione S transferase. Detoxification.	ImpL2	3.8156	61.9													pri	1	3.8156	709
dve	defective proventriculus	FBgn0020307	CUT homeobox transcription factor. Transcriptional repressor that binds to the K50 site.														PSC	3.7345	pri	1	3.7345	710
GstD1	Glutathione S transferase D1	FBgn0001149	Glutathione S transferase. Detoxification.	ImpL2	3.64345	100	LM2				MET			PH6					pri	1	3.64345	711
CG5535	CG5535	FBgn0036764	Cationic amino acid transporter.				PM11							PSC			PSC	3.62624	pri	1	3.62624	712
Oda	Ornithine decarboxylase antizyme	FBgn0014184	Modifies ornithine decarboxylase activity. Enhances protein catabolism.				PM11							PSC			PSC	3.59076	pri	1	3.59076	713
CG6891	CG6891	FBgn0030955	Actin-depolymerising factor.				LM2				PLASM1			PM4			PSC	3.54784	pri	1	3.54784	714
sug	sugarbabe	FBgn0033782	Transcription factor. Expression of insulin-like peptides, lipid and carbohydrate metabolism, nutrient and starvation response.														PSC	3.45668	pri	1	3.45668	715
Atf3	Activating transcription factor 3	FBgn0028550	Transcription factor. Interacts with Jra. Regulates nutrient balance, affects immune gene expression.	PL3			PM11										PSC	3.42718	pri	1	3.42718	716
CG16791	CG16791	FBgn0038881	Uncharacterized insect protein.														PSC	3.35983	pri	1	3.35983	717
Dif	Dorsal-related immunity factor	FBgn0011274	Rel family transcription factor. Toll pathway, immunity.				PM11										PSC	3.32388	pri	1	3.32388	718
h	hairy	FBgn0001168	bHLH transcriptional repressor.	PL3										PSC	3.30731	68.3			pri	1	3.30731	719
Sema1a	Semaphorin 1a	FBgn0011259	Short-range signaling protein. Targeting the plexin receptors. Negative chemotaxis. Mutant resistant to Metarhizium (Lu-2015) and sensitive to P. rettgeri (Unckless-15).	robo2													PSC	3.27491	pri	1	3.27491	720
TBPH	TAR DNA-binding protein-43 homolog	FBgn0025790	hnRNP family RNA-binding protein. Synaptic growth of motor neurons and glial wrapping.														PSC	3.25323	pri	1	3.25323	721
slmb	supernumerary limbs	FBgn0283468	SCF (Skp/Cullin/F-box) E3 ubiquitin-ligase, providing substrate specificity. Proteasome-mediated cleavage of arm and ci (Wg and Hh signaling), SAK, per and Cap-H2.				PM11							PSC			PSC	3.23167	pri	1	3.23167	722
RhoGAP16F	Rho GTPase activating protein at 16F	FBgn0030893	Rho GTPase activating protein. Signal transduction.														PSC	3.21683	pri	1	3.21683	723
CG10082	CG10082	FBgn0034644	Inositol hexakisphosphate kinase.														PSC	3.19534	pri	1	3.19534	724
NetB	Netrin-B	FBgn0015774	Secreted factors that provide instructive guidance cues in axonogenesis.	ImpL2	3.12988	23.8								PH2					pri	1	3.12988	725
drm	drumstick	FBgn0024244	Odd-skipped (Odd) family Zn finger protein. Acting downstream of Notch.														PSC	3.08412	pri	1	3.08412	726
hdc	headcase	FBgn0010113	Encodes two proteins by translational readthrough. Mitotic activation of imaginal tissue.														PSC	2.99869	pri	1	2.99869	727
CG15365	CG15365	FBgn0030077	Leucine zipper putative tumor suppressor														PSC	2.99832	pri	1	2.99832	728
Rbp1-like	Rbp1-like	FBgn0030479	mRNA binding. Rregulation of alternative mRNA splicing, 3'-end processing, and transcriptional start site selection.														PSC	2.96591	pri	1	2.96591	729
PCB	Pyruvate carboxylase	FBgn0027580	Pyruvate carboxylase. Biotin carboxylase.														PSC	2.96001	pri	1	2.96001	730
BEAF-32	Boundary element-associated factor of 32kD	FBgn0015602	DNA-binding protein; chromatin domain insulator, gene regulation, genome organization.														PSC	2.93116	pri	1	2.93116	731
Cad88C	Cadherin 88C	FBgn0038247	Transmembrane protein, mediates cell-cell adhesion and/or cell-cell communication.	ImpL2	2.90633	23.8													pri	1	2.90633	732
CG10376	CG10376	FBgn0032702	Magnesium-dependent protein serine/threonine phosphatase, negative regulation of protein kinase.				PM6										PSC	2.90401	pri	1	2.90401	733
Akap200	A kinase anchor protein 200	FBgn0027932	Scaffolding protein, regulating Protein Kinase A. Notch signaling, organization of the actin cytoskeleton.	robo2			PM11							PM4			PSC	2.89014	pri	1	2.89014	734
CG30283	CG30283	FBgn0260477	Serine protease. Exported.	ImpL2	2.88815	23.8													pri	1	2.88815	735
Hex-A	Hexokinase A	FBgn0001186	Glycolysis, glucose metabolism.				PM10							PSC			PSC	2.87227	pri	1	2.87227	736
Kr-h1	Kruppel homolog 1	FBgn0266450	Transcriptional regulator. Function is linked to that of 20-hydroxyecdysone.														PSC	2.81493	pri	1	2.81493	737
trx	trithorax	FBgn0003862	Chromatin-modifying enzyme, antagonises silencing by Polycomb group.														PSC	2.80334	pri	1	2.80334	738
Egfr	Epidermal growth factor receptor	FBgn0003731	Transmembrane tyrosine kinase receptor for TGFα family ligands (grk, spi, vn, and Krn).														PSC	2.68857	pri	1	2.68857	739
sli	slit	FBgn0264089	Secreted glycoprotein. Ligand for the Robo receptor and co-receptors, including Sdc and Dscam1.	ImpL2	2.68764	19													pri	1	2.68764	740
cv-2	crossveinless 2	FBgn0000395	Secreted protein that binds BMPs, the BMP receptor tkv and Heparan Sulfate Proteoglycans, either promoting or inhibiting BMP signaling.	ImpL2	2.65841	28.6	PM12										PSC		pri	1	2.65841	741
CG2841	proximal to raf	FBgn0003159	Uncharacterized protein.	ImpL2	2.65526	19													pri	1	2.65526	742
GILT3	Gamma-interferon-inducible lysosomal thiol reductase 3	FBgn0039098	Disulfide oxidoreductase. Immune response (Kongton 2014). Reducing disulfide bonds of endocytosed proteins and facilitating their unfolding and optimal degradation.				PM6										PSC	2.60958	pri	1	2.60958	743
ko	knockout	FBgn0020294	Regulation of transcription.														PSC	2.60309	pri	1	2.60309	744
Smox	Smad on X	FBgn0025800	Transcription factor that mediates Activin-β signalling, via the receptor babo.				PM11										PSC	2.58259	pri	1	2.58259	745
Cyp6a20	CG10245	FBgn0033980	Cytochrome P450. May degrade aggression-promoting pheromones.														PSC	2.5629	pri	1	2.5629	746
snRNA:7SK	small nuclear RNA 7SK	FBgn0065099															PSC	2.56256	pri	1	2.56256	747
neur	neuralized	FBgn0002932															PSC	2.55445	pri	1	2.55445	748
Catsup	Catecholamines up	FBgn0002022															PSC	2.51041	pri	1	2.51041	749
lncRNA:CR44933		FBgn0266238															PSC	2.49394	pri	1	2.49394	750
CG8097	CG8097	FBgn0030660	Arginine--tRNA ligase														PSC	2.44772	pri	1	2.44772	751
Nost	Nostrin	FBgn0259734	Makes contact with microtubules through the kinesin Khc-73 for trafficking of recycling endosomes. Regulation of adherens junction organization.														PSC	2.44302	pri	1	2.44302	752
tobi	target of brain insulin	FBgn0261575															PSC	2.43802	pri	1	2.43802	753
CG2811	CG2811	FBgn0035082															PSC	2.41198	pri	1	2.41198	754
l(2)k09913	lethal (2) k09913	FBgn0021979	Similar to human Transmembrane protein 53. Alpha/Beta hydrolase fold.				PM10										PSC	2.40383	pri	1	2.40383	755
yuri	yuri gagarin	FBgn0045842	Coiled-coil protein. Maintains association of the basal body and spermatid nucleus. Gravitaxis.														PSC	2.39357	pri	1	2.39357	756
CG17839	CG17839	FBgn0036454	Multiple fibronectin and immunoglobulin domain transmembrane protein.	ImpL2	2.36737	19	PM12												pri	1	2.36737	757
kraken	kraken	FBgn0020545	Serine hydrolase. Detoxification and digestion?				PM6							PSC			PSC	2.35984	pri	1	2.35984	758
Pgant2	polypeptide GalNAc transferase 2	FBgn0031530															PSC	2.35231	pri	1	2.35231	759
Kif19A	Kinesin family member 19A ortholog	FBgn0038205	ATP-dependent microtubule motor. Transporting organelles, protein complexes, mRNAs and the movement of spindles and chromosomes during cell division.	ImpL2	2.34474	19													pri	1	2.34474	760
GABA-B-R1	metabotropic GABA-B receptor subtype 1	FBgn0260446	G protein-coupled GABA (gamma-aminobutyric acid) receptor.	ImpL2	2.331	19													pri	1	2.331	761
CG42258	CG42258	FBgn0259143	Uncharacterized protein.														PSC	2.31239	pri	1	2.31239	762
MstProx	MstProx	FBgn0015770	(=Toll-3). Contradictory: not known to activate canonical Toll signaling (Levin-2017), but activates Drs expression (Chowdhury-2019).											PSC	2.30335	33.3			pri	1	2.30335	763
lncRNA:CR40469	long non-coding RNA:CR40469	FBgn0058469	Long non-coding RNA.				PM11	2.29054	45.9										pri	1	2.29054	764
CG7841	CG7841	FBgn0036502	MAPK-regulated corepressor-interacting protein.	ImpL2	2.2821	14.3													pri	1	2.2821	765
CG2201	CG2201	FBgn0032955	Choline kinase. Phosphatidylcholine biosynthesis.														PSC	2.27901	pri	1	2.27901	766
CG3770	CG3770	FBgn0035085	Lipoma HMGIC fusion partner-like protein, NOT establishment of glial blood-brain barrier.														PSC	2.27503	pri	1	2.27503	767
pico	CG11940	FBgn0261811															PSC	2.26428	pri	1	2.26428	768
scu	scully	FBgn0021765	Steroid dehydrogenase. May function in mitochondrial tRNA maturation.														PSC	2.24536	pri	1	2.24536	769
T48	Transcript 48	FBgn0004359	Contributes to apical constriction during gastrulation.	ImpL2	2.23696	19													pri	1	2.23696	770
Ubi-p63E	Ubiquitin-63E	FBgn0003943	Polyubiquitin precursor, gives ten ubiquitin molecules after processing. Protein degradation.														PSC	2.21848	pri	1	2.21848	771
β-Spec	β Spectrin	FBgn0250788															PSC	2.20131	pri	1	2.20131	772
AGBE	1,4-Alpha-Glucan Branching Enzyme	FBgn0053138															PSC	2.19152	pri	1	2.19152	773
comm	commissureless	FBgn0010105	Regulates cell surface localization of Robo axon guidance receptors, intercepting them in the ER/Golgi during exocytosis or removing them by endocytosis.														PSC	2.17896	pri	1	2.17896	774
PyK	Pyruvate kinase	FBgn0267385	Glycolysis, response to sucrose.				PM10										PSC	2.17361	pri	1	2.17361	775
CG10205		FBgn0033970															PSC	2.16827	pri	1	2.16827	776
dtn	CG14446	FBgn0262730															PSC	2.15951	pri	1	2.15951	777
Tm1	Tropomyosin 1	FBgn0003721	Calcium-dependent regulation of muscle contraction.														PSC	2.12727	pri	1	2.12727	778
Pits	Protein interacting with Ttk69 and Sin3A	FBgn0030400	Interacts with histone deacetylation proteins Ttk69 and Sin3A.				LM2							PSC			PSC	2.10162	pri	1	2.10162	779
L2HGDH	L-2-hydroxyglutarate dehydrogenase	FBgn0032729															PSC	2.07961	pri	1	2.07961	780
Flo2	Flotillin 2	FBgn0264078															PSC	2.079	pri	1	2.079	781
CG5793	CG5793	FBgn0038858	Similar to human acylpyruvase FAHD1, mitochondrial isoform 2. Catalyzes 3-acylpyruvate + H2O → carboxylate + pyruvate, and oxaloacetate → pyruvate + CO2.														PSC	2.06737	pri	1	2.06737	782
side	sidestep	FBgn0016061	Transmembrane protein of the immunoglobulin superfamily that is expressed in a defined spatiotemporal pattern in glial cells, sensory neurons and muscles. Side functions as an attractive guidance cue to guide motor axons to their target regions.														PSC	2.06518	pri	1	2.06518	783
CG1722	CG1722	FBgn0031168															PSC	2.06472	pri	1	2.06472	784
Gug	Grunge	FBgn0010825															PSC	2.06245	pri	1	2.06245	785
Idh3a	Isocitrate dehydrogenase 3a	FBgn0027291					PM9										PSC	2.04787	pri	1	2.04787	786
Wdr62	WD repeat domain 62	FBgn0031374	WD40 repeat; Quinoprotein alcohol dehydrogenase-like superfamily. Regulation of mitotic cell cycle. Mutant resistant to Metarhizium (Lu-2015).											Adi			PSC	2.04259	pri	1	2.04259	787
Unc-115a	CG31352	FBgn0051352															PSC	2.03098	pri	1	2.03098	788
Sirt1	CG5216	FBgn0024291															PSC	2.02949	pri	1	2.02949	789
snRNA:U2:14B		FBgn0003920															PSC	2.02464	pri	1	2.02464	790
CG6051	CG6051	FBgn0039492		Rel										PSC			PSC	2.0146	pri	1	2.0146	791
Cht2	Chitinase 2	FBgn0022702	Cuticle development. Wound healing.	robo2													PSC	2.0057	pri	1	2.0057	792
row	relative of woc	FBgn0033998	C2H2 zinc finger transcription regulator.														PSC	2.00473	pri	1	2.00473	793
CG18787	CG18787	FBgn0042125	Nucleoporin? ZnF_C3H1 and Nucleoporin_FG domain-containing protein.	ImpL2	1.94012	14.3													pri	1	1.94012	794
H	Hairless	FBgn0001169					PM11	1.9313	39.2										pri	1	1.9313	795
SCaMC	Short Calcium-binding Mitochondrial Carrier	FBgn0052103		Rel			PM11							PSC	1.74944	72			pri	1	1.74944	796
pAbp	poly(A) binding protein	FBgn0265297	RNA-binding protein. Translational regulation and nonsense-mediated mRNA decay.	ImpL2	1.73523	100													pri	1	1.73523	797
Dys	Dystrophin	FBgn0260003	Mutant sensitive to Metarhizium (Lu-2015).											PSC	1.72485	41.3			pri	1	1.72485	798
Dg	Dystroglycan	FBgn0034072	Non-integrin extracellular matrix receptor. Connects ECM to actin cytoskeleton.				PM11	1.62248	18.2										pri	1	1.62248	799
Ance-2	Ance-2	FBgn0032535	Dipeptidyl-peptidase. Angiotensin converting enzyme-like.	Pcd			PM11	1.56761	9.5	Tha				PSC					pri	1	1.56761	800
CG43736	CG43736	FBgn0263993	Uncharacterized insect protein.											PSC	1.5572	53.4			pri	1	1.5572	801
CG34376	CG34376	FBgn0085405	C2H2 Zn finger transcription factor.											PSC	1.53074	28			pri	1	1.53074	802
CG46339	slamdance	FBgn0285963					PM11	1.48373	43.9										pri	1	1.48373	803
CG2918	CG2918	FBgn0023529	Atypical hsp70 chaperone, similar to 150 kDa oxygen-regulated protein ORP150, has a pivotal role in cytoprotective cellular mechanisms triggered by oxygen deprivation. May play a role as a molecular chaperone and participate in protein folding											PSC	1.4625	58.7	X		pri	1	1.4625	804
Nab2	CG5720	FBgn0028471					PM11	1.45474	12.2										pri	1	1.45474	805
CG33229	CG33229	FBgn0053229												PSC	1.4543	27			pri	1	1.4543	806
simj	simjang	FBgn0010762					PM11	1.4449	20.3										pri	1	1.4449	807
nompC	no mechanoreceptor potential C	FBgn0016920	Mechanosensitive non-selective cation channel. Sensory neurons, hearing.				PM11	1.44246	8.1										pri	1	1.44246	808
ArfGAP1	ADPbosylation factor GTPase activating protein 1	FBgn0020655					PM11	1.41598	16.9										pri	1	1.41598	809
Imp	IGF-II mRNA-binding protein	FBgn0285926		Rel			PM10							PSC	1.39542	84.7			pri	1	1.39542	810
CG13086	CG13086	FBgn0032770					PM11	1.38325	10.1										pri	1	1.38325	811
TAF1C-like	TATA box-binding protein-associated factor RNA polymerase I subunit C-like	FBgn0034631					PM11	1.3734	6.8										pri	1	1.3734	812
plum	CG6490	FBgn0039431					PM11	1.36841	9.5										pri	1	1.36841	813
Syn1	Syntrophin-like 1	FBgn0037130	Mutant sensitive to Metarhizium (Lu-2015). Adaptor protein associated with the Dystrophin glycoprotein complex.				PM11	1.36701	14.9					CC1			X		pri	1	1.36701	814
CLIP-190	Cytoplasmic linker protein 190	FBgn0020503					PM11	1.35368	12.8										pri	1	1.35368	815

## Sheet: Plasmatocytes
Plasmatocytes				scRNAseq: fold enrichment ("FC") and % representation
Characteristic genes				Cattenoz			Tattikota			Fu	Leitão			Cho			subclusters			Girard		Summary	Mean
Symbol	Name	FlyBase ID	Description	Clust	FC	%	Clust	FC	%	Clust	Clust	FC	%	Clust	FC	%	Clust	FC	%	Clust	Fold	Class	n	FC	MAX
CG8501	CG8501	FBgn0033724	Ly6 superfamily. Atilla (distant) homolog.	robo2	1.51757	100	PM12	2.10236	100		PLASM1	4.21912	99.2	PM	2.62916	49.1	PM4	4.68214	100	PL2	4.39231	PC	3	2.74358	4.39231	1
Hml	Hemolectin	FBgn0029167	Chitin binding multidomain receptor. Mutant sensitive to Metarhizium (Lu-2015).	prolif	4.29453	95.5	PM12	1.85287	100		PLASM1	3.10978	98.8	PM	2.3854	92.7	PM1	2.57489	98	PL2	2.52666	PC	3	2.72094	4.29453	2
Ppn	Papilin	FBgn0003137	Extracellular matrix. Cell rearrangements, modulating metalloproteinases.	prolif	5.22757	79.5	PM12	1.39765	100	Ppn	PLASM1	2.17689	99.7	PM	2.62874	78.8	PM1	2.89422	89.1	PL2	2.90376	PC	3	2.61125	5.22757	3
Col4a1	Collagen type IV	FBgn0000299	Subunit of Collagen IV and a major component of basement membranes.	prolif	2.15117	93.2	PM9	1.58429	96.1		PLASM1	2.21253	96.1	PM	3.72642	86.7	PM1	2.06904	84.2	PL2	2.87782	PC	3	2.40742	3.72642	4
Glt	Glutactin	FBgn0001114	Cross-links blood clot. Basement membrane-related glycoprotein, sequence similarity to serine esterases.	PL0	1.38519	99.6	PM12	1.57304	100		PLASM1	2.96391	94.7	PM	3.63362	84.7	PM3	2.10342	99.1	PL2	3.33356	PC	3	2.39151	3.63362	5
CG34437	CG34437	FBgn0085466	Serine pseudoprotease, wasp-induced (2-5-fold , Shannon).	prolif	3.47616	68.2	PM12	2.03147	99.2		PLASM1	1.73019	96.5	PM	1.8278	56.8	PM1	1.56762	57.4	PL2	2.77618	PC	3	2.28284	3.47616	6
Ten-m	Tenascin major	FBgn0004449	Homo- and heterotypic cell-cell adhesion.				PM10	1.48805	76.1		PLASM1	2.08098	85.5	PM	1.51286	42.9	PM3	1.68006	75.9	PL2	5.75924	PC	3	2.2791	5.75924	7
fat-spondin	fat-spondin	FBgn0026721	Thrombospondin. Serine protease inhibitor, Kunitz type. Present in Drosophila plasma (Karlsson 2004).	robo2	2.85425	99	PM12	1.64022	98.5		PLASM1	2.37521	85.5	PM	1.57774	26.5	PM3	2.65334	84.2	PL2	3.22658	PC	3	2.24169	3.22658	8
Pxn	Peroxidasin	FBgn0011828	Hemocyte-specific. Mutant sensitive to Metarhizium (Lu-2015). Extracellular matrix consolidation, phagocytosis and defense.	prolif	1.87318	95.5	PM12	1.95944	100	PM	PLASM1	2.31763	96.7	PM	2.6922	88.1	PM1	2.10243	88	PL2	2.45414	PC	3	2.23848	2.6922	9
vkg	viking	FBgn0016075	Subunit of Collagen IV and a major component of basement membranes.	Inos	1.99597	69.7	PM9	1.64015	95.1		PLASM1	1.49367	85.1	PM	3.00635	80.5	PM1	2.18986	79.1	PL2	2.96907	PC	3	2.12809	3.00635	10
NimC1	Nimrod C1	FBgn0259896	Nimrod family. Phagocytosis receptor.	PL3	1.86074	74.7	PM3	1.73292	43.3		PLASM1	2.8646	94.4	PM	2.11875	54.4	PM2	1.75722	77.2	PL2	2.02395	PC	3	2.08719	2.8646	11
SPARC	Secreted protein, acidic, cysteine-rich	FBgn0026562	Secreted basement membrane glycoprotein. Prevents apoptosis in "looser" cells. Hemocyte-derived SPARC is required for collagen-IV-dependent stability.	PL3	1.39426	96.6	PM9	1.47837	95.9		PLASM1	2.23866	98.3	PM	3.38151	97.1	PM1	1.90791	96.4	PL2	2.37332	PC	3	2.05928	3.38151	12
LanB2	Laminin B2	FBgn0267348	Extracellular matrix. Basement membrane assembly.				PM10	1.54211	88.5		PLASM1	1.87279	95.5	PM	1.65932	54.1	PM3	1.41915	73.1	PL2	3.52162	PC	3	2.02684	3.52162	13
NimB4	Nimrod B4	FBgn0028542	Exported Nimrod protein. Function unknown.	Inos	2.48066	75.6	PM12	2.15408	100	Ppn	PLASM1	1.4904	83.7	PM	1.94545	82.5	PM2	1.75368	95.8	PL2	2.13585	PC	3	2.01347	2.48066	14
LanB1	LanB1	FBgn0261800	Extracellular matrix. Basement membrane assembly. Positive regulation of innate immune response (Cronin 2009).				PM12	1.71129	100		PLASM1	2.02077	95.7	PM	1.82413	85.2	PM1	1.65275	85.3	PL2	2.38743	PC	3	1.96996	2.38743	15
NtR	NtR	FBgn0029147	Neurotransmitter-gated ion-channel.	robo2	1.29813	73.6	PM12	1.67201	98.5		PLASM1	2.19736	91.1	PM	2.20598	73.7	PM1	1.85422	72.9	PL2	2.79193	PC	3	1.96604	2.79193	16
CG1092	CG1092	FBgn0037228	Uncharacterized Drosophila-specific protein.	PL3	1.3779	42.3	PM12	1.91627	100		PLASM1	1.80881	86	PM	2.37815	78.2	PM2	1.75468	94	PL2	2.54392	PC	3	1.95958	2.54392	17
CG17574	CG17574	FBgn0033777	Uncharacterized. Related to shisa, in many organisms.								PLASM1	1.77014	90.1	PM	1.56527	73.3	PM2	1.40621	84.9	PL2	2.69468	PC	3	1.9545	2.69468	18
Tig	Tiggrin	FBgn0011722	Extracellular matrix protein and integrin ligand. Accumulates at muscle attachment sites.	Inos	1.59956	41.9	PM12	1.61453	93.9	Ppn	PLASM1	1.37494	85.2	PM	1.66412	50	PM1	1.57062	51.6	PL2	3.83415	PC	3	1.86654	3.83415	19
eater	eater	FBgn0243514	Nimrod family. Phagocytosis receptor.	PL3	2.03941	62.8	PM12	1.73727	99.2	Ppn	PLASM1	1.50491	77.7	PM	1.71688	75.7	PM3	1.76743	90.8	PL2	2.39465	PC	3	1.85427	2.39465	20
CG42711	CG42711	FBgn0261628	Uncharacterized Drosophila-specific protein.	PL3	1.59548	27.9	PM12	1.52317	94.7		PLASM1	1.97977	85.8	PM	1.72141	44.6	PM2	1.55368	62.2	PL2	2.27847	PC	3	1.79952	2.27847	21
LanA	Laminin A	FBgn0002526	Extracellular matrix. Binds integrin alpha-PS3/beta-nu and Fak.	PL0	1.36112	92.9	PM10	1.44248	90.1		PLASM1	2.06325	94.7	PM	1.70923	72.2	PM1	1.66948	73.1	PL2	2.46532	PC	3	1.76379	2.46532	22
Sr-CI	Scavenger receptor class C, type I	FBgn0014033	Polysaccharide-binding scavenger receptor. Phagocytosis, endocytosis	prolif	3.12396	90.9	PM12	1.49172	100	Ppn				PM	2.61432	75.4	PM1	1.86159	74.8	PL2	2.76944	PC	2	2.41011	3.12396	23
CG43799	CG43799	FBgn0264343	Poorly conserved mucin. "Oriental" subgroup only.				PM12	1.35673	77.9		PLASM1	1.62841	91.6							PL2	4.45159	PC	2	2.14252	4.45159	24
CG4829	CG4829	FBgn0030796	Gamma-glutamyltransferase. Glutathione metabolism.	prolif	1.42615	15.9					PLASM1	2.22403	91.8							PL2	2.7682	PC	2	2.06301	2.7682	25
CG9372	CG9372	FBgn0036891	Serine protease. Snake & spirit-related. Clip domain, exported.				PM12	1.44879	96.2					PM	2.02267	75	PM3	1.50261	88	PL2	2.96346	PC	2	2.05547	2.96346	26
CG34331	CG34331	FBgn0085360	Uncharacterized Drosophila-specific protein.	PL3	1.59419	53.1	PM12	1.988	99.2					PM	2.62192	86.3	PM1	1.86081	85.5	PL2	2.11665	PC	2	2.04789	2.62192	27
CG3328	CG3328	FBgn0034985	Myelin regulatory factor-like. Uncharacterized				PM10	1.36016	39.5					PM	1.41624	27.2				PL2	4.20668	PC	2	2.00858	4.20668	28
Inos	myo-inositol-1-phosphate synthase	FBgn0025885	Inositol biosynthesis.	Inos	3.97774	90.6	PM12	1.81618	99.2		PLASM2	1.4503	91.2	PM	1.46622	70.2	PM2	1.64038	91	PL2	2.07313	PC	2	2	3.97774	29
Pgant9	Polypeptide N-Acetylgalactosaminyltransferase 9	FBgn0050463	O-linked oligosaccharide biosynthesis.				PM12	1.64608	90.1					PM	1.35115	34	PM1	1.35586	36.4	PL2	3.50632	PC	2	1.98306	3.50632	30
pigs	pickled eggs	FBgn0029881	Gas2-like, actin filament-binding protein. Restricts Notch activation											PM	1.39901	41.2				PL2	2.75788	PC	2	1.96425	2.75788	31
PGRP-SA	Peptidoglycan recognition protein SA	FBgn0030310	Peptidoglycan recognition protein SA	Rel	1.48598	13	PM3	1.43598	20		AMP	2.38837	69.3	PM	1.56468	45.9	PM2	1.52578	64.3	PL2	3.44175	PC	2	1.93952	3.44175	32
CG34054	CG34054	FBgn0054054	Low-complexity peptide (Thr,Pro-rich). 7-Cys C-terminal domain.CG30026-related.											PM	1.6753	31.9	PM1	1.84079	39.8	PL2	2.15135	PC	2	1.89846	2.15135	33
Had2	β Hydroxy acid dehydrogenase 2	FBgn0033949	3-hydroxyacyl-CoA dehydrogenase. Fatty acid metabolism. Tumor immunity?	PL1	1.33614	99.9	PM12	1.55866	93.9		PLASM1	1.99736	84	Adi	2.21084	84.8	PM3	2.99202	96.9	PL2	2.68079	PC	2	1.89835	2.68079	34
PH4αEFB	prolyl-4-hydroxylase-α EFB	FBgn0039776	Procollagen-proline 4-dioxygenase.				PM12	1.61771	84.7		PLASM1	1.8125	94							PL2	2.32641	PC	2	1.89651	2.32641	35
Plod	procollagen lysyl hydroxylase	FBgn0036147	Required for Collagen IV secretion from haemocytes and fat body.				PM12	1.46071	90.8					PM	1.39239	69.4				PL2	3.05479	PC	2	1.83838	3.05479	36
kuz	kuzbanian	FBgn0259984	ADAM metalloendopeptidase. Activation of N and robo1 by cleavage.	robo2	1.55412	96.7								PM	1.64635	75.3	PM4	1.70175	95.3	PL2	2.39983	PC	2	1.83117	2.39983	37
ena	enabled	FBgn0000578	Ena/VASP family. Processive actin polymerase, stimulating actin addition at the barbed end.	PL2	1.59016	88	PM12	1.35841	77.9	CAH	PLASM1	1.61582	80.3				PM4	1.88401	90.3	PL2	3.2075	PC	2	1.82919	3.2075	38
nAChRβ3	nicotinic Acetylcholine Receptor β3	FBgn0031261	Fast responses to acetylcholine (ACh).				PM12	2.00687	98.5		PLASM1	1.9029	95.6	PM	1.58542	75.2	PM1	1.38688	72.5			PC	2	1.82261	2.00687	39
CG5397	CG5397	FBgn0031327	Carboxylesterase. Hydrolysis of carboxylic esters.	PL3	1.35594	98.5	PM12	1.52688	98.5		PLASM1	2.26153	94.6	PM	1.5775	46.8	PM3	1.50797	69.1	IZ	2.66209	PC	2	1.81438	2.66209	40
spz	spatzle	FBgn0003495	Toll ligand. Activated by extracellular serine proteases (ea or SPE).	Inos	1.56181	40.6								PM	1.70122	89.4	PM1	1.5877	89.9	PL2	2.20503	PC	2	1.80274	2.20503	41
CG31673	CG31673	FBgn0051673	Glycerate dehydrogenase. General metabolism.											PM	1.38896	40.1	PM2	1.48862	65.3	PL2	2.31427	PC	2	1.79288	2.31427	42
CG5958	CG5958	FBgn0031913	Phosphatidylinositol bisphosphate-binding. Light response.				PM12	1.40545	67.9		PLASM1	1.73102	92.4							PL2	2.30181	PC	2	1.77581	2.30181	43
lectin-24Db	lectin-24Db	FBgn0040102	Galactose-specific Ca-dependent lectin. Binds to hemocytes, enhances encapsulation and melanization, and agglutinates E.coli.	Pcd	1.62826	79.5	PM12	1.47265	92.4		PLASM1	1.38431	70.8	Adi	1.78764	80.9	PM4	1.97749	94	PL2	2.68084	PC	2	1.73909	2.68084	44
cv-d	crossveinless d	FBgn0265048	Vitellogenin-like lipoprotein family. Can bind lipids and members of the BMP protein family.	Inos	1.75822	30.3					PLASM1	1.37726	85							PL2	2.06309	PC	2	1.7095	2.06309	45
CG5973	CG5973	FBgn0031914	Lipid transfer protein? Foxo target (Erkosar-17).	PL3	1.31988	29.8	PM12	1.36298	74		MET	1.4661	66.6	PM	1.37665	32.6				PL2	2.77159	PC	2	1.58689	2.77159	46
rogdi	rogdi	FBgn0036697	Promoting sleep by controlling GABA transmission in GABA neurons. GABAergic control of dopaminergic pathway.																	PL2	2.99164	PC	1	2.99164	2.99164	47
sty	sprouty	FBgn0014388	Mutant sensitive to Metarhizium (Lu-2015).														PM1	1.39278	79	PL2	2.88795	PC	1	2.88795	2.88795	48
wge	winged eye	FBgn0051151	Localizes to the histone locus body and regulates histone expression to ensure genomic stability. Determination of disk-specific identity, downstream of Hox genes.																	PL2	2.84125	PC	1	2.84125	2.84125	49
Spred	Sprouty-related protein with EVH-1 domain	FBgn0020767	Negative regulation of ERK1 and ERK2.																	PL2	2.68546	PC	1	2.68546	2.68546	50
CG42566	CG42566	FBgn0260768	Short membrane peptide. LITAF-like zinc ribbon domain; a compact Zn2+-binding structure.				PM6	2.78744	92.8		PLASM1	1.4725	95.4	PH	2.29662	95.1	PH4	1.91102	96.1	PP	5.25817	PC	1	2.65336	5.25817	51
Pde8	Phosphodiesterase 8	FBgn0266377	Degrades cAMP, protecting Raf-1 from inhibitory phosphorylation by PKA, thereby stimulating ERK signaling and the cellular response to EGF.																	PL2	2.55824	PC	1	2.55824	2.55824	52
Rgl	Ral guanine nucleotide dissociation stimulator-like ortholog (M. musculus)	FBgn0026376	RasGEF. Guanine Nucleotide Exchange Factor (GEFs) for Ras family GTPase.																	PL2	2.51417	PC	1	2.51417	2.51417	53
Cpr50Cb	Cuticular protein 50Cb	FBgn0033869	Chitin-based larval cuticle.																	PL2	2.47393	PC	1	2.47393	2.47393	54
hui	hase und igel	FBgn0033968	Uncharacterized exported (or transmembrane) protein. Wing development.	Rel	1.8485	50.2											PH1	1.84019	32.1	PL2	3.29133	PC	1	2.46658	3.29133	55
GstD7	Glutathione S transferase D7	FBgn0010043	Glutathione S transferase. Detoxification.														PM1	1.40227	33.8	PL2	2.43458	PC	1	2.43458	2.43458	56
imd	immune deficiency	FBgn0013983	Relish activation. Imd pathway of antibacterial response.																	PL2	2.41849	PC	1	2.41849	2.41849	57
Dap160	Dynamin associated protein 160	FBgn0023388	Adaptor protein. Contributes to endocytosis. Regulates Notch signaling.														PM4	1.35599	66	PL2	2.41212	PC	1	2.41212	2.41212	58
RhoGAP92B	Rho GTPase activating protein at 92B	FBgn0038747	GTPase activator of Rho-type GTPases.																	PL2	2.36371	PC	1	2.36371	2.36371	59
CG5854	CG5854	FBgn0039130	Methionine adenosyltransferase-like. NAD dependent epimerase/dehydratase family.											Adi	1.89165	78.7	PM4	2.60336	96.9	PL2	2.88299	PC	1	2.3353	2.88299	60
Mhcl	Myosin heavy chain-like	FBgn0026059	Localizes at cell contact sites during myoblast fusion. Interacts in vitro with Rolling pebbles 7.																	PL2	2.32033	PC	1	2.32033	2.32033	61
MFS15	Major Facilitator Superfamily Transporter 15	FBgn0034392	Transmembrane transporter of amino acids (glutamate and aspartate), nucleotides and organic anions.																	PL2	2.32025	PC	1	2.32025	2.32025	62
CG15083	CG15083	FBgn0034399	Uncharacterized Drosophila-specific protein.																	PL2	2.26554	PC	1	2.26554	2.26554	63
Rabex-5	Rabaptin-5-associated exchange factor for Rab5 ortholog (H. sapiens)	FBgn0262937	RabGEF, G Exchange Factor for Rab GTPases. Regulation of endosome size.	Rel	1.57994	63.8											PM4	1.4196	74.5	PL2	3.23735	PC	1	2.2616	3.23735	64
CG8300	CG8300	FBgn0029937	Uncharacterized conseved protein.														PM2	1.49181	83.6	PL2	2.2488	PC	1	2.2488	2.2488	65
chn	charlatan	FBgn0015371	C2H2 zinc-finger transcription factor, regulates emc, h, ac, Dl, and others.				PM3	1.7495	34.4											PL2	2.85517	PC	1	2.23498	2.85517	66
Gclc	Glutamate-cysteine ligase catalytic subunit	FBgn0040319	Glutamate-cysteine ligase. Glutathione biosynthesis.	vir1	2.57109	49.4	PM6	2.08073	64.4											PL2	2.02702	PC	1	2.21342	2.57109	67
lama	lamina ancestor	FBgn0016031	Phospholipase B-like. Cleavage of both acylester bonds of glycerophospholipids.	AMP	2.08298	41.5														PL2	2.35157	PC	1	2.2132	2.35157	68
Cyp6a23	Cytochrome P450 6a23	FBgn0033978	Hormone and insecticide metabolism.																	PL2	2.20571	PC	1	2.20571	2.20571	69
mib2	mind bomb 2	FBgn0086442	Myosing-binding E3 ubiquitin-protein ligase . Synaptic plasticity, memory formation and muscle integrity.																	PL2	2.17795	PC	1	2.17795	2.17795	70
CG15099	CG15099	FBgn0034400	Protein traffic between late Golgi and early endosomes.																	PL2	2.17684	PC	1	2.17684	2.17684	71
Nepl19	Neprilysin-like 19	FBgn0039612	M13 family metalloprotease-like, lacking conserved motifs important for catalytic activity. Probably inactive peptidase.	prolif	1.84208	34.1	PM12	1.60941	92.4											PL2	3.43179	PC	1	2.16687	3.43179	72
CG30187	CG30187	FBgn0050187	Serine protease and pseudoprotease domains. Exported.																	PL2	2.15255	PC	1	2.15255	2.15255	73
sPLA2	secretory Phospholipase A2	FBgn0033170	Arachidonic acid secretion.																	PL2	2.14138	PC	1	2.14138	2.14138	74
GstE6	Glutathione S transferase E6	FBgn0063494	Glutathione S transferase. Detoxification.				PM5	2.50755	77		PLASM1	1.58655	91.4	GST	1.98515	91	GST	1.98515	91	MZ	2.60619	PC	1	2.12998	2.60619	75
RhoGEF3	Rho guanine nucleotide exchange factor 3	FBgn0264707	Encapsulation response (Howell-2012). Mutant sensitive to Metarhizium (Lu-2015).	vir1	1.63972	22.6														PL2	2.67416	PC	1	2.09401	2.67416	76
SH3PX1	SH3PX1 ortholog (H. sapiens)	FBgn0040475	Autophagosome assembly; lamellipodium assembly; neurotransmitter secretion.														PM3	1.45551	72	PL2	2.09356	PC	1	2.09356	2.09356	77
CG31777	CG31777	FBgn0051777	Kunitz serine protease inhibitor.	robo2	2.28746	99.8	PM12	1.94855	100								PM4	2.70902	99.3	PL2	2.01227	PC	1	2.0777	2.28746	78
CG4250	CG4250	FBgn0034761	LPS-induced TNF-α factor (LITAF) homolog. Endosome. Multivesicular body (MVB) sorting.	Pcd	1.3217	37.3	PM7	1.68322	97.9		PLASM1	2.99165	99.5							PP	2.759	PC	1	2.07006	2.99165	79
GlcT	Ceramide glucosyltransferase	FBgn0067102	Glycosphingolipid synthesis. Regulates lipid energy metabolism.	vir1	1.86965	42											PM3	1.50071	71.8	PL2	2.23893	PC	1	2.04598	2.23893	80
NimB2	Nimrod B2	FBgn0028543	Exported Nimrod protein. Function unknown.	prolif	1.64948	27.3											PH2	1.97357	39.5	PL2	2.46202	PC	1	2.0152	2.46202	81
Snx1	Sorting nexin 1	FBgn0031534	Promotes formation of endosomal membrane tubules into which cargo proteins are sorted.																	PL2	2.00903	PC	1	2.00903	2.00903	82
CG10055	CG10055	FBgn0037482	Accumulation of H/ACA ribonucleoproteins.																	PL2	2.00663	PC	1	2.00663	2.00663	83
Piezo	Piezo	FBgn0264953	Stretch-activated activated cation channel - mechanical nociceptor.	Inos	1.65913	17.1														PL2	2.38934	PC	1	1.99103	2.38934	84
Nplp2	Neuropeptide-like precursor 2	FBgn0287423	Neuropeptide, unknown function. Induced by E. coli and M. luteus infection (Vierstraete 2006).	prolif	3.52287	90.9	PM12	1.47027	100	Ppn	PLASM1	1.47692	99.5				PM1	1.82275	99.2			PC	1	1.97038	3.52287	85
l(3)05822	lethal (3) 05822	FBgn0010877	Endophilin-A. Endocytosis.	robo2	1.44313	33.7														PL2	2.66889	PC	1	1.96254	2.66889	86
Atpα	Na pump α subunit	FBgn0002921	Integral membrane cation antiporter protein that utilizes ATP to shuttle Na+ and K+.				PM10	2.53928	72.8		PLASM1	1.51239	91.4									PC	1	1.95969	2.53928	87
Alh	Alhambra	FBgn0261238	zinc finger/leucine zipper nuclear protein. It is required in the nervous system for maintaining eve expression and normal growth. It is also involved in muscle development and male courtship behavior.				PM6	1.54058	50.6											PL2	2.46591	PC	1	1.94909	2.46591	88
Sarm	Sterile alpha and Armadillo motif	FBgn0262579	Intracellular signaling molecule in pro-degenerative pathway.				PM12	1.35822	53.4											PL2	2.76936	PC	1	1.93943	2.76936	89
CG18659	CG18659	FBgn0027561	Guanyl-nucleotide exchange factor. Endocytic recycling; endocytosis	vir1	1.50943	31.2														PL2	2.38887	PC	1	1.8989	2.38887	90
luna	luna	FBgn0040765	Transcription factor. Separation of the sister chromatids in early embryo.				PM10	1.53149	72					Adi	1.99053	79.2	Adi	1.99053	79.2	PL2	2.2371	PC	1	1.89637	2.2371	91
Idgf2	Imaginal disc growth factor 2	FBgn0020415	Imaginal disc growth factor 2, chitinase homolog, NOT chitinase activity.				PM7	1.73322	92.9		PLASM1	2.06064	96									PC	1	1.88985	2.06064	92
CG3558	CG3558	FBgn0025681	FTS and Hook-interacting protein-related. Vesicle trafficking?	vir1	1.28493	36.9											PM3	1.37712	67.4	PL2	2.73876	PC	1	1.87593	2.73876	93
CG8046	CG8046	FBgn0033388	Peptidoglycan transmembrane transporter (Paik-2017). Mutant resistant to Metarhizium (Lu-2015).	Rel	2.18254	41					AMP	1.43109	52.8				PM4	1.60924	62.8	PL2	2.07987	PC	1	1.8659	2.18254	94
pst	pastrel	FBgn0035770	Long-term memory. Protein secretion. Affercts susceptibility to the Drosophila C virus (DCV).	vir1	1.90312	25.6	PM7	1.68431	58.2		AMP	1.73062	67.6							PL2	2.07234	PC	1	1.84135	2.07234	95
kek1	kekkon-1	FBgn0015399	Transmembrane protein, acting in a negative feedback loop to modulate Egfr activity.	vir1	2.19256	80.7	PM5	1.57771	32		MET	1.39762	41.6	GST	1.6571	61.4	GST	1.6571	61.4	PL2	2.61185	PC	1	1.8371	2.61185	96
CG2765	CG2765	FBgn0035087		robo2	1.31344	44.6											PM4	1.5347	69.5	PL2	2.55057	PC	1	1.8303	2.55057	97
Idgf3	Imaginal disc growth factor 3	FBgn0020414	Hemolymph clot component. Wound healing.	PL3	1.77105	60.9					AMP	1.56943	83.5	PM	1.70016	85.5	PM1	1.62449	86.9	IZ	2.36891	PC	1	1.82916	2.36891	98
vsg	visgun	FBgn0045823	Related to sialomucin core protein 24, a cell adhesion molecule that regulates the proliferation, adhesion and migration of hematopoietic progenitors. Interacts with the C-X-C chemokine receptor type 4.				PM9	1.5984	97.1		PLASM1	2.21684	98.6	Adi	1.6976	94.9	PM3	2.41112	99.3			PC	1	1.81866	2.21684	99
CG10413	CG10413	FBgn0032689	Cation-coupled chloride transporter.	PL1	1.29597	64.6											PM4	1.70237	81	PL2	2.54058	PC	1	1.81453	2.54058	100
Best1	Bestrophin 1	FBgn0040238	Bestrophin 1, forms oligomeric chloride channels (CG6264 gene symbol:Best1 FBgn0040238 )	vir1	1.30782	15.8														PL2	2.51236	PC	1	1.81266	2.51236	101
rost	rolling stone	FBgn0011705	Myoblast fusion.	vir1	1.37133	32.4														PL2	2.35372	PC	1	1.79659	2.35372	102
CG30344	CG30344	FBgn0050344		robo2	1.30801	84	PM12	1.45063	69.5											PL2	2.93637	PC	1	1.7728	2.93637	103
Mvl	Malvolio	FBgn0011672	Metal (copper?) transporter. Gut and hemocytes. Feeding decisions.	robo2	1.90136	91					AMP	1.48827	71.2	Adi	1.56142	70.2	PM4	1.97639	92.6	PL2	2.15127	PC	1	1.75586	2.15127	105
Ugt37D1	UDP-glycosyltransferase family 37 member D1	FBgn0040260	Detoxification of substrates, cuticle formation, pigmentation and olfaction.				PM5	1.38045	21.5											PL2	2.23142	PC	1	1.7551	2.23142	106
Fer2LCH	Ferritin 2 light chain homologue	FBgn0015221					PM5	1.78764	89.4		PLASM1	1.85837	97.1	Adi	1.62411	93.3	PM4	1.64004	96.6			PC	1	1.75392	1.85837	107
CG9331	CG9331	FBgn0032889		PL3	1.80953	37.7					PLASM1	1.66805	91.3									PC	1	1.73735	1.80953	108
Nepl20	Neprilysin-like 20	FBgn0039613	Metalloendopeptidase-like protein, lacking one or more of the conserved motifs important for catalytic activity.	prolif	1.3477	13.6	PM12	1.68599	86.3											PL2	2.24879	PC	1	1.72239	2.24879	109
Fer1HCH	Ferritin 1 heavy chain homologue	FBgn0015222					PM5	1.60621	77.9		PLASM1	1.73135	96.7	Adi	1.73065	90.4	Adi	1.73065	90.4			PC	1	1.68836	1.73135	110
SPH93	Serine protease homolog 93	FBgn0032638	Serine pseudoprotease, exported.								PLASM1	1.6719	87.8									PC	1	1.6719	1.6719	111
ush	u-shaped	FBgn0003963	Binds GATA factors (like srp or pnr). Affects TGFbeta, Hedgehog, JAK/STAT and Insulin/PI3K pathways. Embryonic development, heart, blood and neural development and body size.	robo2	1.40261	35.4	PM10	1.3867	37.9											PL2	2.40133	PC	1	1.67157	2.40133	112
cathD	cathD	FBgn0029093	Cathepsin D. Apoptosis. Mutant very sensitive to Vibrio infection (Berkey 2009).	PL0	1.30277	99.9	PM12	1.65496	98.5		PLASM1	1.72056	94.1	Adi	2.06505	95.5	PH6	2.079	97.1			PC	1	1.66366	2.06505	113
drpr	draper	FBgn0027594	Phagocytosis receptor, autophagy.	robo2	1.30932	62.4	PM12	1.44879	80.2		AMP	1.66116	75.6	Adi	1.59649	63.5	PM4	1.88801	83.6	PL2	2.44884	PC	1	1.65241	2.44884	114
GlcAT-P	Glucuronyltransferase P	FBgn0036144	Biosynthesis of L2/HNK-1 carbohydrate epitope on both glycolipids and glycoproteins.	PL0	1.29294	80.4					PLASM1	1.46625	85.4	Adi	1.60576	71.9	PM4	2.1455	94.3	X	2.07296	PC	1	1.58495	2.07296	115
CG31337	CG31337	FBgn0051337	CG5909/Grass-like, lone Clip domain (no protease domain).	PL3	1.49755	99.4					PLASM1	1.37505	76.4	Adi	1.84206	95.5	Adi	1.84206	95.5			PC	1	1.55956	1.84206	116
CG30015	CG30015	FBgn0050015	Uncharacterized.	robo2	1.68818	48.1	PM12	1.37152	42		PLASM1	1.42182	87.4									PC	1	1.48761	1.68818	117
Prosap	Prosap	FBgn0040752	Synaptic scaffolding proteins. Regulates synaptic growth and development, neuromuscular junction and synapses of the calyx, and olfactory acuity.	Inos	1.47453	63.2	PM12	1.40228	93.1		PLASM1	1.58088	91.3									PC	1	1.4841	1.58088	118
Vamp7	Vesicle-associated membrane protein 7	FBgn0266186	R type SNARE protein. Mediates the fusion of autophagosomes with endosomes and lysosomes by forming a SNARE complex with Syx17 (Qa) and Snap29 (Qbc). Localizes to endosomes in a Rab21 and Sbf dependent manner.				PM12	1.3869	81.7		PLASM1	1.47389	90.9				PM4	1.9767	94.7			PC	1	1.42974	1.47389	119
CG15098	CG15098	FBgn0034398	Uncharacterized insect protein.	vir1	1.28982	40.8	PM5	1.36569	92.9		PLASM1	1.61204	91.5				PM2	1.4154	99.6			PC	1	1.41608	1.61204	120
Spn27A	Serpin 27A	FBgn0028990	Hemolymph serpin. Negatively regulates melanization.	PL3	1.29448	53.6					PLASM1	1.37941	76.3	Adi	1.50774	86.5	Adi	1.50774	86.5			PC	1	1.39114	1.50774	121
Orct	Organic cation transporter	FBgn0019952									PLASM1	1.38959	77.6									PC	1	1.38959	1.38959	122
26-29-p	26-29kD-proteinase	FBgn0250848	Cysteine endopeptidase, cathepsin.	PL0	1.38895	49.3					PLASM1	1.36811	87.8									PC	1	1.37849	1.38895	123
babos	babos	FBgn0034724	Cell adhesion protein. Dendrite morphogenesis.								PLASM1	1.36489	90.7									PC	1	1.36489	1.36489	124
gas	gasoline	FBgn0034736	Carboxylesterase.								PLASM1	1.35109	72.8				PH2	1.38606	32.1			PC	1	1.35109	1.35109	125

## Sheet: Antimicrobial
Antimicrobial response clusters				scRNAseq: fold enrichment ("FC") and % representation
Characteristic genes				Cattenoz			Tattikota			Fu	Leitão			Cho			Girard		Summary	Mean
Symbol	Name	FlyBase ID	Description	Clust	FC	%	Clust	FC	%	Clust	Clust	FC	%	Clust	FC	%	Clust	Fold	Class	n	FC
Mtk	Metchnikowin	FBgn0014865	Metchnikowin				PM7	15.8795	51.3		AMP	22.3559	83.1						AMP	2	18.8415
Drs	Drosomycin	FBgn0283461	Drosomycin antifungal.	vir1			PM7	8.78022	47	Ppn	AMP	10.8618	91.3	PM3					AMP	2	9.76569
Dro	Drosocin	FBgn0010388	Drosocin				PM7	4.93973	33.7		AMP	9.02293	80.7	PH5					AMP	2	6.67614
CecC	Cecropin C	FBgn0000279	Cecropin	AMP	6.09035	70.7	PM7	8.2791	77.7		AMP	10.1324	95	PH4			MZ	3.75485	AMP	4	6.61808
CecA1	Cecropin A1	FBgn0000276	Cecropin	AMP	7.74054	61	PM7	5.25565	45.6		AMP	24.5651	88.4	PH4	1.9748	75.8	MZ	3.84015	AMP	5	5.96922
CecA2	Cecropin A2	FBgn0000277	Cecropin	AMP	9.96744	68.3	PM6				AMP	8.22268	84.8	PH4	2.64984	85	MZ	5.32314	AMP	4	5.83104
Mtkl	Mtk-like	FBgn0262881	Metchnikowin-like? (Tattikota-20)	AMP			PM7	4.05804	86.5		AMP	8.34588	75.3	CC1			IZ		AMP	2	5.81962
AttD	Attacin-D	FBgn0038530	Attacin	AMP	2.65311	31.7	PM7	7.11565	31.1					PM4					AMP	2	4.34495
PGRP-LB	Peptidoglycan recognition protein LB	FBgn0037906	Amidase activity, scavenges (DAP-type??) peptidoglycan.	AMP	3.70352	36.6	PM7	3.83827	46.8		AMP	4.77283	84	PH5			PSC		AMP	3	4.07858
CG42807	CG42807	FBgn0261989	Uncharacterized Drosophila-specific protein. Induced, IKKβ- and Rel-dependently, by C virus (DCV, Goto 2018). Suppressed by Diedel (Lamiable 2016).	AMP	3.80667	100	PM3				AMP	2.19239	31.1	PM4			IZ		AMP	2	2.88889
PGRP-SC2	Peptidoglycan recognition protein SC2	FBgn0043575	Active amidase. Midgut-specicfic peptidoglycan recognition protein.	AMP	5.23713	56.1	PM7	1.46971	12.4					PH6					AMP	2	2.77436
CG42259	CG42259	FBgn0266569	Short peptide. Trypsin inhibitor-like cysteine-rich domain (also present in hml).				PM7	2.35669	29		AMP	3.06654	95.6						AMP	2	2.68829
AttB	Attacin-B	FBgn0041581	Attacin	AMP	2.51118	17.1	PM7	3.32725	31.1					PH6	2.08853	71.3			AMP	3	2.59379
Tep2	Thioester-containing protein 2	FBgn0041182	Mediates inflammatory response and lowering of carbohydrates and triglycerides in bacteria-infected flies (Shokal 2018)	AMP	3.35384	68.3	LM2			Tha	AMP	1.91155	79.8	LM2					AMP	2	2.532
GstD3	Glutathione S transferase D3	FBgn0010039	Glutathione S-transferase, Possibly inactive homolog or pseudogene.	ImpL2			PM5				AMP	1.62744	92.3	GST			MZ	3.80121	AMP	2	2.48722
CG43175	CG43175	FBgn0262794	Uncharacterized Cys-rich small protein. Similar to inhibitory C terminals of serine proteases (easter).	AMP	2.1546	22	LM1				AMP	2.70463	97	PM4					AMP	2	2.414
CG45045	CG45045	FBgn0266405	IBIN-like Toll-inducible exported peptide.				PM7	3.414	32.8		AMP	1.64988	50.7	PH6					AMP	2	2.37333
AttA	Attacin-A	FBgn0012042	Attacin	AMP	2.3522	22	PM7	2.34173	25.4					PH6	2.33198	69.3			AMP	3	2.34196
pirk	poor Imd response upon knock-in	FBgn0034647	Negative regulator of the Immune Deficiency (Imd) pathway.	AMP	2.05821	31.7	PM11				AMP	1.51419	48.1				PSC		AMP	2	1.76537
CG8177	CG8177	FBgn0036043	Bicarbonate transmembrane transporter.	AMP	1.77341	26.8	PM6				AMP	1.39631	87.2	PSC					AMP	2	1.5736
Gp150	Gp150	FBgn0013272	Transmembrane glycoprotein that regulates Notch signaling. Substrate for receptor tyrosine phosphatase Ptp10D.	AMP	1.45757	14.6	LM2				AMP	1.36492	58.1	PH2					AMP	2	1.41048
DptB	Diptericin B	FBgn0034407	Diptericin				PM7	10.0897	24										amp	1	10.0897
Obp99a	Odorant-binding protein 99a	FBgn0039678	Odorant-binding protein. Transport of odorants.	AMP	9.55927	56.1													amp	1	9.55927
CecB	Cecropin B	FBgn0000278	Cecropin				PM7				AMP	4.9546	80.5	PH5			MZ		amp	1	4.9546
Mdr49	Multi drug resistance 49	FBgn0004512	ABCB subfamily drug transmembrane transporter.	AMP	3.92425	51.2													amp	1	3.92425
Tep1	Thioester-containing protein 1	FBgn0041183	Defence against entomopathogenic fungi, Gram-positive bacteria and parasitoid wasps.	Pcd			PM7				AMP	3.07182	89.5	PM1			IZ		amp	1	3.07182
Zip99C	Zinc/iron regulated transporter-related protein 99C	FBgn0039714	Iron transporter in Golgi and ER. Moves iron from cytoplasm into secretory compartments. Zinc transport and homeostasis.	AMP	3.02087	68.3					AMP			PM4			CC		amp	1	3.02087
CG31313	CG31313	FBgn0051313	Cystatin. Proteinase inhibitor								AMP	2.72979	87.7						amp	1	2.72979
CG9691	CG9691	FBgn0030160	Uncharacterized exported peptide, one paralog, unique to Drosophila.								AMP	2.46757	85.1	PH1					amp	1	2.46757
Rel	Relish	FBgn0014018	NFκB-like transcription factor. Imd pathway.	Rel			PM6				AMP	2.43126	81.4						amp	1	2.43126
PGRP-SA	Peptidoglycan recognition protein SA	FBgn0030310	Peptidoglycan recognition protein SA	Rel			PM3				AMP	2.38837	69.3	PM2			PL2		amp	1	2.38837
CG30088	CG30088	FBgn0050088	Serine protease. Exported.	AMP	2.36883	51.2													amp	1	2.36883
CG7778	CG7778	FBgn0032025	Ly6 superfamily. Atilla (distant) homolog.	AMP	2.27175	14.6	LM2							PM4					amp	1	2.27175
Arc2	Arc2	FBgn0033928	Self-assembles into virion-like capsids that encapsulate RNAs and mediate intercellular RNA transfer.	AMP	2.22027	39	PM5							GST					amp	1	2.22027
Usf	Usf	FBgn0029711	bHLH family transcription factor. Recognizes E-boxes in the Ste promoter. Biologcal function unknown.	Rel							AMP	2.15956	60.5	PM4					amp	1	2.15956
Hayan	Hayan	FBgn0030925	Serine protease. Clip-like domain. Similar to SP7 (MP2), and to ea, MP1, SPE…	AMP	2.11689	26.8													amp	1	2.11689
CG8180	CG8180	FBgn0034021	Uncharacterized. Mutant resistant to Metarhizium (Lu-2015). Induced by E. coli in S2 cells (Valanne 2007).	AMP	2.08663	29.3													amp	1	2.08663
lama	lamina ancestor	FBgn0016031	Phospholipase B-like. Cleavage of both acylester bonds of glycerophospholipids.	AMP	2.08298	41.5											PL2		amp	1	2.08298
PGRP-SD	Peptidoglycan recognition protein SD	FBgn0035806	Extracellular recognition molecule.				PM7	2.07312	17.8					PM4					amp	1	2.07312
RabX1	RabX1	FBgn0015372	Small GTPase. Vesicle trafficking regulation. Basement membrane organization.	Rel							AMP	2.00278	64.3	PM4			IZ		amp	1	2.00278
CG32368	CG32368	FBgn0052368	Uncharacterized Drosophila-specific protein. D. melanogaster group.								AMP	2.00171	70.5	PM4					amp	1	2.00171
CG14322	CG14322	FBgn0038532	Protein polyubiquitination.	AMP	1.97275	24.4	PM3							PH5					amp	1	1.97275
CtsB1	Cathepsin B1	FBgn0030521	Lysosome.	AMP	1.93086	97.6	PM12				MET			PH6			PSC		amp	1	1.93086
Ask1	Apoptotic signal-regulating kinase 1	FBgn0014006	MAPK kinase kinase. Response to various stresses,phosphorylating MAPK kinases in JNK and p38 MAPK pathways, inducing cellular stress responses including cell death and immune responses.	AMP	1.92631	36.6													amp	1	1.92631
mam	mastermind	FBgn0002643	Transcriptional coactivator. Notch signaling pathway.	AMP	1.92126	61	PM10												amp	1	1.92126
Su(dx)	Suppressor of deltex	FBgn0003557	Ubiquitin protein ligase; ubiquitin-protein transferase. Negative regulation of Notch signaling pathway.	vir1			PM6				AMP	1.85026	73.7						amp	1	1.85026
Cys	Cystatin-like	FBgn0004629	Cysteine-type endopeptidase inhibitor.	vir1			PM12				AMP	1.74514	72.1	PM1					amp	1	1.74514
CG11686	CG11686	FBgn0040551	Uncharacterized insect protein.				LM2				AMP	1.73859	76.4	LM2			PSC		amp	1	1.73859
Idgf2	Imaginal disc growth factor 2	FBgn0020415	Imaginal disc growth factor 2, chitinase homolog, NOT chitinase activity.				PM7	1.73322	92.9		PLASM1								amp	1	1.73322
pst	pastrel	FBgn0035770	Long-term memory. Protein secretion. Affercts susceptibility to the Drosophila C virus (DCV).	vir1			PM7				AMP	1.73062	67.6				PL2		amp	1	1.73062
insc	inscuteable	FBgn0011674	Adaptor protein required for asymmetric cell division. Vibrio cholerae infection (Berkey-2009).	AMP	1.70526	29.3													amp	1	1.70526
spir	spire	FBgn0003475	Actin nucleation factor, polymerizes linear actin filaments, bundles and/or crosslinks actin and microtubules. Downstream effector of Rho1.	Rel			PM5				AMP	1.66676	60.9	PM2			IZ		amp	1	1.66676
drpr	draper	FBgn0027594	Phagocytosis receptor, autophagy.	robo2			PM12				AMP	1.66116	75.6	PM4			PL2		amp	1	1.66116
CG30456	CG30456	FBgn0050456	RhoGEF; Guanine Nucleotide Exchange Factor (GEF) for Rho family GTPases. Positive regulation of Rho protein signal transduction.								AMP	1.64587	43.4	Adi					amp	1	1.64587
LRP1	LDL receptor protein 1	FBgn0053087	Transport of lipoprotein LTP across the blood brain barrier.	AMP	1.6071	22											CC		amp	1	1.6071
CG9743	CG9743	FBgn0039756	Oxidoreductase. Unsaturated fatty acid biosynthesis.	AMP	1.60454	19.5													amp	1	1.60454
ome	omega	FBgn0259175	Dipeptidyl-peptidase.				PM7				AMP	1.60031	46.6				IZ		amp	1	1.60031
Irc	Immune-regulated catalase	FBgn0038465	Haem peroxidase, catalase. Antioxidant defence response.								AMP	1.59455	74.6				IZ		amp	1	1.59455
shg	shotgun	FBgn0003391	E-cadherin (E-cad). Cell aggregation. Mutant sensitive to Beauveria infection (Jin 2008).	AMP	1.58297	19.5								PH1					amp	1	1.58297
VhaM9.7-b	Vacuolar H[+] ATPase M9.7 subunit b	FBgn0028663					LM2				AMP	1.57845	92.9						amp	1	1.57845
CG14050	CG14050	FBgn0040392	Zinc finger C2H2 transcription factor.	AMP	1.57477	22													amp	1	1.57477
Idgf3	Imaginal disc growth factor 3	FBgn0020414	Imaginal disc growth factor 3, NOT chitinase (CG4559 gene symbol:Idgf3 FBgn0020414 (GO:0008084 imaginal disc growth factor) (GO:0005576 extracellular) (GO:0004568 chitinase))	PL3							AMP	1.56943	83.5	PM1			IZ		amp	1	1.56943
GstE9	Glutathione S transferase E9	FBgn0063491	Glutathione S transferase. Detoxification.	AMP	1.55975	19.5	PM5										MZ		amp	1	1.55975
CG8066	CG8066	FBgn0038243	Cystatin. Cysteine endopeptidase inhibitor.	vir1			LM2				AMP	1.55861	75.7				PL2		amp	1	1.55861
CG43109	CG43109	FBgn0262569	Uncharacterized exported Drosophila (Sophophora) peptide. DptA/DptB cluster.				PM7	1.55709	7.8										amp	1	1.55709
Scamp	Scamp	FBgn0040285	Neuromuscular synaptic transmission, synaptic vesicle exocytosis.	robo2			LM2				AMP	1.52866	93.8	LM2					amp	1	1.52866
Ubi-p5E	Ubiquitin-5E	FBgn0086558	Protein ubiquitination, ubiquitin-dependent protein catabolism.	AMP							AMP	1.52481	86.2	PSC			PSC		amp	1	1.52481
CG10433	CG10433	FBgn0034638	Unknown function. Seminal fluid defense peptide???? (not specifically expressed there)				PM6				AMP	1.50791	83.4				PP		amp	1	1.50791
Pdxk	Pyridoxal kinase	FBgn0085484	Generates Pyridoxal-5-phosphate (vitamin B6). Chromosome integrity and glucose homeostasis.				PM10				AMP	1.48956	67.1						amp	1	1.48956
Mvl	Malvolio	FBgn0011672		robo2							AMP	1.48827	71.2	PM4			PL2		amp	1	1.48827
Idgf6	Imaginal disc growth factor 6	FBgn0013763	Growth factor. May act by stabilizing the binding of insulin-like peptides to its receptor.	Inos							AMP	1.47199	94.5						amp	1	1.47199
Fas3	Fasciclin 3	FBgn0000636	Cell adhesion molecule expressed by subsets of motoneurons and muscle cells.				LM2				AMP	1.46008	72.7	PH1					amp	1	1.46008
GstE1	Glutathione S transferase E1	FBgn0034335	Glutathione S transferase. Detoxification.				PM5				AMP	1.44757	68.1	GST			CC		amp	1	1.44757
CG13907	CG13907	FBgn0035173	Monocarboxylic acid transmembrane transport.								AMP	1.44399	68.4						amp	1	1.44399
Hydr2	α/β hydrolase2	FBgn0014906	Acylglycerol lipase. Hydrolyzes glycerol monoesters of long-chain fatty acids.								AMP	1.43886	76.3						amp	1	1.43886
AcCoAS	Acetyl Coenzyme A synthase	FBgn0012034	Activates acetate so that it can be used for lipid synthesis or for energy generation.	CC							AMP	1.43344	79.5						amp	1	1.43344
CG8046	CG8046	FBgn0033388	Peptidoglycan transmembrane transporter (Paik-2017). SLC46 folate transporter-like family. Mutant resistant to Metarhizium (Lu-2015).	Rel							AMP	1.43109	52.8	PM4			PL2		amp	1	1.43109
CG15210	CG15210	FBgn0040850	Low-complexity peptide (ST-rich).				LM2				AMP	1.4273	79.9						amp	1	1.4273
RpS9	Ribosomal protein S9	FBgn0010408	Ribosomal protein.	AMP	1.4199	100													amp	1	1.4199
CG7142	CG7142	FBgn0038595	Serine protease.	CC							AMP	1.41097	80.8						amp	1	1.41097
VhaAC39-1	Vacuolar H[+] ATPase AC39 subunit 1	FBgn0285910									AMP	1.41025	85.1	PM4					amp	1	1.41025
LRR	Leucine-rich repeat	FBgn0033212	Negative modulator of NF-κB activation in honeybees — questionable: not obvious homologs.	vir1			LM2				AMP	1.40299	56	PM3			PL2		amp	1	1.40299
Cyp28a5	Cyp28a5	FBgn0028940	Cytochrome P450.								AMP	1.38523	59.6						amp	1	1.38523
Nha2	Na[+]/H[+] hydrogen antiporter 2	FBgn0263390	Transmembrane transport of potassium. Maintains cellular pH.				PM7	1.3841	10.9										amp	1	1.3841
IP3K1	Inositol 1,4,5-triphosphate kinase 1	FBgn0032147	Inositol phosphate kinase. Response to oxidative stress.	Rel			PM3				AMP	1.38355	49.6	LM1			IZ		amp	1	1.38355
CG10026	CG10026	FBgn0032785	Human alpha-tocopherol transfer protein-like. CRAL-TRIO hydrophobic ligand-binding domain	PL3							AMP	1.36892	42.9						amp	1	1.36892
Eno	Enolase	FBgn0000579	Glycolysis.				PM10				AMP	1.36482	92.8				PSC		amp	1	1.36482
CG10527	CG10527	FBgn0034583	Farnesoic acid O-methyl transferase. Juvenile hormone metabolism??	PL0							AMP	1.36349	71.2				PSC		amp	1	1.36349
CG12576	CG12576	FBgn0031190	Uncharacterized.								AMP	1.35819	72.2						amp	1	1.35819
Stacl	Stac-like	FBgn0263980	Regulates voltage-gated calcium channel. Regulation of cell growth.				PM7	1.35783	9.3										amp	1	1.35783
CG3165	CG3165	FBgn0031484									AMP	1.35255	52.6				X		amp	1	1.35255

## Sheet: Stress
Oxidative stress clusters				scRNAseq: fold enrichment ("FC") and % representation
Characteristic genes				Cattenoz			Tattikota			Fu	Leitão			Cho			Girard		Summary	Mean
Symbol	Name	FlyBase ID	Description	Clust	FC	%	Clust	FC	%	Clust	Clust	FC	%	Clust	FC	%	Clust	Fold	Class	n	FC
CG15784	CG15784	FBgn0029766	Uncharacterized Zn finger CCHC domain-containing protein 10, Digestive tract.				PM5	10.252	81.1					GST	6.34614	95.7	PSC		GST	2	8.06603
lncRNA:CR44430	long non-coding RNA:CR44430	FBgn0265612	Uncharacterized long non-coding RNA.				PM5	3.632	43.2					GST	2.97485	74.7			GST	2	3.28704
CG18547	CG18547	FBgn0037973	Potassium voltage-gated channel A, regulatory beta subunit 1. Midgut.				PM5	2.62842	41.6					GST	2.52311	78.1			GST	2	2.57522
GstE6	Glutathione S transferase E6	FBgn0063494	Glutathione S transferase. Detoxification.				PM5	2.50755	77		PLASM1			GST	1.98515	91	MZ		GST	2	2.23112
CG10638	CG10638	FBgn0036290	Aldo-keto reductase.				PM5	2.11331	65.4					GST	2.23592	87.1	X		GST	2	2.17375
Tsp42Ed	Tetraspanin 42Ed	FBgn0029507	Tetraspanin.	LM1			PM5	2.13774	47.9		PLASM1			GST	2.0944	47.2			GST	2	2.11596
IscU	Iron-sulfur cluster assembly enzyme	FBgn0037637	Oxidative stress response. Mitochondrial iron-sulfur cluster (ISC) pathway.				PM5	1.95431	66.1					GST	1.77323	87.1	PSC		GST	2	1.86157
CG12171	CG12171	FBgn0037354	17-beta-estradiol 17-dehydrogenase. Steroid hormone dehydrogenase.				PM5	1.95987	49.8					GST	1.58431	56.7	X		GST	2	1.76211
MRP	Multidrugsistance like Protein 1	FBgn0032456	ABC transporter-like. ATP-dependent anion transmembrane transport.				PM5	1.974	58.6					GST	1.54118	62.7			GST	2	1.74421
CG2909	CG2909	FBgn0030189	Uncharacterized insect protein.				PM5	1.75355	24.5					GST	1.54503	33.9	CC		GST	2	1.64599
CG17327	CG17327	FBgn0038107	Aminoacyl-tRNA hydrolase. Hydrolysis of N-substituted aminoacyl-tRNA.				PM5	1.67948	32.8					GST	1.41006	62.7			GST	2	1.53889
Archease	Archease	FBgn0038893	Component of tRNA-splicing ligase complex. Facilitating enzymatic turnover of catalytic subunit RtcB.				PM5	1.64577	36					GST	1.35396	45.1	X		GST	2	1.49275
Nfs1	Nfs1 cysteine desulfurase	FBgn0032393	Supplies inorganic sulfur from cysteine to iron-sulfur (Fe-S) clusters.				PM5	1.50772	32.7					GST	1.42507	52.8	X		GST	2	1.46581
CG2076	CG2076	FBgn0030263	Orthologous to human GHITM (growth hormone inducible transmembrane protein). Bax inhibitor 1-related				PM5	1.46417	40.9					GST	1.35016	60.9			GST	2	1.40601
Prp31	Pre-mRNA processing factor 31	FBgn0036487	Splicing factor associated with U4/U6.U5 tri-snRNP.				PM5	1.37467	21.3					GST	1.35731	42.5			GST	2	1.36596
Arc1	Activity-regulated cytoskeleton associated protein 1	FBgn0033926	RNA-transporting extracellular vesicles. Mediates starvation response (Mattaliano 2007).	Rel			PM5	3.77071	83.1					GST			PSC		gst	1	3.77071
CG3348	CG3348	FBgn0040609	Uncharacterized Chitin-binding peptide. Several Drosophila and Anopheles paralogs. Related to peritrophin 15b.				PM5	3.11254	39.1					GST			MZ		gst	1	3.11254
BI-1	Bax Inhibitor-1	FBgn0035871	Suppressor of apoptosis and autophagy during starvation, modulates unfolded protein response.				PM5	2.41766	61.8								CC		gst	1	2.41766
GstD3	Glutathione S transferase D3	FBgn0010039	Glutathione S-transferase, Possibly inactive homolog or pseudogene.	ImpL2			PM5	2.39189	72.3		AMP			GST			MZ		gst	1	2.39189
GstE1	Glutathione S transferase E1	FBgn0034335	Glutathione S transferase. Detoxification.				PM5	2.37588	53.9		AMP			GST			CC		gst	1	2.37588
Arc2	Arc2	FBgn0033928	Self-assembles into virion-like capsids that encapsulate RNAs and mediate intercellular RNA transfer.	AMP			PM5	2.24349	43.5					GST					gst	1	2.24349
ref(2)P	refractory to sigma P	FBgn0003231	Binds polyubiquitinated proteins. Marker of neuronal aging and aggregate formation. Controls sigma virus multiplication.				PM5	2.21689	40.4										gst	1	2.21689
Ssrp	Structure specific recognition protein	FBgn0010278	Transcription factor. Component of protein complex, FACT, facilating GAGA factor-directed chromatin remodeling.				PM5	2.06446	56.1					GST			X		gst	1	2.06446
CG13887	CG13887	FBgn0035165	Endoplasmic reticulum to Golgi vesicle-mediated transport.				PM5	2.05215	70.3										gst	1	2.05215
dys			Unclear which gene is referred to here (not Dys, which is reported elsewhere)											GST	2.04587	52.8			gst	1	2.04587
lncRNA:CR44138	long non-coding RNA:CR44138	FBgn0264987	Long non-coding RNA. 3' antisense of CG9813.				PM5	1.98917	12.2										gst	1	1.98917
CG3008	CG3008	FBgn0031643	Atypical kinase. Maturation of SSU-rRNA.				PM5	1.94776	34.6					GST					gst	1	1.94776
GstD5	Glutathione S transferase D5	FBgn0010041	Glutathione S transferase. Detoxification.				PM5	1.82166	12.6										gst	1	1.82166
spir	spire	FBgn0003475	Actin nucleation factor, polymerizes linear actin filaments, bundles and/or crosslinks actin and microtubules. Downstream effector of Rho1.	Rel			PM5	1.79678	30.5		AMP			PM2			IZ		gst	1	1.79678
CG14907	CG14907	FBgn0038455	Protein disulfide isomerase homolog? Unique to Drosophila.				PM5	1.79557	36.8					GST					gst	1	1.79557
eIF6	eukaryotic translation initiation factor 6	FBgn0034915	Eukaryotic initiation factor 6. Regulates Wnt signaling and beta-catenin protein synthesis.				PM5							GST	1.79243	71.7			gst	1	1.79243
lectin-24A	lectin-24A	FBgn0040104	C-type lectin. Rapidly evolving gene, induced by infection by parasitic wasps (Keebaugh 2012).				PM5	1.73681	25.7										gst	1	1.73681
Dgp-1	Dgp-1	FBgn0027836	Translational GTPase. Facilitates and controls protein synthesis. Mutant sensitive to Metarhizium (Lu-2015).				PM5	1.71295	14.9										gst	1	1.71295
CG3397	CG3397	FBgn0037975	Aldo/keto reductase. Upregulated by oxidative stress (paraquat).											GST	1.67823	36.9			gst	1	1.67823
puml	pummelig	FBgn0033226	Phospholipase. Controls energy storage (lipid metabolism).				PM5	1.65018	28.1										gst	1	1.65018
AOX1	Aldehyde oxidase 1	FBgn0267408	Pyridoxal oxidase, perhaps Xanthine dehydrogenase.				PM5							GST	1.6098	49.8			gst	1	1.6098
GstD2	Glutathione S transferase D2	FBgn0010038	Glutathione S transferase.				PM5	1.60108	7.3										gst	1	1.60108
mbf1	multiprotein bridging factor 1	FBgn0262732	Transcriptional co-activator. Bridge between transcription factors and TATA-binding protein. Translocates to nucleus under stress, to co-activate stress-reponse genes.				PM5	1.5897	62.8					GST			CC		gst	1	1.5897
Dh31	Diuretic hormone 31	FBgn0032048	Neuropeptide, diuretic hormone class 2 family. Regulates midgut peristalsis, malpighian tubules, circadian rhythm,											GST	1.58565	35.6			gst	1	1.58565
CG3448	CG3448	FBgn0035996	DNA repair protein XRCC4. DNA ligase IV complex and DNA-dependent protein kinase-DNA ligase 4 complex.				PM5							GST	1.57278	40.8			gst	1	1.57278
GstD9	Glutathione S transferase D9	FBgn0038020	Glutathione S transferase. Detoxification.				PM5	1.55947	27.8										gst	1	1.55947
RtcB	RtcB RNA ligase	FBgn0032781	tRNA-splicing ligase complex.				PM5	1.55217	36.7								X		gst	1	1.55217
CaBP1	calcium-binding protein 1	FBgn0025678	Phagocytosis of apoptotic cells.	Pcd			PM5	1.54391	74.7										gst	1	1.54391
JhI-26	Juvenile hormone-inducible protein 26	FBgn0028424	Ecdysteroid kinase-like.				CC2							GST	1.52321	37.8			gst	1	1.52321
RpA-70	Replication Protein A 70	FBgn0010173	Single-stranded DNA binding. DNA-dependent DNA replication.	prolif			PM5							GST	1.48204	53.6	X		gst	1	1.48204
ver	verrocchio	FBgn0262524	Terminin complex. Prevents telomere fusions.											GST	1.47117	42.5			gst	1	1.47117
CG42365	CG42365	FBgn0259711	Uncharacterized, many paralogs.				PM5	1.45488	19.3										gst	1	1.45488
Irbp18	Inverted repeat binding protein 18 kDa	FBgn0036126	P-element binding.Double-strand break repair.											GST	1.4285	40.3			gst	1	1.4285
rad50	rad50	FBgn0034728	DNA repair. Double-strand break repair and telomere maintenance.				PM5							GST	1.41849	39.5			gst	1	1.41849
RPA3	Replication protein A3	FBgn0266421	Maintenance of the neuronal stem cell population.	prolif			PM5	1.41816	40.2								X		gst	1	1.41816
NTPase	NTPase	FBgn0024947	NDP phosphatase				PM5	1.4047	31.7										gst	1	1.4047
ymp	yellow-emperor	FBgn0261287	mRNA splicing.											GST	1.39701	29.6			gst	1	1.39701
PolZ2	DNA polymerase zeta subunit 2	FBgn0037345	Translesion DNA synthesis. Various DNA repair mechanisms											GST	1.39244	36.1	X		gst	1	1.39244
Nxt1	NTF2-related export protein 1	FBgn0028411	Nuclear RNA export.				PM5							GST	1.38763	58.8			gst	1	1.38763
CG1703	CG1703	FBgn0030321	ATP-binding cassette				PM5							GST	1.36911	73.8			gst	1	1.36911
Nt5b	5' nucleotidase B	FBgn0052549	Adenosine metabolism.				PM5	1.35723	31.6										gst	1	1.35723
agt	O-6-alkylguanine-DNA alkyltransferase	FBgn0024912	DNA dealkylation, involved in DNA repair.											GST	1.35471	34.3			gst	1	1.35471

## Sheet: Secretion
Protein export cluster				scRNAseq: fold enrichment ("FC") and % representation
Characteristic genes				Cattenoz			Tattikota			Fu	Leitão			Cho			Girard		Summary	Mean
Symbol	Name	FlyBase ID	Description	Clust	FC	%	Clust	FC	%	Clust	Clust	FC	%	Clust	FC	%	Clust	Fold	Class	n	FC
Ance	Angiotensin converting enzyme	FBgn0012037	Zinc metallopeptidase, peptidyl-dipeptidase A family. Extracellular glycosylated enzyme, cleaving dipeptides from the C-terminus of oligopeptides.	Pcd	8.46352	98.9	PM6			Tha	MET			PH6			PSC		THA	2	8.46352
CG1648	CG1648	FBgn0033446	Repetitive low-complexity protein. No homolog, except Anopheles	Pcd	2.95553	53.8	LM2			Tha	PLASM2						MZ		THA	2	2.95553
CG15506	CG15506	FBgn0039686	Uncharacterized Pro-rich protein. Pcd neigbor.	Pcd	2.953	38.7				Tha									THA	2	2.953
Letm1	Leucine zipper and EF-hand containing transmembrane protein 1	FBgn0284252	Mitochondrial proton/calcium antiporter. Mediates proton-dependent calcium efflux from mitochondrion.	Pcd	2.34415	51				Tha									THA	2	2.34415
CG30090	CG30090	FBgn0050090	Serine protease. Exported.	Pcd	2.30279	53.8	LM2			Tha				PM1			IZ		THA	2	2.30279
Gmap	Golgi microtubule-associated protein	FBgn0027287	Peripheral Golgi. Early secretory pathway trafficking, probably recruiting Rab proteins and effectors.	Pcd	2.27976	47.6				Tha				PH3			PP		THA	2	2.27976
sel	seele	FBgn0263260	ER-Resident Saposin-like protein, involved in dorsal-ventral patterning by contributing to secretion and activation of the protease ea.	Pcd	2.22278	55	PM5			Tha							X		THA	2	2.22278
Ance-2	Ance-2	FBgn0032535	Dipeptidyl-peptidase. Angiotensin converting enzyme-like.	Pcd	1.53562	19.7	PM11			Tha				PSC					THA	2	1.53562
Spase25	Spase 25-subunit	FBgn0030306	Signal peptidase complex subunit. Protein targeting to ER.	Pcd	1.45881	61.3				Tha									THA	2	1.45881
Tep2	Thioester-containing protein 2	FBgn0041182	Mediates inflammatory response and lowering of carbohydrates and triglycerides in bacteria-infected flies (Shokal 2018)	AMP			LM2			Tha	AMP			LM2					tha	1	–
Arf102F	ADP ribosylation factor at 102F	FBgn0013749	GTP-binding protein. Protein trafficking; may modulate vesicle budding and uncoating within the Golgi apparatus.				LM2			Tha									tha	1	–
TRAM	TRAM	FBgn0040340	Insertion of proteins into ER membrane.	Pcd						Tha									tha	1	–
CG30087	CG30087	FBgn0050087	Serine protease. Exported.							Tha									tha	1	–
zetaCOP	Coat Protein (coatomer) ζ	FBgn0040512	Retrograde transport from the Golgi to ER.							Tha									tha	1	–
Tep4	Thioester-containing protein 4	FBgn0041180	Thiolester containing protein IV	ImpL2			PM6			Tha				PH4			PP		THA	1	–
CG34296	CG34296	FBgn0085325	Diptera (Schizophora)-specific exported peptide.	Pcd	27.5762	91.5													tha	1	27.5762
Pcd	pterin-4a-carbinolamine dehydratase	FBgn0024841	Tetrahydrobiopterin biosynthesis.	Pcd	5.57508	85.2											X		tha	1	5.57508
CG30148	CG30148	FBgn0050148	beta-1,3-glucan recognition protein.	Pcd	2.99275	59.8	PM11							PH6			IZ		tha	1	2.99275
Mthfs	Methenyltetrahydrofolate synthetase	FBgn0085453	Folic acid-containing compound biosynthesis; tetrahydrofolate interconversion.	Pcd	2.25203	57.3								Adi					tha	1	2.25203
Tep1	Thioester-containing protein 1	FBgn0041183	Defence against entomopathogenic fungi, Gram-positive bacteria and parasitoid wasps.	Pcd	2.0066	75.5	PM7				AMP			PM1			IZ		tha	1	2.0066
cer	crammer	FBgn0034443	Cysteine protease inhibitor.	Pcd	1.84829	77.5	LM2				AMP			PM4					tha	1	1.84829
CG32276	CG32276	FBgn0047135	Endoplasmic reticulum unfolded protein response and protein glycosylation.	Pcd	1.72135	73.8													tha	1	1.72135
Sec61γ	Sec61 γ subunit	FBgn0031049	Protein translocation in the endoplasmic reticulum.	Pcd	1.67189	55								PH6					tha	1	1.67189
Ire1	Inositol-requiring enzyme-1	FBgn0261984	Unfolded protein response.	Pcd	1.66254	38.2													tha	1	1.66254
CG11790	CG11790	FBgn0039265	Protein disulfide isomerase superfamily. Thioredoxin domain-containing.	Pcd	1.65678	43.9													tha	1	1.65678
lectin-24Db	lectin-24Db	FBgn0040102	C-type lectin. Lectin domain part similar to LD3, a galactose-specific calcium-dependent lectin that binds to hemocytes, enhances encapsulation and melanization, and agglutinates E.coli.	Pcd	1.62826	79.5	PM12				PLASM1			PM4			PL2		tha	1	1.62826
Gp93	Glycoprotein 93	FBgn0039562	Chaperone. Hsp90 family member, involved in midgut development.	Pcd	1.6255	86.9	PM5							LM2					tha	1	1.6255
Spase12	Spase 12-subunit	FBgn0040623	Signal peptidase complex subunit. Protein export.	Pcd	1.61438	66.1	PM12												tha	1	1.61438
Tapdelta	Translocon-associated protein delta	FBgn0021795	Translocating proteins across the endoplasmic reticulum membrane.	Pcd	1.60005	78.6													tha	1	1.60005
Sec61β	Sec61 β subunit	FBgn0010638	Sec61 translocon. Integrates protein into the lipid bilayer or translocates it across the membrane	Pcd	1.58826	88.6													tha	1	1.58826
Lip4	Lipase 4	FBgn0032264	Foxo target and stress response gene.	Pcd	1.55639	14.2	PM6							PH6			PSC		tha	1	1.55639
CG4793	CG4793	FBgn0028514	Serine pseudoprotease, exported.	Pcd	1.55109	49	LM1				PLASM2			LM1			IZ		tha	1	1.55109
Mef2	Myocyte enhancer factor 2	FBgn0011656	MADS-box transcription factor, required for muscle development.	Pcd	1.5506	47.6													tha	1	1.5506
CG8080	CG8080	FBgn0033373	NAD(+) kinase. NADP biosynthesis.	Pcd	1.49303	83.5								PM4					tha	1	1.49303
CG5112	CG5112	FBgn0039341	Acylglycerol lipase. Conversion of acylglycerol into a fatty acid and glycerol. Related: CG5191, CG8839, CG7910, CG7900, CG5112, Glutamyl-tRNA amidotransferase.	Pcd	1.48468	38.5													tha	1	1.48468
rdx	roadkill	FBgn0264493	Substrate recognition component of Cul3-based E3 ubiquitin ligase complexes. Hedgehog signaling: Cubitus interruptus degradation.	Pcd	1.45519	60.4													tha	1	1.45519
CaBP1	calcium-binding protein 1	FBgn0025678	Phagocytosis of apoptotic cells.	Pcd	1.44589	65	PM5												tha	1	1.44589
Spp	Signal peptide peptidase	FBgn0031260	Intramembrane protease. Presenilin/signal peptide peptidase.	Pcd	1.434	45.9													tha	1	1.434
Rack1	Receptor of activated protein kinase C 1	FBgn0020618	Cytosolic adaptor protein. Interacts with a wide variety of proteins. Required for IRES-mediated translation.	Pcd	1.43302	100													tha	1	1.43302
CG17271	CG17271	FBgn0038829	Salivary gland-expressed low-complexity protein (QH-rich), EF hand.	Pcd	1.4275	50.4													tha	1	1.4275
Oat	Ornithine aminotransferase precursor	FBgn0022774	Ornithine metabolism. Arginine catabolism.	Pcd	1.41704	87.5					MET			Adi			X		tha	1	1.41704
l(1)G0320	lethal (1) G0320	FBgn0028327	Signal sequence receptor subunit 1. Translocon-associated protein.	Pcd	1.41569	86.9													tha	1	1.41569
CG5885	CG5885	FBgn0025700	Translocon-associated protein subunit gamma. SRP-dependent cotranslational protein targeting to membrane	Pcd	1.41525	74.1													tha	1	1.41525
rgr	regular	FBgn0267792	Zinc finger C2H2 transcription factor.	Pcd	1.40948	42.5											CC		tha	1	1.40948
CG6231	CG6231	FBgn0038720	Solute carrier family 22 (SLC22) member. Organic cation, organic anion and organic zwiterrion/cation transporter. Mutant sensitive to Metarhizium (Lu-2015).	Pcd	1.40588	13.7	LM2										PP		tha	1	1.40588
twr	twisted bristles roughened eye	FBgn0262801	Signal peptidase complex (SPC).	Pcd	1.39633	45.9													tha	1	1.39633
CG4678	CG4678	FBgn0030778	Exported Zn metallocarboxypeptidase.	Pcd	1.37828	16.2													tha	1	1.37828
CG34348	CG34348	FBgn0085377	Phospholipid/glycerol acyltransferase. Phospholipid biosynthesis.	Pcd	1.37626	19.1													tha	1	1.37626
RpL24	Ribosomal protein L24	FBgn0032518	Ribosomal protein.	Pcd	1.36679	100	PM6												tha	1	1.36679
SrpRα	Signal recognition particle receptor α	FBgn0010391	Component of the SRP (signal recognition particle) receptor. Targeting of secretory proteins to the ER membrane.	Pcd	1.36594	27.4													tha	1	1.36594
fabp	fatty acid bindin protein	FBgn0037913	Cytosolic fatty-acid binding. Long-term memory.	Pcd	1.3635	100	PM10				MET								tha	1	1.3635
Pdcd4	Programmed cell death 4	FBgn0030520	Positive regulation of stem cell differentiation. Initiation factor eIF-4 gamma, MA3.	Pcd	1.36095	45.9	PM11												tha	1	1.36095
RpS17	Ribosomal protein S17	FBgn0005533	Ribosomal protein.	Pcd	1.35725	100													tha	1	1.35725

## Sheet: Mitotic
Mitotic clusters				scRNAseq: fold enrichment ("FC") and % representation
Characteristic genes				Cattenoz			Tattikota			Fu	Leitão			Cho			Girard		Summary	Mean
Symbol	Name	FlyBase ID	Description	Clust	FC	%	Clust	FC	%	Clust	Clust	FC	%	Clust	FC	%	Clust	Fold	Class	n	FC
stg	string	FBgn0003525	Protein-tyrosine-phosphatase. Activates cyclin dependent kinase causing mitotic entry.	prolif	9.73791	70.5	PM9							PH2			X	29.7067	MIT	2	17.0083
dup	double parked	FBgn0000996	DNA replication, glial cell development, antimicrobial humoral response (Kleino 2005)														X	10.7101	mit	1	10.7101
Incenp	Inner centromere protein	FBgn0260991	Chromosome passenger complex. Targeting Aurora B kinase to particular locations within the mitotic cell. Histone H3 phosphorylation, metaphase chromosome alignment, kinetochore disjunction, and chromosome segregation.	prolif	3.75303	56.8	PM2										X	5.99829	MIT	2	4.74465
RnrL	Ribonucleoside diphosphate reductase large subunit	FBgn0011703	Provides precursors for DNA synthesis. Biosynthesis of deoxyribonucleotides from the corresponding ribonucleotides.	prolif	2.9019	47.7											X	7.67778	MIT	2	4.72019
scra	scraps	FBgn0261385	Anilin homolog. Pleckstrin homology domain. Binds actin, nonmuscle myosin II and microtubules. Stabilizes the contractile ring and is required for completion of cytokinesis.	prolif	2.7777	43.2	PM2										X	7.45055	MIT	2	4.54922
PCNA	Proliferating cell nuclear antigen	FBgn0005655	DNA polymerase-delta/epsilon processivity factor. Encircles DNA, tethers DNA polymerase to the DNA template. Controls G1/S transition	prolif	2.60929	38.6								PH1			X	7.72747	MIT	2	4.49034
dap	dacapo	FBgn0010316	Cyclin-dependent kinase inhibitor. Required after the last mitosis for arresting cells in G1/G0 before terminal differentiation in many post-mitotic cells.	prolif	2.03198	31.8											X	8.83666	MIT	2	4.23744
Ote	Otefin	FBgn0266420	Nuclear membrane-associated protein. Oogenesis and germline stem cell self-renewal and differentiation.	prolif	2.69392	52.3	PM2										X	5.91554	MIT	2	3.99199
Mcm3	Minichromosome maintenance 3	FBgn0284442	A component of the MCM2-7 hexamer, which forms part of the CMG complex. The CMG complex is the main DNA helicase during DNA replication.	prolif	1.99544	22.7											X	7.89228	MIT	2	3.96844
Pen	Pendulin	FBgn0267727	Importin-alpha family, nuclear transport, binding cargo protein to the nuclear import receptor Fs(2)Ket. Also centrosome duplication, mitotic spindle dynamics, nuclear envelope assembly, ring canal formation.	prolif	3.44188	79.5	PM9										X	4.27972	MIT	2	3.838
RpA-70	Replication Protein A 70	FBgn0010173	Single-stranded DNA binding. DNA-dependent DNA replication.	prolif	2.27357	52.3	PM5							GST			X	6.26869	MIT	2	3.77522
Claspin	Claspin	FBgn0052251	Nuclear protein. ATR-Chk1 checkpoint pathway. Required for the cell cycle checkpoint induced at midblastula transition.	prolif	1.57206	18.2											X	9.06562	MIT	2	3.77514
borr	borealin-related	FBgn0032105	Chromosome passenger complex. Histone phosphorylation; mitotic cytokinesis.	prolif	2.35657	50											X	6.00866	MIT	2	3.76295
Cks30A	Cyclin-dependent kinase subunit 30A	FBgn0010314	Required for meiotic and mitotic division through an interaction with Cdk1 (Cdc2).	prolif	2.03851	27.3	PM2							PH1			X	6.86786	MIT	2	3.74168
sip2	septin interacting protein 2	FBgn0031878	Cellular protein localization and mitotic cytokinesis.	prolif	2.01253	27.3	PM2										X	6.85672	MIT	2	3.71475
Mcm7	Minichromosome maintenance 7	FBgn0020633	A component of the MCM2-7 hexamer, which forms part of the CMG complex. The CMG complex is the main DNA helicase during DNA replication.	prolif	1.80376	27.3											X	7.51184	MIT	2	3.68097
Klp61F	Kinesin-like protein at 61F	FBgn0004378	Kinesin-5 family cytoskeletal motor protein. Critical for mitosis and chromosome segregation.	prolif	2.90904	50	PM9										X	4.55954	MIT	2	3.64196
pav	pavarotti	FBgn0011692	ATPase; microtubule motor. Negative regulator of canonical Wnt signaling.	prolif	1.76252	22.7	PM2										X	7.36837	MIT	2	3.60373
cmet	CENP-meta	FBgn0040232	Microtubule motor ATPase. Mitotic metaphase plate congression.	prolif	2.03972	27.3	PM2										X	6.36248	MIT	2	3.60245
polo	polo	FBgn0003124	Regulates nuclear and cytoplasmic aspects of the mitotic cycle.	prolif	3.56251	54.5	PM9	1.75321	43.8								X	7.41706	MIT	3	3.59148
Caf1-180	Chromatin assembly factor 1, p180 subunit	FBgn0030054	Couples DNA replication to histone deposition. DNA endoduplication and double-strand DNA break repair.	prolif	1.48813	20.5											X	8.66534	MIT	2	3.59098
msd1	mitotic spindle density 1	FBgn0035209	Augmin complex subunit. Binds microtubules, recruits gamma tubulin. Microtubule nucleation. Facilitates chromosome segregation.	prolif	1.59862	18.2	PM2										X	7.92589	MIT	2	3.55956
aurB	IplI-aurora-like kinase	FBgn0024227	Serine-threonine kinase, member of the chromosomal passenger complex. Mitosis, correction of erroneous chromosome-spindle interactions, chromosome condensation, kinetochore assembly, spindle assembly checkpoint and cytokinesis.	prolif	1.77345	25	PM2										X	7.07459	MIT	2	3.54209
Ts	Thymidylate synthase	FBgn0024920	dTMP biosynthesis.	prolif	1.83912	27.3											X	6.79464	MIT	2	3.53499
CG42232	CG42232	FBgn0250754	Uncharacterized, SMAD/FHA domain. Large protein, titin-like?	prolif	2.20062	36.4	PM2										X	5.48547	MIT	2	3.4744
nesd	nessun dorma	FBgn0032848	Spermatocyte (and oocyte?) cytokinesis. Ring canal formation in male and female germline cells.	prolif	1.79415	27.3											X	6.4936	MIT	2	3.41328
sti	sticky	FBgn0002466	AGC family kinase. Regulates both actin-myosin-mediated cytokinesis and epigenetic gene silencing.	prolif	1.76765	20.5											X	6.50395	MIT	2	3.39068
mad2	mad2	FBgn0035640	Conserved component of the spindle checkpoint.	prolif	1.70648	15.9											X	6.72547	MIT	2	3.38776
feo	fascetto	FBgn0030241	Binds the central spindle microtubules. Required for proper midbody formation and cytokinesis. Centrosome duplication and neurogenesis.	prolif	1.92553	25	PM9							PH1			X	5.73391	MIT	2	3.32277
Mink	Mitotic spindle and nuclear protein	FBgn0039250	Establishment of mitotic spindle localization; mitotic chromosome condensation; and mitotic cytokinesis.	prolif	2.03345	31.8											X	5.26775	MIT	2	3.27288
CycB	Cyclin B	FBgn0000405	Induces the start of mitosis.	prolif	2.89732	52.3	PM9	1.70195	40.8								X	6.96216	MIT	3	3.2501
Mcm6	Minichromosome maintenance 6	FBgn0025815	Subunit of the eukaryotic replicative DNA helicase.	prolif	1.62618	15.9											X	6.25839	MIT	2	3.19018
Rif1	Rap1 interacting factor 1 homolog	FBgn0050085	Binds protein phosphatase PP1. Required for temporal regulation of replication initiation.	prolif	2.00832	27.3											X	5.02216	MIT	2	3.17586
Slbp	Stem-loop binding protein	FBgn0041186	3' end processing of histone pre-mRNAs	prolif	1.53558	18.2								PH1			X	6.03711	MIT	2	3.04474
Chrac-14	Chromatin accessibility complex 14kD protein	FBgn0043002	Nucleosome sliding enzyme. DNA damage response.	prolif	1.47759	13.6											X	6.24153	MIT	2	3.03684
CG1265	CG1265	FBgn0035517	Drosophila-specific SLC66A3 (solute carrier family 66 member 3) ortholog. Overexpression: enlarged lymph gland (Stofanko-2008).	prolif	1.98245	27.3	PM12							PM4			X	4.46221	MIT	2	2.97424
RfC4	Replication factor C subunit 4	FBgn0260985	DNA damage checkpoint; DNA replication; and DNA replication checkpoint.	prolif	1.741	22.7								PH1			X	5.07451	MIT	2	2.97233
ncd	non-claret disjunctional	FBgn0002924	Minus-end-directed kinesin ATPase. Microtubule motor protein, required for spindle assembly in oocytes and chromosome attachment to spindles.	prolif	2.45429	38.6	PM2	1.43642	34.2								X	7.23525	MIT	3	2.94366
SMC2	Structural maintenance of chromosomes 2	FBgn0027783	Condensin subunit. Chromosome condensation and cell division.	prolif	1.46687	18.2											X	5.72307	MIT	2	2.89741
tum	tumbleweed	FBgn0086356	GTPase activating protein for Rho family GTPases involved in Wnt signalling regulation.	prolif	2.38002	43.2	PM2	1.45389	35.2								X	6.52282	MIT	3	2.82607
CG14561	CG14561	FBgn0037149	Uncharacterized Diptera/Siphonaptera-specific protein.	prolif	1.46905	20.5											X	5.35809	MIT	2	2.80558
Gnf1	Germ line transcription factor 1	FBgn0004913	Elongation of primed DNA templates by DNA polymerase delta and epsilon.	prolif	1.50459	18.2											X	5.14454	MIT	2	2.78216
sle	slender lobes	FBgn0037810	Nucleolus. sle depletion alters the aggregation of nucleolar components and results in retardation of proliferation of Kenyon cells.	prolif	1.71487	22.7	PM6										X	4.34078	MIT	2	2.72834
Mcm2	Minichromosome maintenance 2	FBgn0014861	Mcm2-7 complex (Mcm complex). Replicative helicase essential for 'once per cell cycle' DNA replication initiation and elongation in eukaryotic cells.	prolif	1.38432	11.4											X	5.35685	MIT	2	2.72316
CycE	Cyclin E	FBgn0010382	Control of the cell cycle at the G1/S (start) transition. Positive regulator of JAK-STAT signaling.	prolif	1.38087	15.9											X	5.31249	MIT	2	2.70848
CG10863	CG10863	FBgn0027552	Aldo/keto reductase: Indanol dehydrogenase, alcohol dehydrogenase, aldehyde reductase	prolif	1.89461	40.9											X	3.80329	MIT	2	2.68436
Nuf2	Nuf2	FBgn0031886	Mitotic metaphase plate congression.	prolif	1.44228	15.9											X	4.86843	MIT	2	2.64983
BubR1	Bub1-related kinase	FBgn0263855	C-terminal serine-threonine kinase. Spindle assembly checkpoint signalling, stabilization of kinetochore-microtuble attachments and chromosome alignment.	prolif	1.48125	15.9											X	4.6915	MIT	2	2.63615
Rcc1	Regulator of chromosome condensation 1	FBgn0002638	Ran GEF. Nucleo-cytoplasmic shuttling of specific proteins. Chromatin condensation.	prolif	1.59643	25											X	4.25643	MIT	2	2.60674
Cdk2	Cyclin-dependent kinase 2	FBgn0004107	Controls progression through the G1 and S phases of the cell cycle and endoreduplication cycles.	prolif	1.52806	22.7											X	4.37205	MIT	2	2.58471
Rrp1	Recombination repair protein 1	FBgn0004584	Cellular response to oxidative stress, Promoting DNA repair.	prolif	1.58859	29.5											X	4.16622	MIT	2	2.57263
dnk	deoxyribonucleoside kinase	FBgn0022338	Phosphorylating thymidine, 2'-deoxyriboadenosine, 2'-deoxyribocytidine and 2'-deoxyriboguanosine.	prolif	1.50458	15.9											X	4.39395	MIT	2	2.5712
mud	mushroom body defect	FBgn0002873	Regulates spindle orientation via interactions with the dynein complex.	prolif	2.10426	34.1											X	3.10438	MIT	2	2.55586
Cdk1	Cyclin-dependent kinase 1	FBgn0004106	Cdk1 complexes with either CycA, CycB or CycB3 control important aspects of progression through the cell cycle.	prolif	1.64345	22.7								PH1			X	3.78592	MIT	2	2.49439
sub	subito	FBgn0003545	Kinesin-6 protein. Bundles antiparallel microtubules. Cytokinesis in mitosis. Spindle organization and chromosome segregation in female meiosis.	prolif	1.42955	13.6											X	4.34851	MIT	2	2.49327
asp	abnormal spindle	FBgn0000140	Maintains structure of the centrosomal microtubule organizing center (MTOC) during mitosis.	prolif	1.38674	13.6											X	4.47714	MIT	2	2.49171
CycB3	Cyclin B3	FBgn0015625	Cyclin. Specific role in activating the APC/C-dependent degradation pathway.	prolif	1.48573	15.9											X	4.1077	MIT	2	2.47041
DNApol-α180	DNA polymerase α 180kD subunit	FBgn0259113	DNA-directed DNA polymerase. DNA replication.	prolif	1.68679	22.7											X	3.56226	MIT	2	2.45128
Klp3A	Kinesin-like protein at 3A	FBgn0011606	Microtubule motor protein. Chromosome segregation, mitotic spindle morphogenesis.	prolif	1.59234	15.9											X	3.74389	MIT	2	2.44162
dgt2	dim γ-tubulin 2	FBgn0032390	Augmin complex. Centrosome-independent generation of spindle microtubules	prolif	1.54696	20.5											X	3.64039	MIT	2	2.37308
Acf	ATP-dependent chromatin assembly factor large subunit	FBgn0027620	Modulates nucleosome sliding.	prolif	1.50845	25								PH1			X	3.68689	MIT	2	2.35828
CG12702	CG12702	FBgn0031070	SMC (structural maintenance of chromosomes) superfamily.	prolif	1.5158	18.2											X	3.65519	MIT	2	2.35384
CG13690	CG13690	FBgn0031252	RNase HII subunit. DNA replication. Degrades RNA in RNA:DNA hybrids. Removal of lagging-strand Okazaki fragment RNA.	prolif	1.58828	18.2											X	3.44461	MIT	2	2.33901
lin-52	lin-52	FBgn0029800	MuvB core complex. Controlling cell cycle regulators, and other genes.	prolif	1.43363	13.6											X	3.80391	MIT	2	2.33526
Skp2	S-phase kinase-associated protein 2	FBgn0037236	Mitotic cell cycle. Substrate recognizing component of the SCF-Skp2 ubiquitin ligase, targeting dacapo for destruction.	prolif	1.70232	25											X	3.20134	MIT	2	2.33446
nebu	nebulosa	FBgn0036316	Transmembrane transport of sugars (glucose, fructose, dehydroascorbic acid) across the plasma membrane by facilitated diffusion.	prolif	1.63124	29.5											X	3.33232	MIT	2	2.33148
dre4	dre4	FBgn0002183	Chromatin regulator. Chromatin transcription (FACT) protein complex. FACT facilitates GAGA factor-directed chromatin remodeling.	prolif	2.0234	45.5											X	2.66524	MIT	2	2.32225
BthD	BthD selenoprotein	FBgn0030501	Selenoprotein. Salivary gland development, lifespan. Redox process?	prolif	1.49874	18.2											X	3.46875	MIT	2	2.28008
Nnf1a	Nnf1a	FBgn0034523	Component of the Mis12 complex, in the kinetochore. Mitosis.	prolif	1.47264	13.6											X	3.43947	MIT	2	2.25058
RanGAP	Ran GTPase activating protein	FBgn0003346	Nucleocytoplasmic transport shuttling cycle of Ran. Segregation distorter.	prolif	1.40261	15.9											X	3.54689	MIT	2	2.23045
Cdc45	Cell division cycle 45	FBgn0026143	3'-5' DNA helicase of Cdc45/Mcm2-7/GINS complex. Chromosome condensation, mitotic G1/S transition.	prolif	1.37317	15.9											X	3.57998	MIT	2	2.21719
spidey	spidey	FBgn0029975	Short chain dehydrogenase/reductase. Metabolism of ecdysteroids and cuticular hydrocarbons.	prolif	1.88371	54.5											X	2.60858	MIT	2	2.21671
Klp67A	Kinesin-like protein at 67A	FBgn0004379	Microtubule motor protein. Chromosome congression and mitotic spindle morphogenesis.	prolif	1.6418	18.2	PM9										X	2.90089	MIT	2	2.18235
RPA3	Replication protein A3	FBgn0266421	Maintenance of the neuronal stem cell population.	prolif	1.61627	29.5	PM5										X	2.92427	MIT	2	2.17403
CG13096	CG13096	FBgn0032050	RNA binding. Maturation of LSU-rRNA. Ribosomal protein L1-like.	prolif	1.90506	45.5	CC1										X	2.41905	MIT	2	2.14672
CG15107	CG15107	FBgn0041702	Myb/SANT-like DNA-binding domain.	prolif	1.43451	18.2											X	2.96758	MIT	2	2.06326
CG8478	CG8478	FBgn0037746	Zn finger C2H2 transcription factor.	prolif	1.54512	25											X	2.73585	MIT	2	2.05602
PolD1	DNA polymerase delta subunit 1	FBgn0263600	Genome replication, including lagging strand synthesis, DNA recombination and repair.	prolif	1.42203	13.6											X	2.95579	MIT	2	2.05018
eco	Establishment of cohesion	FBgn0035766	Acetyltransferase. Histone acetylation and mitotic sister chromatid cohesion.	prolif	1.70049	27.3											X	2.37659	MIT	2	2.01031
Zw10	Zeste-white 10	FBgn0004643	Kinetochores. Spindle assembly checkpoint, ensuring connections between chromosomes and the mitotic spindle.	prolif	1.459	25											X	2.7266	MIT	2	1.99452
Sps1	Selenophosphate synthetase 1	FBgn0261270	Regulates the intracellular levels of glutamine. Negative regulation of reactive oxygen species metabolism.	prolif	1.64273	40.9											X	2.37347	MIT	2	1.97458
CG12123	CG12123	FBgn0030039	Uncharacterized metazoan protein, not in H. sapiens.	prolif	1.51698	20.5											X	2.52394	MIT	2	1.95673
gce	germ cell-expressed bHLH-PAS	FBgn0261703	Transcription factor, paralogous to Met. Juvenile hormone receptor.	prolif	1.5945	25											X	2.34079	MIT	2	1.93194
Mlh1	Mlh1	FBgn0011659	MutHLS pathway, DNA mismatch repair.	prolif	1.36356	15.9											X	2.71349	MIT	2	1.92354
CG31301	CG31301	FBgn0051301	NF-κB-repression factor. Transcriptional repression of certain NF-κB-responsive genes.	prolif	1.60367	40.9											X	2.28362	MIT	2	1.91368
mus101	mutagen-sensitive 101	FBgn0002878	DNA replication checkpoint during mitosis.	prolif	1.44817	13.6											X	2.37414	MIT	2	1.85423
RhoGAP54D	Rho GTPase activating protein at 54D	FBgn0034249	RhoGAP.	prolif	1.37348	11.4											X	2.28108	MIT	2	1.77003
Grip91	Gamma-tubulin ring protein 91	FBgn0001612	Male meiotic division. Organization of the meiotic spindle.	prolif	1.43191	20.5											X	2.00686	MIT	2	1.69518
fru	fruitless	FBgn0004652	BTB Zn finger transcription factor. Sexual differentiation of neural circuits.	prolif	1.38535	15.9					PLASM2			PH1			X	2.0226	MIT	2	1.67392
Mcm5	Minichromosome maintenance 5	FBgn0017577	Mitotic DNA replication. Required to resolve meiotic double-strand breaks into crossovers.														X	9.63989	mit	1	9.63989
dpa	disc proliferation abnormal	FBgn0015929	Mcm2-7 complex. Replicative helicase essential for 'once per cell cycle' DNA replication initiation and elongation in eukaryotic cells.														X	8.35696	mit	1	8.35696
CG10336	CG10336	FBgn0032698	Progression of S-phase. Survival after DNA damage or replication stress.	prolif													X	8.31107	mit	1	8.31107
glu	gluon	FBgn0015391	Subunit of the condensin complex. Chromosome condensation and sister chromatid segregation.														X	7.30975	mit	1	7.30975
Kmn1	kinetochore Mis12-Ndc80 network component 1	FBgn0027259	Movement of chromosomes during mitosis.	prolif													X	6.52181	mit	1	6.52181
msd5	mitotic spindle density 5	FBgn0035210	Centrosome-independent generation of spindle microtubules.											PH1			X	6.50207	mit	1	6.50207
CG8173	CG8173	FBgn0030864	Lymphokine-activated killer T-cell-originated protein kinase.														X	5.98702	mit	1	5.98702
Naa40	N(alpha)-acetyltransferase 40	FBgn0039687	Histone acetyltransferase. Negative regulator of apoptosis. Hepatic lipid metabolism.														X	5.8816	mit	1	5.8816
dgt4	dim γ-tubulin 4	FBgn0026085	Augmin complex. Centrosome-independent generation of spindle microtubules. Regulation of mitotic nuclear division.														X	5.53954	mit	1	5.53954
CG7272	CG7272	FBgn0036501	Sugar transmembrane transporter.	prolif													X	5.36327	mit	1	5.36327
Poc1	Proteome of centrioles 1	FBgn0036354	Cytoplasmic protein in the sperm giant centriole. Assists in the elongation of the giant centrioles and recruitment of centriolar proteins.				PM9										X	5.31892	mit	1	5.31892
Cdc6	Cdc6	FBgn0035918	pre-Replication complex. Chromosomal origin of replication, required for the initiation of DNA replication.														X	5.29419	mit	1	5.29419
Ppn	Papilin	FBgn0003137	Extracellular matrix. Cell rearrangements, modulating metalloproteinases.	prolif	5.22757	79.5	PM12			Ppn	PLASM1			PM1			PL2		mit	1	5.22757
mei-38	meiotic 38	FBgn0260986	Microtubule-associated. Functions in mitosis and meiosis.														X	5.13135	mit	1	5.13135
Fs(2)Ket	Female sterile (2) Ketel	FBgn0262743	Nuclear protein import, formation of the spindle apparatus and nuclear envelope assembly.														X	5.01627	mit	1	5.01627
stai	stathmin	FBgn0266521	Regulation of the cell cytoskeleton. Regulatory protein of microtubule dynamics.	LM1			PM10										X	4.95035	mit	1	4.95035
Map60	Microtubule-associated protein 60	FBgn0010342	Component of a centrosomal complex that can interact with microtubules.														X	4.77663	mit	1	4.77663
CG5757	CG5757	FBgn0034299	Thymidylate kinase, dTDP, dTTP, dUDP biosynthesis.														X	4.62942	mit	1	4.62942
WRNexo	WRN exonuclease	FBgn0038608	3'-5' exonuclease. DNA replication. Resolving Holliday junctions or other unusual DNA structures. DNA replication, recombination and repair.	prolif													X	4.47766	mit	1	4.47766
msb1l	msb1l	FBgn0027949	Orthologous to human CDCA3 (cell division cycle associated 3).														X	4.34442	mit	1	4.34442
RecQ4	RecQ4 helicase	FBgn0040290	DNA replication and repair. Genome stability and DNA metabolism.														X	4.3181	mit	1	4.3181
Nup35	Nucleoporin 35kDa	FBgn0030943	Nuclear pore complex. Organization of the inner nuclear membrane proteins.														X	4.3144	mit	1	4.3144
Hml	Hemolectin	FBgn0029167	Chitin binding multidomain receptor. Mutant sensitive to Metarhizium (Lu-2015).	prolif	4.29453	95.5	PM12				PLASM1			PM1			PL2		mit	1	4.29453
CG5498	CG5498	FBgn0027565	Late endosome to vacuole transport. Multivesicular body sorting pathway. Vesicle budding.														X	4.28826	mit	1	4.28826
Ndc80	Ndc80	FBgn0030500	Kinetochore protein Ndc80. Chromosome segregation; mitotic metaphase plate congression.	prolif													X	4.28593	mit	1	4.28593
C1GalTA	Core 1 Galactosyltransferase A	FBgn0032078	Synthesis of T antigen in hemocytes. Hematopoietic stem cell maintenance Fuwa-2015.	robo2													X	4.15041	mit	1	4.15041
Spc25	Spc25	FBgn0087021	Essential kinetochore constituent.														X	4.12948	mit	1	4.12948
CG30094	CG30094	FBgn0050094	AN1-like Zinc finger. Related to human SMUBP-2; RNA and DNA ATP-dependent helicase and transcription regulator.														X	4.11625	mit	1	4.11625
XNP	XNP	FBgn0039338	Heterochromatin maintenance, chromosomal stability.														X	4.04929	mit	1	4.04929
Ibf2	Insulator binding factor 2	FBgn0037669	Chromatin insulator sequence binding. Chromatin silencing.														X	4.00241	mit	1	4.00241
CG12592	CG12592	FBgn0037811	Paralog of Slender lobes (Sle); Nucleolus organization.														X	3.99726	mit	1	3.99726
fzy	fizzy	FBgn0001086	Ubiquitin ligase of the anaphase-promoting complex/cyclosome (APC/C) in mitosis and meiosis. Drives metaphase and anaphase transition.														X	3.98654	mit	1	3.98654
Dpck	Dephospho-CoA kinase	FBgn0037469															X	3.9848	mit	1	3.9848
HipHop	HP1-HOAP-interacting protein	FBgn0036815		prolif													X	3.96763	mit	1	3.96763
pbl	pebble	FBgn0003041															X	3.95918	mit	1	3.95918
grp	grapes	FBgn0261278												Adi			X	3.92669	mit	1	3.92669
cid	centromere identifier	FBgn0040477															X	3.9027	mit	1	3.9027
CG3430	CG3430	FBgn0031875															X	3.85317	mit	1	3.85317
CG13559	CG13559	FBgn0034870	LITAF motif, Possible membrane-associated motif in LPS-induced tumor necrosis factor alpha factor (LITAF), also known as PIG7 (CG13559 gene symbol:CG13559 FBgn0034870 )	Inos										LM1			X	3.80983	mit	1	3.80983
pch2	pachytene checkpoint 2	FBgn0051453	Meiotic recombination checkpoint.														X	3.80502	mit	1	3.80502
Psf2	CG18013	FBgn0261976															X	3.75641	mit	1	3.75641
CG4036	CG4036	FBgn0032149															X	3.74546	mit	1	3.74546
CG11164	CG11164	FBgn0030507															X	3.70653	mit	1	3.70653
rig	rigor mortis	FBgn0250850															X	3.69451	mit	1	3.69451
Smn	survival motor neuron	FBgn0036641												PH1			X	3.67506	mit	1	3.67506
ball	ballchen	FBgn0027889															X	3.66683	mit	1	3.66683
MED22	Mediator complex subunit 22	FBgn0040339															X	3.61423	mit	1	3.61423
DNApol-α73	DNA polymerase α 73kD	FBgn0005696															X	3.59826	mit	1	3.59826
NSD	CG4976	FBgn0039559															X	3.59392	mit	1	3.59392
spd-2	spindle defective 2	FBgn0027500	Centriole and centrosome protein. Centrosome assembly.	prolif													X	3.58432	mit	1	3.58432
Myb	Myb oncogene-like	FBgn0002914															X	3.58041	mit	1	3.58041
CG1271	CG1271	FBgn0035392	Pseudo-glycerol kinase. Homologous to glycerol kinases but lack functional residues for this activity.														X	3.57918	mit	1	3.57918
CG6693	CG6693	FBgn0037878															X	3.57699	mit	1	3.57699
Aldh	Aldehyde dehydrogenase	FBgn0012036	Mitochondrial aldehyde dehydrogenase. Detoxifying aldehydes.	prolif	3.5542	72.7				Ppn									mit	1	3.5542
CG12104	CG12104	FBgn0035238															X	3.54338	mit	1	3.54338
Nplp2	Neuropeptide-like precursor 2	FBgn0287423	Neuropeptide, unknown function. Upregulated in hemolymph after E. coli and M. luteus infection (Vierstraete 2006).	prolif	3.52287	90.9	PM12			Ppn	PLASM1			PM1					mit	1	3.52287
Rpb7	CG31155	FBgn0051155															X	3.5155	mit	1	3.5155
Dref	DNA replication-related element factor	FBgn0015664															X	3.50959	mit	1	3.50959
RfC3	Replication factor C subunit 3	FBgn0032244	DNA replication. Unloads the DNA polymerase processivity factor proliferating cell nuclear antigen (PCNA) from chromatin.	prolif													X	3.49853	mit	1	3.49853
β4GalT7	β-4-galactosyltransferase 7	FBgn0039258															X	3.48271	mit	1	3.48271
CG34437	CG34437	FBgn0085466	Serine pseudoprotease, wasp-induced (2-5-fold , Shannon).	prolif	3.47616	68.2	PM12				PLASM1			PM1			PL2		mit	1	3.47616
Klp10A	Kinesin-like protein at 10A	FBgn0030268	Induces microtubule depolymerization. Regulates length and dynamics of microtubules.														X	3.4722	mit	1	3.4722
Det	Deterin	FBgn0264291															X	3.46399	mit	1	3.46399
Aprt	Adenine phosphoribosyltransferase	FBgn0000109															X	3.46146	mit	1	3.46146
CG8520	CG8520	FBgn0033734															X	3.46085	mit	1	3.46085
Ndc1	Nuclear division cycle 1	FBgn0039125	Nucleoporin complex.														X	3.45045	mit	1	3.45045
CycA	Cyclin A	FBgn0000404												PH1			X	3.4395	mit	1	3.4395
Cenp-C	CG31258	FBgn0266916															X	3.41315	mit	1	3.41315
bora	aurora borealis	FBgn0259791		prolif													X	3.38668	mit	1	3.38668
Galk	Galactokinase	FBgn0263199															X	3.3717	mit	1	3.3717
CG9752	CG9752	FBgn0034614															X	3.36791	mit	1	3.36791
Chd3	CG9594	FBgn0023395															X	3.36179	mit	1	3.36179
CG12391	CG12391	FBgn0033581															X	3.35071	mit	1	3.35071
Sdhaf3	CG14898	FBgn0038437															X	3.3179	mit	1	3.3179
CG2046	CG2046	FBgn0037378															X	3.31185	mit	1	3.31185
DNApol-α60	DNA polymerase α 60kD	FBgn0259676															X	3.30062	mit	1	3.30062
pim	pimples	FBgn0003087	Securin, binding to the endoprotease separase. Mitotic sister chromatid segregation.														X	3.29596	mit	1	3.29596
Dp	DP transcription factor	FBgn0011763												PH1			X	3.28438	mit	1	3.28438
tra	transformer	FBgn0003741															X	3.28429	mit	1	3.28429
CG31648	CG31648	FBgn0051648															X	3.26916	mit	1	3.26916
prod	proliferation disrupter	FBgn0014269															X	3.2588	mit	1	3.2588
CG3176	CG3176	FBgn0029524	Cd27 binding protein (Siva) ;Siva binds to the CD27 cytoplasmic tail. It has a DD homology region, a box-B-like ring finger, and a zinc finger-like domain. Overexpression of Siva in various cell lines induces apoptosis, suggesting an important role for Siva in the CD27-transduced apoptotic pathway.														X	3.25688	mit	1	3.25688
Papst2	PAPS transporter 2	FBgn0036695															X	3.2527	mit	1	3.2527
mip40	Myb-interacting protein 40	FBgn0034430															X	3.24213	mit	1	3.24213
Phf7	PHD finger protein 7 ortholog	FBgn0031091															X	3.23629	mit	1	3.23629
CG6650	CG6650	FBgn0036402	ADP-specific phosphofructokinase/glucokinase. Carbohydrate metabolism.	robo2													X	3.23124	mit	1	3.23124
Spc105R	Spc105-related	FBgn0037025	Essential component of the kinetochore.														X	3.20364	mit	1	3.20364
CG3663	CG3663	FBgn0035044															X	3.17833	mit	1	3.17833
squ	squash	FBgn0267347															X	3.15656	mit	1	3.15656
HP5	Heterochromatin protein 5	FBgn0030301															X	3.15197	mit	1	3.15197
Bub3	Bub3	FBgn0025457	Spindle assembly checkpoint (SAC) pathway. Mitotic checkpoint complex														X	3.14662	mit	1	3.14662
phr	photorepair	FBgn0003082															X	3.12916	mit	1	3.12916
CG7638	CG7638	FBgn0036133															X	3.08402	mit	1	3.08402
CG3732	CG3732	FBgn0034750															X	3.07318	mit	1	3.07318
PolE2	DNA polymerase epsilon subunit 2	FBgn0035644	Non-catalytic subunit of the major replicative polymerase DNApolε. Regulation of DNA endoreduplication.														X	3.05426	mit	1	3.05426
Aac11	Aac11	FBgn0027885															X	3.04627	mit	1	3.04627
ckn	caskin	FBgn0033987	Cytoplasmic adaptor protein that intreacts with Lar and dock.	PL3										PH1			X	3.03486	mit	1	3.03486
Mes4	Mesoderm-expressed 4	FBgn0034726															X	3.02393	mit	1	3.02393
aurA	aurora A	FBgn0000147	Protein kinase, regulating assymmetric protein localization. Spindle orientation, centrosome separation and pole cell formation.														X	3.02376	mit	1	3.02376
kuk	kugelkern	FBgn0038476	Lamin-like nuclear envelope protein. Nuclear elongation during cellularization.														X	3.01337	mit	1	3.01337
Nse1	Non-SMC element 1	FBgn0031848	SUMO-ligase and a putative ubiquitin-ligase. DNA repair.														X	3.01041	mit	1	3.01041
CG11679	CG11679	FBgn0030678															X	3.00503	mit	1	3.00503
ScsβG	CG10622	FBgn0029118															X	3.0028	mit	1	3.0028
CG8142	CG8142	FBgn0030871															X	2.9819	mit	1	2.9819
CG34001	CG34001	FBgn0054001															X	2.9809	mit	1	2.9809
CG12018	CG12018	FBgn0027903															X	2.97563	mit	1	2.97563
Cp1	Cysteine proteinase-1	FBgn0013770	Lysosomal cysteine peptidase, expressed in hemocytes and elsewhere.	prolif	2.96762	90.9	PM9				PLASM1			LM2					mit	1	2.96762
CG17266	CG17266	FBgn0033089															X	2.95033	mit	1	2.95033
Rnp4F	RNA-binding protein 4F	FBgn0014024															X	2.94964	mit	1	2.94964
geminin	geminin	FBgn0033081	Interacts with the dup replication factor. Regulates the Egfr pathway, DNA replication and chromosome ploidy.														X	2.94107	mit	1	2.94107
Sgf11	CG13379	FBgn0036804															X	2.92702	mit	1	2.92702
CG1673	CG1673	FBgn0030482	Branched-chain-amino-acid transaminase. Branched-chain amino acid biosynthesis.														X	2.92523	mit	1	2.92523
mRpS14	mitochondrial ribosomal protein S14	FBgn0044030															X	2.92338	mit	1	2.92338
Sec22	Sec22 ortholog (S. cerevisiae)	FBgn0260855															X	2.90535	mit	1	2.90535
Plp	Pericentrin-like protein	FBgn0086690	Mutant resistant to Metarhizium (Lu-2015).				PM12										X	2.89922	mit	1	2.89922
CG12744	CG12744	FBgn0033459	Zinc finger C2H2 transcription factor. Hematopoiesis. Mutant sensitive to B. bassiana (Jin-2008).				PM12										X	2.8951	mit	1	2.8951
CG13937	CG13937	FBgn0035287	Carbohydrate sulfotransferase. Glycosylation.														X	2.88741	mit	1	2.88741
Orc6	Origin recognition complex subunit 6	FBgn0023180															X	2.87958	mit	1	2.87958
Mms19	CG12005	FBgn0037301															X	2.87016	mit	1	2.87016
CG7737	CG7737	FBgn0033584	Oxidoreductases. Human spermine oxidase-like.														X	2.86248	mit	1	2.86248
CG2162	CG2162	FBgn0035388	Human Coiled-coil domain-containing protein R3HC1/R3HCL-like. Unknown function.														X	2.85979	mit	1	2.85979
CG12129	CG12129	FBgn0033475															X	2.85889	mit	1	2.85889
CG12288	CG12288	FBgn0032620															X	2.85567	mit	1	2.85567
Mkrn1	Makorin 1	FBgn0029152															X	2.85373	mit	1	2.85373
Cse1	Chromosome segregation 1	FBgn0022213															X	2.85052	mit	1	2.85052
CG15908	CG15908	FBgn0033085	Uncharacterized protein.														X	2.84198	mit	1	2.84198
CG8128	CG8128	FBgn0030668															X	2.83909	mit	1	2.83909
CysRS	Cysteinyl-tRNA synthetase	FBgn0027091															X	2.82502	mit	1	2.82502
Alr	Augmenter of liver regeneration	FBgn0031068															X	2.82409	mit	1	2.82409
CG2147	CG2147	FBgn0030025															X	2.81928	mit	1	2.81928
icln	CG4924	FBgn0029079															X	2.81728	mit	1	2.81728
snRNP-U1-70K	small ribonucleoprotein particle U1 subunit 70K	FBgn0016978															X	2.81592	mit	1	2.81592
CG12895	CG12895	FBgn0033523															X	2.80898	mit	1	2.80898
Lime	Linking Immunity and Metabolism	FBgn0033458	C2H2 Zn finger transcription factor. Mutant fails metabolic changes essential for the larval immune response (Mihajlovic 2019).				CC1							PM2			X	2.80871	mit	1	2.80871
CG31360	CG31360	FBgn0051360															X	2.80686	mit	1	2.80686
wake	wide awake	FBgn0266418	Multi-domain signaling protein that regulates asymmetric cell division, cell polarization, spindle orientation, and asymmetric protein localization, regulation of circadian timing of sleep onset. Upregulates the GABA receptor Rdl in the arousal-promoting large ventrolateral neurons. Regulates the timing of sleep onset.														X	2.80643	mit	1	2.80643
CG3021	CG3021	FBgn0040337	2-thiolation of uridine at the wobble position of mitochondrial tRNA(Lys), tRNA(Glu) and tRNA(Gln).														X	2.79987	mit	1	2.79987
tra2	transformer 2	FBgn0003742															X	2.78799	mit	1	2.78799
dUTPase	Deoxyuridine triphosphatase	FBgn0250837		prolif	2.78543	54.5													mit	1	2.78543
CG2021	CG2021	FBgn0035271					PM12										X	2.77688	mit	1	2.77688
Orc2	Origin recognition complex subunit 2	FBgn0015270															X	2.77565	mit	1	2.77565
Pisd	CG5991	FBgn0026576															X	2.77523	mit	1	2.77523
CG44774	CG44774	FBgn0266000															X	2.77353	mit	1	2.77353
CG31712	CG31712	FBgn0051712															X	2.77048	mit	1	2.77048
Pp4-19C	Protein phosphatase 19C	FBgn0023177															X	2.76454	mit	1	2.76454
Sld5	CG14549	FBgn0039403															X	2.76054	mit	1	2.76054
HDAC1	Histone deacetylase 1	FBgn0015805	Nucleosome remodelling and deacetylase (NuRD) complex, mediates transcriptional repression.				PM9										X	2.7583	mit	1	2.7583
Chro	Chromator	FBgn0044324															X	2.75821	mit	1	2.75821
snf	sans fille	FBgn0003449															X	2.7568	mit	1	2.7568
CG9471	CG9471	FBgn0037749															X	2.75587	mit	1	2.75587
CG6236	CG6236	FBgn0038318	Alkaline-phosphatase-like?	Pcd										PH6			X	2.75551	mit	1	2.75551
CG14434	CG14434	FBgn0029915		prolif													X	2.7555	mit	1	2.7555
Cap-D2	CAP-D2 condensin subunit	FBgn0039680	Condensin I complex, associates with mitotic chromatin.	prolif													X	2.75459	mit	1	2.75459
CG6617	CG6617	FBgn0030944															X	2.75454	mit	1	2.75454
UGP	UGP	FBgn0035978	UTP–glucose-1-phosphate uridylyltransferase. Glycogen/UDP-glucose metabolism.														X	2.75379	mit	1	2.75379
CG15922	CG15922	FBgn0040575					PM12										X	2.75195	mit	1	2.75195
CG12321	CG12321	FBgn0038577															X	2.74514	mit	1	2.74514
CG14057	CG14057	FBgn0036696															X	2.7413	mit	1	2.7413
rod	rough deal	FBgn0003268	Major subunit of the Rod-Zw10-Zwilch (RZZ) complex, an essential component of the outer kinetochore during mitosis.														X	2.73507	mit	1	2.73507
Dpy-30L1	Dpy-30-like 1	FBgn0032293															X	2.73411	mit	1	2.73411
Ibf1	Insulator binding factor 1	FBgn0037670	Chromatin insulator sequence binding. Regulation of chromatin silencing.														X	2.73394	mit	1	2.73394
CG18004	CG18004	FBgn0033566															X	2.73036	mit	1	2.73036
CG13865	CG13865	FBgn0039965															X	2.7288	mit	1	2.7288
CG12034	CG12034	FBgn0035421															X	2.72814	mit	1	2.72814
PolE1	DNA polymerase epsilon subunit 1	FBgn0264326	Large subunit of the major replicative polymerase DNApolε. Regulation of DNA endoreduplication.														X	2.72549	mit	1	2.72549
Pex11	Peroxin 11	FBgn0034058	Peroxisome, Membrane. Required for peroxisome biogenesis.														X	2.72018	mit	1	2.72018
CG46280//CG46280	CG12360	FBgn0283438//FBgn0283439															X	2.70736	mit	1	2.70736
mRpL36	mitochondrial ribosomal protein L36	FBgn0042112															X	2.70677	mit	1	2.70677
CG11403	CG11403	FBgn0026876															X	2.7027	mit	1	2.7027
san	separation anxiety	FBgn0024188															X	2.70246	mit	1	2.70246
Sbat	CG31950	FBgn0051950															X	2.70239	mit	1	2.70239
Aladin	Aladin	FBgn0030122															X	2.69739	mit	1	2.69739
Uch-L5	Ubiquitin carboxy-terminal hydrolase L5 ortholog	FBgn0011327															X	2.69433	mit	1	2.69433
gb	genderblind	FBgn0039487	Amino acid transporter. Glutamate secretion into the extracellular space. Regulates glutamate receptor abundance in the nervous system.	robo2													X	2.69362	mit	1	2.69362
Ctf4	Chromosome transmission fidelity 4	FBgn0033890	Anaphase-promoting complex subunit 4.														X	2.69151	mit	1	2.69151
CG10512	CG10512	FBgn0037057		prolif	2.68979	47.7													mit	1	2.68979
CG3358	CG3358	FBgn0033117															X	2.68518	mit	1	2.68518
Iswi	Imitation SWI	FBgn0011604															X	2.68385	mit	1	2.68385
spt4	CG12372	FBgn0028683															X	2.67685	mit	1	2.67685
Acn	Acinus	FBgn0263198															X	2.67375	mit	1	2.67375
eIF2Bβ	eukaryotic translation initiation factor 2B subunit β	FBgn0024996	Translation initiation factor.														X	2.67168	mit	1	2.67168
strat	CG7787	FBgn0032020															X	2.67015	mit	1	2.67015
Kank	Kank	FBgn0027596												PH1			X	2.66732	mit	1	2.66732
Bin1	Bicoid interacting protein 1	FBgn0024491	Recruits Sin3A-HDAC1 histone deacetylase co-repressor to transcription factors (e.g. bcd, Kr, Trl).	vir1													X	2.66537	mit	1	2.66537
Nup107	Nucleoporin 107kD	FBgn0027868															X	2.66435	mit	1	2.66435
RanBP3	Ran binding protein 3	FBgn0039110															X	2.65996	mit	1	2.65996
CG5934	CG5934	FBgn0039505					LM2										X	2.65711	mit	1	2.65711
CG5126	CG5126	FBgn0031320															X	2.65578	mit	1	2.65578
CG9125	CG9125	FBgn0030793	RAI1-like. Decapping and 5'-3' exoribonuclease. mRNA 5'-end capping quality control mechanism.														X	2.65282	mit	1	2.65282
CDK2AP1	CG18292	FBgn0030269															X	2.64585	mit	1	2.64585
Snr1	Snf5-related 1	FBgn0011715															X	2.64319	mit	1	2.64319
CG14695	CG14695	FBgn0037850	Uncharacterized insect protein family. Thioredoxin-like domain (partial).				PM5										X	2.64308	mit	1	2.64308
Syx18	Syntaxin 18	FBgn0039212															X	2.64272	mit	1	2.64272
Rbf	Retinoblastoma-family protein	FBgn0015799															X	2.63841	mit	1	2.63841
CG2767	CG2767	FBgn0037537															X	2.63733	mit	1	2.63733
CG12170	CG12170	FBgn0037356															X	2.63426	mit	1	2.63426
CG1218	CG1218	FBgn0037377															X	2.63251	mit	1	2.63251
CG13890	CG13890	FBgn0035169															X	2.63222	mit	1	2.63222
A16	CG9933	FBgn0028965															X	2.63084	mit	1	2.63084
CG33213	CG33213	FBgn0053213															X	2.6297	mit	1	2.6297
CG17556	CG17556	FBgn0038462															X	2.62888	mit	1	2.62888
mRpS34	mitochondrial ribosomal protein S34	FBgn0285951															X	2.62845	mit	1	2.62845
CG1622	CG1622	FBgn0030468	Pre-mRNA-splicing factor 38. PRP38 domain, related to mRNA splicing factor PRP38 from yeast														X	2.62832	mit	1	2.62832
AP-2α	Adaptor Protein complex 2, α subunit	FBgn0264855															X	2.62712	mit	1	2.62712
CG11851	CG11851	FBgn0039293															X	2.62671	mit	1	2.62671
U2A	CG1406	FBgn0033210															X	2.62615	mit	1	2.62615
CG34159	CG34159	FBgn0085188	MAPK-regulated corepressor-interacting protein														X	2.62168	mit	1	2.62168
lic	licorne	FBgn0261524															X	2.62148	mit	1	2.62148
CG6907	CG6907	FBgn0031711															X	2.6188	mit	1	2.6188
mEFTs	CG6412	FBgn0032646															X	2.61783	mit	1	2.61783
wac	wee Augmin	FBgn0035120															X	2.61776	mit	1	2.61776
asf1	anti-silencing factor 1	FBgn0029094															X	2.61767	mit	1	2.61767
CG30105	CG30105	FBgn0050105															X	2.61384	mit	1	2.61384
CG3803	CG3803	FBgn0034938															X	2.61239	mit	1	2.61239
Arp6	Actin-related protein 6	FBgn0011741															X	2.60901	mit	1	2.60901
SMC1	CG6057	FBgn0040283															X	2.60775	mit	1	2.60775
mRpS10	mitochondrial ribosomal protein S10	FBgn0038307															X	2.60254	mit	1	2.60254
Cnx99A	Calnexin 99A	FBgn0015622	ER chaperone, colocalizes and genetically interacts with the sodium channel subunit para. Transition of proteins from the ER to the outer cellular membrane.														X	2.59465	mit	1	2.59465
CG5323	CG5323	FBgn0034362															X	2.5932	mit	1	2.5932
CG14721	CG14721	FBgn0037942															X	2.59227	mit	1	2.59227
Df31	Decondensation factor 31	FBgn0022893	Histone-binding protein; nucleosome assembly.	prolif	2.59168	93.2	PM6												mit	1	2.59168
Orc4	Origin recognition complex subunit 4	FBgn0023181															X	2.59133	mit	1	2.59133
Mesh1	Metazoan SpoT homolog-1	FBgn0039650															X	2.59007	mit	1	2.59007
CG2034	CG2034	FBgn0015359															X	2.57927	mit	1	2.57927
Sccpdh1	Saccheropin dehydrogenase 1	FBgn0037298	Saccharopine dehydrogenase. Glycolipid biosynthesis.														X	2.57833	mit	1	2.57833
UbcE2H	CG2257	FBgn0029996												Adi			X	2.5741	mit	1	2.5741
Cyp6v1	CG1829	FBgn0031126												Adi			X	2.57345	mit	1	2.57345
Pym	within bgcn	FBgn0034918															X	2.57311	mit	1	2.57311
cav	caravaggio	FBgn0026257															X	2.57253	mit	1	2.57253
mod(mdg4)	modifier of mdg4	FBgn0002781															X	2.57244	mit	1	2.57244
CG1598	CG1598	FBgn0033191	Tail-anchored membrane protein insertion into ER membrane.														X	2.57176	mit	1	2.57176
Coprox	Coproporphyrinogen oxidase	FBgn0021944	Heme biosynthesis.														X	2.57099	mit	1	2.57099
Caf1-105	CG12892	FBgn0033526															X	2.57057	mit	1	2.57057
CG11590	CG11590	FBgn0030545															X	2.56687	mit	1	2.56687
Pbgs	Porphobilinogen synthase	FBgn0036271															X	2.56536	mit	1	2.56536
Dim1	CG3058	FBgn0031601															X	2.56517	mit	1	2.56517
CoRest	CoRest	FBgn0261573	Transcription corepressor.				PM12							PH1			X	2.56482	mit	1	2.56482
rgn	regeneration	FBgn0261258	C-type lectin, tissue regeneration.				PM6										X	2.56347	mit	1	2.56347
CG11454	CG11454	FBgn0031224															X	2.56276	mit	1	2.56276
CG2091	CG2091	FBgn0037372															X	2.56108	mit	1	2.56108
Psa	Puromycin sensitive aminopeptidase	FBgn0261243															X	2.56062	mit	1	2.56062
armi	armitage	FBgn0041164															X	2.5606	mit	1	2.5606
CG1640	CG1640	FBgn0030478	Pyridoxal phosphate-dependent transferase. Vitamin B6 transfer for amino acid biosynthesizing enzymes.														X	2.55982	mit	1	2.55982
Zwilch	CG18729	FBgn0061476	Mutant sensitive to Metarhizium (Lu-2015).														X	2.55916	mit	1	2.55916
Cep135	CG17081	FBgn0036480		prolif													X	2.5567	mit	1	2.5567
CG13601	CG13601	FBgn0039126															X	2.55589	mit	1	2.55589
Pabp2	CG2163	FBgn0005648															X	2.55546	mit	1	2.55546
CG14286	CG14286	FBgn0038673															X	2.55526	mit	1	2.55526
Nup154	Nucleoporin 154kD	FBgn0021761															X	2.55315	mit	1	2.55315
Mis12	CG18156	FBgn0035725															X	2.55179	mit	1	2.55179
DNAlig1	DNA ligase I	FBgn0262619															X	2.54791	mit	1	2.54791
CG12848	CG12848	FBgn0040666															X	2.5448	mit	1	2.5448
U4-U6-60K	U4-U6 small nuclear riboprotein factor 60K	FBgn0036733															X	2.5425	mit	1	2.5425
CG42271	CG42271	FBgn0259166															X	2.54215	mit	1	2.54215
CG32708	CG32708	FBgn0052708															X	2.53941	mit	1	2.53941
DNApol-α50	DNA polymerase α 50kD	FBgn0011762															X	2.53933	mit	1	2.53933
rev7	CG2948	FBgn0037345												GST			X	2.53643	mit	1	2.53643
pen-2	presenilin enhancer	FBgn0053198															X	2.53564	mit	1	2.53564
pzg	putzig	FBgn0259785															X	2.53165	mit	1	2.53165
RhoGEF4	Rho guanine nucleotide exchange factor 4	FBgn0035761	Rho Guanine Nucleotide Exchange Factor (RhoGEF). Rho protein signal transduction; stress fiber assembly.	prolif										PH1			X	2.52867	mit	1	2.52867
LBR	Lamin B receptor	FBgn0034657															X	2.52855	mit	1	2.52855
Pop2	CG5684	FBgn0036239															X	2.52785	mit	1	2.52785
CG9853	CG9853	FBgn0086605															X	2.51651	mit	1	2.51651
esc	extra sexcombs	FBgn0000588															X	2.51368	mit	1	2.51368
CG14671	CG14671	FBgn0037340															X	2.51243	mit	1	2.51243
Fmr1	CG6203	FBgn0028734															X	2.51228	mit	1	2.51228
Cdk7	Cyclin-dependent kinase 7	FBgn0263237															X	2.51226	mit	1	2.51226
MRG15	CG6363	FBgn0027378															X	2.51209	mit	1	2.51209
Cp190	Centrosomal protein 190kD	FBgn0000283															X	2.5118	mit	1	2.5118
CG6565	CG6565	FBgn0032513															X	2.51056	mit	1	2.51056
CG7277	CG7277	FBgn0031713															X	2.50863	mit	1	2.50863
CG5339	CG5339	FBgn0034925															X	2.5078	mit	1	2.5078
PIG-B	CG12006	FBgn0035464															X	2.50713	mit	1	2.50713
RhoBTB	Rho-related BTB domain containing	FBgn0036980															X	2.50639	mit	1	2.50639
CG6903	CG6903	FBgn0029737	Acyl transferase.Human heparan-alpha-glucosaminide N-acetyltransferase-like. Lysosomal transport.														X	2.50455	mit	1	2.50455
RnpS1	RNA-binding protein S1	FBgn0037707															X	2.50436	mit	1	2.50436
Snp	Snipper	FBgn0265192	Exonuclease in the DnaQ-H family.	robo2													X	2.49906	mit	1	2.49906
CG8481	CG8481	FBgn0037747															X	2.49141	mit	1	2.49141
mRpS35	mitochondrial ribosomal protein S35	FBgn0035374															X	2.4849	mit	1	2.4849
Idh3b	CG6439	FBgn0038922															X	2.48411	mit	1	2.48411
Sas10	Something about silencing 10 ortholog (S. cerevisiae)	FBgn0029755															X	2.48129	mit	1	2.48129
CG10214	CG10214	FBgn0039115															X	2.48124	mit	1	2.48124
CG1418	CG1418	FBgn0033468	Similar to prenylated rab acceptor protein, a Rab guanine dissociation inhibitor (GDI) displacement factor.														X	2.47955	mit	1	2.47955
TfIIFα	Transcription factor IIFα	FBgn0010282															X	2.47903	mit	1	2.47903
CG33052	CG33052	FBgn0053052															X	2.47785	mit	1	2.47785
Uggt	UDP-glucose-glycoprotein glucosyltransferase	FBgn0014075	UDP-glucose-glycoprotein glucosyltransferase, an enzyme that distinguishes between denatured and native proteins.														X	2.47698	mit	1	2.47698
CG15653	CG15653	FBgn0034578															X	2.4767	mit	1	2.4767
mRpL44	mitochondrial ribosomal protein L44	FBgn0037330															X	2.47347	mit	1	2.47347
γTub23C	γ-Tubulin at 23C	FBgn0260639															X	2.47232	mit	1	2.47232
GatA	glutamyl-tRNA amidotransferase subunit A	FBgn0260779	Related: CG5191, CG8839, CG7910, CG7900, CG5112, Glutamyl-tRNA amidotransferase.														X	2.47083	mit	1	2.47083
CG6066	CG6066	FBgn0039488															X	2.46947	mit	1	2.46947
CG11334	CG11334	FBgn0039849															X	2.46562	mit	1	2.46562
rnh1	ribonuclease H1	FBgn0023171															X	2.46373	mit	1	2.46373
DppIII	Dipeptidyl aminopeptidase III	FBgn0037580															X	2.4621	mit	1	2.4621
CG5641	CG5641	FBgn0038046															X	2.45697	mit	1	2.45697
CG5516	CG5516	FBgn0038389															X	2.45617	mit	1	2.45617
Pex2	Peroxin 2	FBgn0035876															X	2.45608	mit	1	2.45608
endos	endosulfine	FBgn0061515					PM10							PH1			X	2.45436	mit	1	2.45436
Syn1	Syntrophin-like 1	FBgn0037130	Mutant sensitive to Metarhizium (Lu-2015). Adaptor protein associated with the Dystrophin glycoprotein complex.				PM11							CC1			X	2.45408	mit	1	2.45408
CNPYb	CG11577	FBgn0036847															X	2.45266	mit	1	2.45266
Dek	CG5935	FBgn0026533															X	2.45056	mit	1	2.45056
Ptpa	Phosphotyrosyl phosphatase activator	FBgn0016698															X	2.4499	mit	1	2.4499
Nup54	Nucleoporin 54kD	FBgn0033737															X	2.44954	mit	1	2.44954
Nup358	Nucleoporin 358kD	FBgn0039302															X	2.4484	mit	1	2.4484
CG5787	CG5787	FBgn0032454															X	2.4482	mit	1	2.4482
Uba3	Ubiquitin activating enzyme 3	FBgn0263697															X	2.447	mit	1	2.447
CG1737	CG1737	FBgn0030293															X	2.4459	mit	1	2.4459
CG1628	CG1628	FBgn0030218	Mitochondrial ornithine transport (CG1628 gene symbol:CG1628 FBgn0030218 (GO:0000064 ornithine transporter) (GO:0005740 mitochondrial membrane) (GO:0005386 carrier) (GO:0005743 mitochondrial inner membrane))														X	2.44222	mit	1	2.44222
tzn	CG4365	FBgn0037024															X	2.44133	mit	1	2.44133
APC10	Anaphase Promoting Complex subunit 10	FBgn0034231															X	2.44061	mit	1	2.44061
Nup205	Nucleoporin 205kD	FBgn0031078															X	2.43811	mit	1	2.43811
lncRNA:CR31044	long non-coding RNA:CR31044	FBgn0051044	Long non-coding RNA.											PH1			X	2.43482	mit	1	2.43482
TH1	CG9984	FBgn0010416															X	2.43458	mit	1	2.43458
SCCRO	CG7427	FBgn0036510															X	2.43435	mit	1	2.43435
lok	loki	FBgn0019686															X	2.43305	mit	1	2.43305
msps	mini spindles	FBgn0027948															X	2.43008	mit	1	2.43008
M1BP	Motif 1 Binding Protein	FBgn0037621															X	2.42745	mit	1	2.42745
CG10802	CG10802	FBgn0029664															X	2.4265	mit	1	2.4265
Hydr1	α/β hydrolase 1	FBgn0033382															X	2.42647	mit	1	2.42647
CG3630	CG3630	FBgn0023540															X	2.4263	mit	1	2.4263
CG7946	CG7946	FBgn0039743															X	2.42466	mit	1	2.42466
mip130	Myb-interacting protein 130	FBgn0023509															X	2.42327	mit	1	2.42327
Pfas	Phosphoribosylformylglycinamidine synthase	FBgn0000052	Inosine monophosphate (IMP) biosynthesis. Sleep.														X	2.42309	mit	1	2.42309
NO66	CG2982	FBgn0266570															X	2.42265	mit	1	2.42265
SRm160	CG11274	FBgn0036340															X	2.42206	mit	1	2.42206
Rrp46	Rrp46	FBgn0037815	The RNA exosome complex, a 3'-5' exonuclease complex in nucleus and cytoplasm. Process and degrade many types of RNA.														X	2.42018	mit	1	2.42018
DCP1?	Decapping protein 1	FBgn0034921															X	2.41957	mit	1	2.41957
Nup214	Nucleoporin 214kD	FBgn0010660															X	2.4174	mit	1	2.4174
Nipsnap	CG9212	FBgn0030724															X	2.41655	mit	1	2.41655
CG34015	CG34015	FBgn0054015															X	2.4164	mit	1	2.4164
polybromo	CG11375	FBgn0039227															X	2.41537	mit	1	2.41537
BCL7-like	CG17252	FBgn0026149															X	2.41508	mit	1	2.41508
CG3436	CG3436	FBgn0031229															X	2.40867	mit	1	2.40867
Sms	CG4300	FBgn0036272															X	2.40676	mit	1	2.40676
Reph	Regulator of eph expression	FBgn0021800															X	2.40516	mit	1	2.40516
CG7506	CG7506	FBgn0035805															X	2.40442	mit	1	2.40442
Gk1	Glycerol kinase	FBgn0025592															X	2.40436	mit	1	2.40436
GABPI	β4GalNAcTB pilot	FBgn0031495															X	2.40294	mit	1	2.40294
SMC5	Structural maintenance of chromosomes 5	FBgn0052438	ATPase, involved in chromosome organization and critical to genome stability.														X	2.401	mit	1	2.401
vito	viriato	FBgn0052418															X	2.39771	mit	1	2.39771
CG2277	CG2277	FBgn0035204	5'-nucleotidase; haloacid dehalogenase. Human 5'-nucleotidase domain-containing protein-like.														X	2.39699	mit	1	2.39699
CLS	cardiolipin synthase	FBgn0039360															X	2.39348	mit	1	2.39348
l(3)neo43	lethal (3) neo43	FBgn0011476															X	2.38884	mit	1	2.38884
Psf1	Partner of Sld Five 1	FBgn0035194	Cdc45/Mcm2-7/GINS (CMG) complex, anATP-dependent DNA helicase. Regulation of the mitotic G1/S transition.														X	2.38705	mit	1	2.38705
XRCC1	CG4208	FBgn0026751															X	2.38667	mit	1	2.38667
JMJD4	CG7200	FBgn0032671															X	2.3864	mit	1	2.3864
CG14341	CG14341	FBgn0031315															X	2.38523	mit	1	2.38523
Psi	P-element somatic inhibitor	FBgn0014870															X	2.38053	mit	1	2.38053
CG7110	CG7110	FBgn0032521															X	2.37668	mit	1	2.37668
CG10939	SRY interacting protein 1	FBgn0010620															X	2.3765	mit	1	2.3765
vers	lethal (3) j2D3	FBgn0011335															X	2.37462	mit	1	2.37462
Hat1	CG2051	FBgn0037376															X	2.3744	mit	1	2.3744
Pop2//Caf1-55	Pop2//Chromatin assembly factor 1, p55 subunit	FBgn0036239//FBgn0263979															X	2.37364	mit	1	2.37364
Ge-1	Ge-1 ortholog (H. sapiens)	FBgn0283682															X	2.37318	mit	1	2.37318
Nup62	Nucleoporin 62kD	FBgn0034118															X	2.37109	mit	1	2.37109
Nup58	Nucleoporin 58kD	FBgn0038722															X	2.37074	mit	1	2.37074
smid	smallminded	FBgn0016983															X	2.36957	mit	1	2.36957
metl	methyltransferase-like	FBgn0035247															X	2.36954	mit	1	2.36954
CG5068	CG5068	FBgn0035951															X	2.36903	mit	1	2.36903
Alg10	ALG10 α-1,2-glucosyltransferase	FBgn0052076	Protein N-linked glycosylation.														X	2.36672	mit	1	2.36672
mRpS30	mitochondrial ribosomal protein S30	FBgn0030692															X	2.36664	mit	1	2.36664
Pcd	pterin-4a-carbinolamine dehydratase	FBgn0024841	Tetrahydrobiopterin biosynthesis.	Pcd													X	2.36597	mit	1	2.36597
CG8149	CG8149	FBgn0037700															X	2.36467	mit	1	2.36467
thoc6	CG5632	FBgn0036263															X	2.36437	mit	1	2.36437
timeout	CG7855	FBgn0038118															X	2.36227	mit	1	2.36227
Lsm10	CG12938	FBgn0033554															X	2.3616	mit	1	2.3616
udd	under-developed	FBgn0033261					PM9										X	2.36064	mit	1	2.36064
U2af38	U2 small nuclear riboprotein auxiliary factor 38	FBgn0017457	Small subunit of the pre-mRNA splicing factor complex U2AF. Binds to the AG dinucleotide at the 3' splice site.	CC													X	2.35998	mit	1	2.35998
Roe1	CG6155	FBgn0014877															X	2.3584	mit	1	2.3584
Fen1	Flap endonuclease 1	FBgn0025832															X	2.35817	mit	1	2.35817
brm	brahma	FBgn0000212	ATPase subunit of the Brahma chromatin-remodeling complex. Regulates Egfr signalling, stem cell proliferation, and innate immune response. Transcriptional coactivator OR corepressor.														X	2.35738	mit	1	2.35738
Scox	Synthesis of cytochrome c oxidase	FBgn0262467															X	2.35684	mit	1	2.35684
CG11562	CG11562	FBgn0031247															X	2.35679	mit	1	2.35679
x16	CG10203	FBgn0028554					PM12										X	2.35204	mit	1	2.35204
CG11208	CG11208	FBgn0034488															X	2.35057	mit	1	2.35057
Ccm3	Cerebral cavernous malformation 3	FBgn0038331															X	2.34913	mit	1	2.34913
E2f2	E2F transcription factor 2	FBgn0024371															X	2.34558	mit	1	2.34558
Vsp37A	modifier of rudimentary	FBgn0016038															X	2.34344	mit	1	2.34344
Mat1	Menage a trois 1 ortholog (H. sapiens)	FBgn0024956															X	2.34322	mit	1	2.34322
mRpL10	mitochondrial ribosomal protein L10	FBgn0031231															X	2.34302	mit	1	2.34302
CG31126	CG31126	FBgn0051126															X	2.34289	mit	1	2.34289
CG4593	CG4593	FBgn0029929															X	2.34107	mit	1	2.34107
Bap170	Brahma associated protein 170kD	FBgn0042085															X	2.34058	mit	1	2.34058
CG3402	CG3402	FBgn0035148															X	2.34008	mit	1	2.34008
mRpL45	mitochondrial ribosomal protein L45	FBgn0263863	Mitochondrial ribosome.														X	2.3388	mit	1	2.3388
Bdbt	Bride of doubletime	FBgn0038857															X	2.3359	mit	1	2.3359
CG3420	CG3420	FBgn0033100															X	2.33247	mit	1	2.33247
CG6607	CG6607	FBgn0039204															X	2.33186	mit	1	2.33186
LSm3	CG31184	FBgn0051184															X	2.33111	mit	1	2.33111
CG4598	CG4598	FBgn0032160	Fatty acid beta-oxidation.														X	2.33056	mit	1	2.33056
CSN6	COP9 complex homolog subunit 6	FBgn0028837															X	2.33025	mit	1	2.33025
CG6171	CG6171	FBgn0026737															X	2.32965	mit	1	2.32965
CG15536	CG15536	FBgn0039766															X	2.3289	mit	1	2.3289
mRpL17	mitochondrial ribosomal protein L17	FBgn0035122															X	2.32846	mit	1	2.32846
Spx	Spliceosomal protein on the X	FBgn0015818															X	2.32838	mit	1	2.32838
HP1c	Heterochromatin Protein 1c	FBgn0039019															X	2.32783	mit	1	2.32783
CG7332	CG7332	FBgn0030973															X	2.32625	mit	1	2.32625
CG4042	CG4042	FBgn0037018															X	2.32347	mit	1	2.32347
Uba5	CG1749	FBgn0030305															X	2.32329	mit	1	2.32329
CG14894	CG14894	FBgn0038428	Transmembrane transporter. Protein targeting to mitochondrion.				LM2										X	2.32293	mit	1	2.32293
tex	CG9615	FBgn0037569															X	2.32293	mit	1	2.32293
CG13365	CG13365	FBgn0029529	Uncharacterized insect protein.														X	2.32209	mit	1	2.32209
mRpL54	mitochondrial ribosomal protein L54	FBgn0034579															X	2.32202	mit	1	2.32202
CG3542	CG3542	FBgn0031492															X	2.3191	mit	1	2.3191
CG12107	CG12107	FBgn0033209															X	2.3177	mit	1	2.3177
l(3)87Df	lethal (3) 87Df	FBgn0002354															X	2.31754	mit	1	2.31754
MCPH1	Microcephalin	FBgn0260959															X	2.31747	mit	1	2.31747
CG4957	CG4957	FBgn0032205															X	2.31732	mit	1	2.31732
Top2	Topoisomerase 2	FBgn0284220												PH1			X	2.31608	mit	1	2.31608
PCID2	PCI domain-containing protein 2	FBgn0036184															X	2.31329	mit	1	2.31329
mRpL52	mitochondrial ribosomal protein L52	FBgn0033208															X	2.31208	mit	1	2.31208
e(r)	enhancer of rudimentary	FBgn0011586															X	2.31073	mit	1	2.31073
CG1513	CG1513	FBgn0033463															X	2.31064	mit	1	2.31064
CG5181	CG5181	FBgn0031909															X	2.31025	mit	1	2.31025
CG11788	CG11788	FBgn0034495		prolif													X	2.30778	mit	1	2.30778
CG3918	CG3918	FBgn0029873															X	2.30736	mit	1	2.30736
CG33506	CG33506	FBgn0053506															X	2.30699	mit	1	2.30699
CG13018	CG13018	FBgn0040751															X	2.30505	mit	1	2.30505
Cpr	Cytochrome P450 reductase	FBgn0015623															X	2.30418	mit	1	2.30418
RtcB	RtcB RNA ligase	FBgn0032781	tRNA-splicing ligase complex.				PM5										X	2.30401	mit	1	2.30401
CG13630	CG13630	FBgn0039219															X	2.30267	mit	1	2.30267
colt	congested-like trachea	FBgn0019830															X	2.29934	mit	1	2.29934
CRIF	CG7172	FBgn0037102															X	2.29808	mit	1	2.29808
Atx2	Ataxin-2	FBgn0041188	Multi-functional, binds DEAD box helicases and associated with Argonaute. Required for microRNA function. Assembles with polyribosomes and poly(A)-binding protein.	robo2			LM2							LM2			X	2.29744	mit	1	2.29744
DhpD	Dihydropterin deaminase	FBgn0261436															X	2.29739	mit	1	2.29739
Aos1	Activator of SUMO 1	FBgn0029512															X	2.29693	mit	1	2.29693
mor	moira	FBgn0002783															X	2.29627	mit	1	2.29627
CG34150	CG34150	FBgn0083986															X	2.29613	mit	1	2.29613
mRpL34	mitochondrial ribosomal protein L34	FBgn0083983					CC1										X	2.29611	mit	1	2.29611
CG7168	CG7168	FBgn0038586															X	2.29604	mit	1	2.29604
CG11882	CG11882	FBgn0039642		robo2													X	2.29589	mit	1	2.29589
twin	CG31137	FBgn0011725															X	2.29475	mit	1	2.29475
CG32069	CG32069	FBgn0052069					PM12										X	2.29475	mit	1	2.29475
mre11	meiotic recombination 11	FBgn0020270	DNA double-strand break repair protein.														X	2.29351	mit	1	2.29351
mRpL30	mitochondrial ribosomal protein L30	FBgn0029718															X	2.29334	mit	1	2.29334
Der-2	Derlin-2	FBgn0038438															X	2.29305	mit	1	2.29305
CG17219	CG17219	FBgn0031494															X	2.29052	mit	1	2.29052
Qtzl	Quetzalcoatl	FBgn0051864															X	2.28851	mit	1	2.28851
CG11007	CG11007	FBgn0034455															X	2.28768	mit	1	2.28768
CG3909	CG3909	FBgn0027524															X	2.28755	mit	1	2.28755
CG14215	CG14215	FBgn0031052															X	2.28663	mit	1	2.28663
l(2)35Cc	lethal (2) 35Cc	FBgn0259982															X	2.28567	mit	1	2.28567
GstT1	Glutathione S transferase T1	FBgn0050000					PM5										X	2.28531	mit	1	2.28531
for	foraging	FBgn0000721	Protein Kinase G (PKG) family. Controls feeding behavior and locomotion.														X	2.2844	mit	1	2.2844
CG9921	CG9921	FBgn0030743															X	2.2842	mit	1	2.2842
Ulp1	CG12359	FBgn0027603															X	2.28305	mit	1	2.28305
Yip1d1	Yip1 domain-containing 1	FBgn0032465	Neuron and spermatid development.														X	2.28157	mit	1	2.28157
lds	lodestar	FBgn0002542															X	2.28154	mit	1	2.28154
Taf10b	TBP-associated factor 10b	FBgn0026324															X	2.28123	mit	1	2.28123
CG4880	CG4880	FBgn0030803	Uncharacterized insect protein. Torsin-like.														X	2.28039	mit	1	2.28039
beg	bad egg	FBgn0036691															X	2.27994	mit	1	2.27994
CG4849	CG4849	FBgn0039566	U5 small nuclear ribonucleoprotein particle (U5 snRNP); interacts with the 5' and 3' exons. Spliceosome; mRNA splicing.														X	2.27905	mit	1	2.27905
CG34117	CG34117	FBgn0083953															X	2.27898	mit	1	2.27898
pic	piccolo	FBgn0260962															X	2.27825	mit	1	2.27825
CG17493	CG17493	FBgn0040010															X	2.27785	mit	1	2.27785
l(2)tid	lethal (2) tumorous imaginal discs	FBgn0002174	Hsp40-like. DnaJ domain chaperone.														X	2.27687	mit	1	2.27687
Actn	α actinin	FBgn0000667															X	2.27649	mit	1	2.27649
CG33969	CG33969	FBgn0053969															X	2.27633	mit	1	2.27633
wmd	wing morphogenesis defect	FBgn0034876															X	2.27059	mit	1	2.27059
Arl6IP1	ADP-ribosylation factor-like 6 interacting protein 1	FBgn0038453															X	2.26938	mit	1	2.26938
CG15237	CG15237	FBgn0033104															X	2.26906	mit	1	2.26906
CG4627	CG4627	FBgn0033808															X	2.26772	mit	1	2.26772
DCTN2-p50	Dynamitin	FBgn0021825															X	2.26769	mit	1	2.26769
oaf	out at first	FBgn0011818															X	2.26742	mit	1	2.26742
CG9684	CG9684	FBgn0037583															X	2.26408	mit	1	2.26408
e(y)2	enhancer of yellow 2	FBgn0000618					PM12										X	2.26393	mit	1	2.26393
PpD3	Protein phosphatase D3	FBgn0005777															X	2.26391	mit	1	2.26391
HIP-R	Hsc/Hsp70-interacting protein related	FBgn0029676	Human Hsp70 interacting protein (HIP)-like. Co-chaperone that stabilizes the ADP-bound conformation of Hsp70.														X	2.2636	mit	1	2.2636
r2d2	CG7138	FBgn0031951															X	2.26351	mit	1	2.26351
CG3337	CG3337	FBgn0038871															X	2.26297	mit	1	2.26297
Cdk4	Cyclin-dependent kinase 4	FBgn0016131															X	2.26263	mit	1	2.26263
TORIP	CG14103	FBgn0036908															X	2.26152	mit	1	2.26152
CG4951	CG4951	FBgn0039563															X	2.258	mit	1	2.258
CG12375	CG12375	FBgn0031987	Endo-Rnase. Mitochondrial matrix.														X	2.2565	mit	1	2.2565
CG9662	CG9662	FBgn0031529															X	2.25497	mit	1	2.25497
hop	hopscotch	FBgn0004864	hopscotch, JAK homolog. JAK-STAT signaling.											CC2			X	2.25481	mit	1	2.25481
mRpL20	mitochondrial ribosomal protein L20	FBgn0036335															X	2.25289	mit	1	2.25289
CG17883	CG17883	FBgn0040005															X	2.24996	mit	1	2.24996
Pdha	lethal (1) G0334	FBgn0028325															X	2.24925	mit	1	2.24925
CSN5	COP9 complex homolog subunit 5	FBgn0027053															X	2.24916	mit	1	2.24916
DENR	CG9099	FBgn0030802															X	2.2487	mit	1	2.2487
BCAS2	BCAS2 ortholog	FBgn0039558															X	2.24788	mit	1	2.24788
HP1b	Heterochromatin Protein 1b	FBgn0030082															X	2.24571	mit	1	2.24571
pr	purple	FBgn0003141															X	2.24445	mit	1	2.24445
asl	asterless	FBgn0261004															X	2.24405	mit	1	2.24405
CG15432	CG15432	FBgn0031603															X	2.24256	mit	1	2.24256
CG14903	CG14903	FBgn0038446															X	2.24176	mit	1	2.24176
UK114	CG15261	FBgn0086691		prolif													X	2.24	mit	1	2.24
CG10555	CG10555	FBgn0030034															X	2.23902	mit	1	2.23902
CG8237	CG8237	FBgn0033350															X	2.23841	mit	1	2.23841
CG7927	CG7927	FBgn0027549															X	2.23808	mit	1	2.23808
mRpS18A	mitochondrial ribosomal protein S18A	FBgn0051450															X	2.23778	mit	1	2.23778
CG42694	CG42694	FBgn0261584	Serine protease and pseudoprotease domains. Exported.														X	2.23602	mit	1	2.23602
CG1620	CG1620	FBgn0033183															X	2.23601	mit	1	2.23601
PI31	CG8979	FBgn0033669					PM12										X	2.2328	mit	1	2.2328
MED28	Mediator complex subunit 28	FBgn0039337															X	2.23137	mit	1	2.23137
IntS12	Integrator 12	FBgn0039459															X	2.23019	mit	1	2.23019
CG12081	CG12081	FBgn0030053															X	2.22948	mit	1	2.22948
Sf3b5	CG11985	FBgn0040534															X	2.22883	mit	1	2.22883
inc	insomniac	FBgn0025394															X	2.22728	mit	1	2.22728
CG14806	CG14806	FBgn0029594															X	2.2266	mit	1	2.2266
CG3107	CG3107	FBgn0033005															X	2.22607	mit	1	2.22607
Ssadh	Succinic semialdehyde dehydrogenase	FBgn0039349															X	2.22535	mit	1	2.22535
dgt3	dim γ-tubulin 3	FBgn0034569		prolif													X	2.22378	mit	1	2.22378
dmt	dalmatian	FBgn0278604															X	2.22266	mit	1	2.22266
Flacc	Fl(2)d-associated complex component	FBgn0030974															X	2.22221	mit	1	2.22221
CG11110	CG11110	FBgn0034535															X	2.21977	mit	1	2.21977
wech	wech	FBgn0259745	RBCC/TRIM family of cytoplasmic proteins. Regulator of integrin-mediated adhesion.														X	2.21968	mit	1	2.21968
mRpL16	mitochondrial ribosomal protein L16	FBgn0023519															X	2.21932	mit	1	2.21932
Sptr	Sepiapterin reductase	FBgn0014032															X	2.21929	mit	1	2.21929
Su(var)2-10	Suppressor of variegation 2-10	FBgn0003612	PIAS (protein inhibitor of activated STAT).														X	2.21877	mit	1	2.21877
ksh	kish	FBgn0040890					PM12										X	2.21796	mit	1	2.21796
ste14	isoprenylcysteine carboxylmethyltransferase	FBgn0036336															X	2.21774	mit	1	2.21774
α-Est8	α-Esterase-8	FBgn0015576															X	2.21579	mit	1	2.21579
eIF4G2	eukaryotic translation initiation factor 4G2	FBgn0260634															X	2.2154	mit	1	2.2154
Usp14	CG5384	FBgn0032216															X	2.21426	mit	1	2.21426
ubl	ubiquitin like	FBgn0022224	Regulatory modification of proteins? Positive regulation of Toll signaling (Kanoh 2015).	CC			PM12										X	2.21402	mit	1	2.21402
Dlip2	Dorsal interacting protein 2	FBgn0040466															X	2.21364	mit	1	2.21364
galla-1	CG30152	FBgn0034543															X	2.21338	mit	1	2.21338
Ripα	RPA-interacting protein α	FBgn0032189															X	2.21301	mit	1	2.21301
nom	CG8145	FBgn0037617															X	2.21215	mit	1	2.21215
Aldh-III	Aldehyde dehydrogenase type III	FBgn0010548	Foxo target (Alic 2011)											CC2			X	2.2118	mit	1	2.2118
CG14270	CG14270	FBgn0029665															X	2.21053	mit	1	2.21053
TyrRS-m	Tyrosyl-tRNA synthetase, mitochondrial	FBgn0035064															X	2.21025	mit	1	2.21025
PpV	Protein phosphatase V	FBgn0003139															X	2.2089	mit	1	2.2089
pds5	precocious dissociation of sisters 5	FBgn0260012	Releasin complex, enables sister chromatid separation at mitosis by removing the cohesin ring complex from chromosomes.														X	2.20869	mit	1	2.20869
spag	spaghetti	FBgn0015544															X	2.20788	mit	1	2.20788
Usp10	CG32479	FBgn0052479															X	2.20461	mit	1	2.20461
psidin	phagocyte signaling impaired	FBgn0243511															X	2.20418	mit	1	2.20418
Nup43	Nucleoporin 43kD	FBgn0038609															X	2.20195	mit	1	2.20195
CG11586	CG11586	FBgn0035520															X	2.20178	mit	1	2.20178
CycK	Cyclin K	FBgn0025674															X	2.20171	mit	1	2.20171
CG8038	CG8038	FBgn0035831															X	2.20104	mit	1	2.20104
CG17333	CG17333	FBgn0030239	Cytoplasm, Soluble. 6-Phosphogluconolactonase. Pentose-phosphate shunt, oxidative branch.														X	2.20083	mit	1	2.20083
gro	groucho	FBgn0001139												PH1			X	2.19983	mit	1	2.19983
CG31142	CG31142	FBgn0047114															X	2.19964	mit	1	2.19964
Fip1	CG1078	FBgn0037255															X	2.19659	mit	1	2.19659
Bet5	BET5 ortholog (S. cerevisiae)	FBgn0260860															X	2.19642	mit	1	2.19642
PKD	Protein Kinase D	FBgn0038603	Mutant sensitive to Metarhizium (Lu-2015). PKC family Ca[2+]/calmodulin-dependent S/T protein kinase. Regulates actin-dynamics														X	2.19625	mit	1	2.19625
CG11781	CG11781	FBgn0039259					PM12										X	2.19588	mit	1	2.19588
jumu	jumeau	FBgn0015396	Fork head domain transcription factor. Required for hemocyte differentiation and phagocytosis (Hao-2018).	prolif	2.19536	43.2											X		mit	1	2.19536
CG15211	CG15211	FBgn0030234	Uncharacterized protein.	prolif													X	2.19532	mit	1	2.19532
CG10333	CG10333	FBgn0032690															X	2.19326	mit	1	2.19326
CG31224	CG31224	FBgn0051224															X	2.19127	mit	1	2.19127
CG13014	CG13014	FBgn0030759															X	2.18915	mit	1	2.18915
TrpRS	Tryptophanyl-tRNA synthetase	FBgn0010803															X	2.18708	mit	1	2.18708
CG6567	CG6567	FBgn0037842															X	2.18588	mit	1	2.18588
SCCRO4	CG6597	FBgn0036967															X	2.18493	mit	1	2.18493
CG14985	CG14985	FBgn0035482															X	2.18353	mit	1	2.18353
CG7872	CG7872	FBgn0030658															X	2.18336	mit	1	2.18336
EndoG	Endonuclease G	FBgn0033690															X	2.18335	mit	1	2.18335
Tsp96F	Tetraspanin 96F	FBgn0027865	Tetraspanin. Tetraspanin-enriched microdomains. Cell surface receptor signaling.											PM4			X	2.18313	mit	1	2.18313
CG9391	CG9391	FBgn0037063	PtdInsP and InsP phosphatase.				LM2										X	2.18278	mit	1	2.18278
CG12096	CG12096	FBgn0030457															X	2.18087	mit	1	2.18087
l(2)dtl	lethal-(2)-denticleless	FBgn0013548															X	2.18029	mit	1	2.18029
Ssl1	Suppressor of Stem-Loop mutation ortholog (S. cerevisiae)	FBgn0037202	Transcription factor II H (TFIIH) core complex. Required for promoter DNA opening and nucleotide excision repair.														X	2.17627	mit	1	2.17627
vls	valois	FBgn0003978															X	2.1761	mit	1	2.1761
mRpL55	mitochondrial ribosomal protein L55	FBgn0038678															X	2.17558	mit	1	2.17558
GIIIspla2	CG1583	FBgn0030013															X	2.17518	mit	1	2.17518
CG9393	CG9393	FBgn0037710															X	2.17476	mit	1	2.17476
mRpS18C	mitochondrial ribosomal protein S18C	FBgn0039765															X	2.17199	mit	1	2.17199
CG8003	CG8003	FBgn0036096															X	2.17148	mit	1	2.17148
CG9107	CG9107	FBgn0031764															X	2.169	mit	1	2.169
CG10139	CG10139	FBgn0033951															X	2.16778	mit	1	2.16778
CG7488	CG7488	FBgn0038106															X	2.16432	mit	1	2.16432
mars	mars	FBgn0033845	Microtubule-associated protein, required for mitotic spindle attachment to the centrosome.	CC													X	2.16406	mit	1	2.16406
CG8490	CG8490	FBgn0033715															X	2.16161	mit	1	2.16161
CG10195	CG10195	FBgn0032787															X	2.16019	mit	1	2.16019
Orc1	Origin recognition complex subunit 1	FBgn0286788	Initiation of DNA replication.														X	2.15782	mit	1	2.15782
mRpL11	mitochondrial ribosomal protein L11	FBgn0038234															X	2.1574	mit	1	2.1574
myo	myoglianin	FBgn0026199	Cystine-knot cytokine. N terminal Dpp-like. TGF-beta-related. Expressed primarily in muscle and glia cells.														X	2.15556	mit	1	2.15556
AhcyL1	Adenosylhomocysteinase like 1	FBgn0035371	Inactive enzyme homolog. Metabolic reprogramming of H3K4 methylation. Suppresses Ahcy, which catalyzes the hydrolysis of the methyl donor S-Adenosylhomocysteine.														X	2.15346	mit	1	2.15346
CG2991	CG2991	FBgn0031474															X	2.15277	mit	1	2.15277
Tailor	CG1091	FBgn0037470															X	2.15205	mit	1	2.15205
CSN4	COP9 complex homolog subunit 4	FBgn0027054															X	2.15165	mit	1	2.15165
CG14511	CG14511	FBgn0039641															X	2.15133	mit	1	2.15133
Col4a1	Collagen type IV	FBgn0000299	Subunit of Collagen IV and a major component of basement membranes.	prolif	2.15117	93.2	PM9				PLASM1			PM1			PL2		mit	1	2.15117
CG2218	CG2218	FBgn0039767															X	2.15044	mit	1	2.15044
CG7483	CG7483	FBgn0037573															X	2.14683	mit	1	2.14683
Dhfr	Dihydrofolate reductase	FBgn0004087															X	2.14606	mit	1	2.14606
Rtf1	CG10955	FBgn0034722															X	2.14351	mit	1	2.14351
CG16812	CG16812	FBgn0032488															X	2.14315	mit	1	2.14315
mahe	maheshvara	FBgn0029979	ATP-dependent RNA helicase. Regulation of Notch signaling.														X	2.14197	mit	1	2.14197
CG7154	CG7154	FBgn0031947															X	2.14102	mit	1	2.14102
Pcl	Polycomblike	FBgn0003044	Repressive complex assembly. H3-K27 trimethylation in Polycomb target genes. Mutant sensitive to Beauveria infection (Jin 2008).														X	2.1406	mit	1	2.1406
mRpL21	mitochondrial ribosomal protein L21	FBgn0036853															X	2.13867	mit	1	2.13867
Fsn	CG4643	FBgn0043010															X	2.13726	mit	1	2.13726
CG5746	CG5746	FBgn0039186															X	2.13481	mit	1	2.13481
PTPMT1	Protein tyrosine phosphatase, mitochondrial 1	FBgn0039111	PI(5)P phosphatase. Biosynthesis of cardiolipin in mitochondria.														X	2.13403	mit	1	2.13403
CG4603	CG4603	FBgn0035593															X	2.1337	mit	1	2.1337
Blos4	Biogenesis of lysosome-related organelles complex 1, subunit 4	FBgn0036105															X	2.13291	mit	1	2.13291
Nup98-96	Nucleoporin 98-96kD	FBgn0039120															X	2.1321	mit	1	2.1321
ECSIT	CG10610	FBgn0028436															X	2.13037	mit	1	2.13037
wap	wings apart	FBgn0266848	Growth, viability, muscle development, wing venation. Interacts with ds. Regulates growth via the Hippo pathway.														X	2.12977	mit	1	2.12977
mRpS21	mitochondrial ribosomal protein S21	FBgn0044511					PM12										X	2.12965	mit	1	2.12965
CG8009	CG8009	FBgn0036090															X	2.12879	mit	1	2.12879
mRpS17	mitochondrial ribosomal protein S17	FBgn0034986															X	2.12827	mit	1	2.12827
Hacd2	3-hydroxyacyl-CoA dehydratase 2	FBgn0032524	Fatty acid elongation; sphingolipid biosynthesis; and very long-chain fatty acid biosynthesis.														X	2.12815	mit	1	2.12815
cN-IIIB	cytosolic 5'-nucleotidase IIIB	FBgn0034988															X	2.12601	mit	1	2.12601
CG2199	CG2199	FBgn0035213															X	2.12577	mit	1	2.12577
Mtor	Megator	FBgn0013756															X	2.12463	mit	1	2.12463
CG32576	CG32576	FBgn0052576															X	2.12352	mit	1	2.12352
SerRS-m	Seryl-tRNA synthetase	FBgn0021750															X	2.1235	mit	1	2.1235
Orc5	Origin recognition complex subunit 5	FBgn0015271		prolif													X	2.12346	mit	1	2.12346
mRpL32	mitochondrial ribosomal protein L32	FBgn0039835															X	2.12333	mit	1	2.12333
CG9804	CG9804	FBgn0037251															X	2.1233	mit	1	2.1233
CG3038	CG3038	FBgn0040373	N-acetyllactosaminide beta-1,3-N-acetylglucosaminyltransferase. Protein glycosylation.														X	2.12216	mit	1	2.12216
Nup50	Nucleoporin 50kD	FBgn0033264															X	2.12183	mit	1	2.12183
CG1371	CG1371	FBgn0033482															X	2.12135	mit	1	2.12135
Nmt	N-myristoyl transferase	FBgn0020392															X	2.12086	mit	1	2.12086
ZnT49B	Zinc transporter 49B	FBgn0033762															X	2.11931	mit	1	2.11931
YME1L	CG3499	FBgn0034792															X	2.11869	mit	1	2.11869
sip3	septin interacting protein 3	FBgn0039875	ER membrane ubiquitin ligase. Degradation of misfolded peptides.														X	2.11652	mit	1	2.11652
CG2658	CG2658	FBgn0024992															X	2.11616	mit	1	2.11616
CycY	Cyclin Y	FBgn0032378					LM2										X	2.11435	mit	1	2.11435
CG9581	CG9581	FBgn0031093															X	2.11427	mit	1	2.11427
Bre1	CG10542	FBgn0086694															X	2.1121	mit	1	2.1121
mbo	members only	FBgn0026207															X	2.11169	mit	1	2.11169
O-fut2	O-fucosyltransferase 2	FBgn0027791	Peptide-O-fucosyltransferase. O-linked glycosylation of proteins. O-glycan biosynthesis.														X	2.11104	mit	1	2.11104
CG8108	CG8108	FBgn0027567															X	2.11099	mit	1	2.11099
Upf3	CG11184	FBgn0034923															X	2.1101	mit	1	2.1101
fal	falten	FBgn0028380															X	2.10954	mit	1	2.10954
GAA1	Glycosylphosphatidylinositol anchor attachment 1 ortholog (H. sapiens)	FBgn0029818															X	2.10934	mit	1	2.10934
ana2	anastral spindle 2	FBgn0027513															X	2.10899	mit	1	2.10899
Bap55	Brahma associated protein 55kD	FBgn0025716															X	2.10885	mit	1	2.10885
RecQ5	RecQ5 helicase	FBgn0027375	DNA helicase. Maintains genome stability, DNA repair, DNA resolution, and RNA transcription.														X	2.10816	mit	1	2.10816
CG12179	CG12179	FBgn0025388															X	2.10785	mit	1	2.10785
Top3α	Topoisomerase 3α	FBgn0040268															X	2.10784	mit	1	2.10784
128up	upstream of RpIII128	FBgn0010339															X	2.10664	mit	1	2.10664
Usp7	Ubiquitin-specific protease 7	FBgn0030366															X	2.10549	mit	1	2.10549
thoc5	CG2980	FBgn0034939															X	2.10462	mit	1	2.10462
botv	brother of tout-velu	FBgn0027535															X	2.10461	mit	1	2.10461
l(1)10Bb	lethal (1) 10Bb	FBgn0001491															X	2.10291	mit	1	2.10291
Su(z)12	CG8013	FBgn0020887															X	2.10267	mit	1	2.10267
Amun	Amun	FBgn0030328	Uncharacterized insect protein. Development.														X	2.10197	mit	1	2.10197
PMP34	Peroxisomal Membrane Protein 34	FBgn0052250	Nucleotide transmembrane transporter														X	2.10132	mit	1	2.10132
Msh6	CG7003	FBgn0036486															X	2.09916	mit	1	2.09916
Rad60	CG4449	FBgn0039065															X	2.099	mit	1	2.099
CG8525	CG8525	FBgn0033735															X	2.09882	mit	1	2.09882
Corin	Corin	FBgn0033192	Transmembrane serine protease.Activator of peptide hormone. Similar to human atrial natriuretic peptide-converting enzyme.														X	2.09533	mit	1	2.09533
CG32795	CG32795	FBgn0040384	Human Transmembrane protein 120B-related. Serratia-sensitive when suppressed in gut (NP1 driver) (Cronin 2009).														X	2.09511	mit	1	2.09511
CG32278	CG32278	FBgn0052278															X	2.09502	mit	1	2.09502
ncm	nucampholin	FBgn0086707															X	2.09443	mit	1	2.09443
SdhA	Succinate dehydrogenase A	FBgn0261439															X	2.092	mit	1	2.092
Tango10	Transport and Golgi organization 10	FBgn0030330															X	2.09091	mit	1	2.09091
Uba2	Smt3 activating enzyme 2	FBgn0029113															X	2.09089	mit	1	2.09089
CG7137	CG7137	FBgn0034422															X	2.09075	mit	1	2.09075
CG14184	CG14184	FBgn0036932															X	2.0892	mit	1	2.0892
Surf1	Surfeit 1	FBgn0029117															X	2.08594	mit	1	2.08594
CG8460	CG8460	FBgn0031996	Stabilin-1 interacting chitolectin. Glycoside hydrolase. Carbohydrate metabolism.														X	2.08573	mit	1	2.08573
HIP	Hsc/Hsp70-interacting protein	FBgn0260484															X	2.08526	mit	1	2.08526
Itp-r83A	Inositol 1,4,5,-tris-phosphate receptor	FBgn0010051	Intracellular calcium channel, downstream of G-protein coupled receptors. Regulation of feeding behavior and response to starvation.														X	2.08453	mit	1	2.08453
CG13994	CG13994	FBgn0031772															X	2.08403	mit	1	2.08403
fs(2)ltoPP43	female sterile (2) ltoPP43	FBgn0004811															X	2.08337	mit	1	2.08337
sicily	severe impairment of CI with lengthened youth	FBgn0030352															X	2.08317	mit	1	2.08317
CG3831	CG3831	FBgn0034804	Uncharacterized insect-specific protein.														X	2.08208	mit	1	2.08208
Pp1α-96A	Protein phosphatase 1α at 96A	FBgn0003134	Ser/Thr phosphatase. Positive regulator of Wnt signaling. Knockdown is sensitive to Serratia infection (Cronin 2009). Negative regulator of JAK-STAT signaling.														X	2.08047	mit	1	2.08047
CG33695	CG33695	FBgn0052831															X	2.0804	mit	1	2.0804
CG4332	CG4332	FBgn0030456															X	2.07938	mit	1	2.07938
Fkbp39	FK506-binding protein 39kD	FBgn0013269	Peptidyl-prolyl cis-trans isomerase. Protein folding. Inhibitor of autophagy in larval fat body.	prolif	2.07904	59.1	CC1							PH2					mit	1	2.07904
Arc42	Arc42	FBgn0038742															X	2.079	mit	1	2.079
Spindly	Spindly	FBgn0031549	Regulator of dynein recruitment to kinetochores. Spindle assembly checkpoint during the cell cycle.														X	2.07845	mit	1	2.07845
Cks85A	Cyclin-dependent kinase subunit 85A	FBgn0037613															X	2.07707	mit	1	2.07707
e(y)1	enhancer of yellow 1	FBgn0000617															X	2.07676	mit	1	2.07676
CG8728	CG8728	FBgn0033235															X	2.07641	mit	1	2.07641
CG9577	CG9577	FBgn0031092	Enoyl-CoA hydratase/isomerase. Fatty acid beta-oxidation.														X	2.07518	mit	1	2.07518
CG2063	CG2063	FBgn0033400															X	2.07461	mit	1	2.07461
Art1	Arginine methyltransferase 1	FBgn0037834															X	2.07446	mit	1	2.07446
Arl4	ADP ribosylation factor-like 4	FBgn0039889															X	2.07273	mit	1	2.07273
SmD1	Small ribonucleoprotein particle protein SmD1	FBgn0261933															X	2.06889	mit	1	2.06889
CG14036	CG14036	FBgn0031677															X	2.06878	mit	1	2.06878
CG8311	CG8311	FBgn0034141															X	2.06866	mit	1	2.06866
holn1	hole-in-one	FBgn0032250															X	2.06864	mit	1	2.06864
CG4502	CG4502	FBgn0031896															X	2.06807	mit	1	2.06807
Vps26	Vacuolar protein sorting 26	FBgn0014411															X	2.0679	mit	1	2.0679
CG32857		FBgn0052857															X	2.06737	mit	1	2.06737
cnn	centrosomin	FBgn0013765	Mitotic centrosome component. Mitotic spindle, the actin cytoskeleton and centriole replication.	robo2			LM2										X	2.06555	mit	1	2.06555
Desat1	Desaturase 1	FBgn0086687															X	2.06515	mit	1	2.06515
SdhB	Succinate dehydrogenase B	FBgn0014028															X	2.06476	mit	1	2.06476
CG7220	CG7220	FBgn0033544	Ubiquitin-conjugating (E2) enzyme. Proteasome-mediated ubiquitin-dependent protein catabolism.														X	2.06376	mit	1	2.06376
Ccdc58	CG15881	FBgn0036909															X	2.06352	mit	1	2.06352
CG11777	CG11777	FBgn0033527															X	2.06244	mit	1	2.06244
Clp	Clipper	FBgn0015621															X	2.06222	mit	1	2.06222
RpII33	RNA polymerase II 33kD subunit	FBgn0026373															X	2.06217	mit	1	2.06217
Ref1	RNA and export factor binding protein 1	FBgn0010774															X	2.06197	mit	1	2.06197
Sesn	Sestrin	FBgn0034897	Stress-inducible, suppresses reactive oxygen, inhibits TORC1 signaling.	robo2			PM12										X	2.06083	mit	1	2.06083
CG4747	CG4747	FBgn0043456															X	2.06067	mit	1	2.06067
CG6512	CG6512	FBgn0036702					PM5										X	2.06027	mit	1	2.06027
CG7382	CG7382	FBgn0031708															X	2.05923	mit	1	2.05923
CG3902	CG3902	FBgn0036824	Acyl-CoA dehydrogenase. Mitochondrial fatty acid beta-oxidation.	Inos													X	2.05716	mit	1	2.05716
CG32856	CG32856	FBgn0052856															X	2.05644	mit	1	2.05644
CG42724	CG42724	FBgn0261641												PH6			X	2.05583	mit	1	2.05583
Nca	Neurocalcin	FBgn0013303															X	2.05243	mit	1	2.05243
Pgam5	Phosphoglycerate mutase 5	FBgn0023517															X	2.05174	mit	1	2.05174
mRpS33	mitochondrial ribosomal protein S33	FBgn0038426															X	2.05015	mit	1	2.05015
Uck	CG6364	FBgn0263398															X	2.04796	mit	1	2.04796
CG7182	CG7182	FBgn0035878															X	2.04649	mit	1	2.04649
CG6094	CG6094	FBgn0032261															X	2.04467	mit	1	2.04467
CG2656	CG2656	FBgn0037478															X	2.04417	mit	1	2.04417
SMC3	Structural maintenance of chromosomes 3	FBgn0015615	Mutant sensitive to Metarhizium (Lu-2015).														X	2.0432	mit	1	2.0432
mei-P26	CG12218	FBgn0026206					PM10										X	2.04155	mit	1	2.04155
Dis3l2	CG16940	FBgn0035111															X	2.04066	mit	1	2.04066
retm	real-time	FBgn0031814															X	2.03841	mit	1	2.03841
CG5412	CG5412	FBgn0038806															X	2.03831	mit	1	2.03831
Pex12	Peroxin 12	FBgn0031282															X	2.03827	mit	1	2.03827
Gp210	Glycoprotein 210 kDa	FBgn0266580															X	2.03742	mit	1	2.03742
CG13599	CG13599	FBgn0039128	Mad1/Cdc20-bound-Mad2 binding protein. Regulation of exit from mitosis.														X	2.03741	mit	1	2.03741
adp	adipose	FBgn0000057															X	2.03703	mit	1	2.03703
galla-2	CG7949	FBgn0036107															X	2.03679	mit	1	2.03679
εCOP	Coat Protein (coatomer) ε	FBgn0027496	ER - Golgi vesicle-mediated transport.				LM2										X	2.03508	mit	1	2.03508
tws	twins	FBgn0004889	Protein phosphatase 2A (PP2A) subunit. Many functions; wg, hedgehog signaling.														X	2.03371	mit	1	2.03371
Tgi	Tondu-domain-containing Growth Inhibitor	FBgn0036373															X	2.03361	mit	1	2.03361
Ubc4	Ubiquitin conjugating enzyme 4	FBgn0015321															X	2.03341	mit	1	2.03341
Cchl	Cytochrome c heme lyase	FBgn0038925															X	2.03252	mit	1	2.03252
CG42359	CG42359	FBgn0259705	Vacuolar ATPase assembly integral membrane protein Vma21. Affects Imd signaling(?) (Cronin 2009).														X	2.03235	mit	1	2.03235
l(2)35Be	lethal (2) 35Be	FBgn0261881															X	2.03204	mit	1	2.03204
me31B	maternal expression at 31B	FBgn0004419					PM12										X	2.03084	mit	1	2.03084
CG14043	CG14043	FBgn0031659															X	2.03025	mit	1	2.03025
CG9590	CG9590	FBgn0038360															X	2.02968	mit	1	2.02968
asrij	asrij	FBgn0034793															X	2.02809	mit	1	2.02809
atms	antimeros	FBgn0010750															X	2.0279	mit	1	2.0279
Rpe	Ribulose-5-phosphate-3-epimerase	FBgn0050499	Inverts stereochemical arrangement at chiral centers in carbohydrates.														X	2.02666	mit	1	2.02666
Larp7	La related protein 7	FBgn0260771															X	2.02471	mit	1	2.02471
pcs	parcas	FBgn0033988												PH1			X	2.02426	mit	1	2.02426
CG11885	CG11885	FBgn0031253															X	2.02242	mit	1	2.02242
mRpL46	mitochondrial ribosomal protein L46	FBgn0035272															X	2.02177	mit	1	2.02177
Nup37	Nucleoporin 37kD	FBgn0039301															X	2.02015	mit	1	2.02015
Tpc1	Thiamine pyrophosphate carrier protein 1	FBgn0037852															X	2.0198	mit	1	2.0198
Gpdh1	Glycerol-3-phosphate dehydrogenase 1	FBgn0001128	Major link between carbohydrate metabolism and lipid metabolism. Also major contributor of electrons to the electron transport chain in mitochondria.														X	2.01757	mit	1	2.01757
Rheb	Ras homolog enriched in brain ortholog (H. sapiens)	FBgn0041191															X	2.01619	mit	1	2.01619
CG9272	CG9272	FBgn0032907															X	2.01616	mit	1	2.01616
Ubc2	Ubiquitin conjugating enzyme 2	FBgn0015320															X	2.01454	mit	1	2.01454
CG9018	CG9018	FBgn0035318															X	2.01451	mit	1	2.01451
CG13319	CG13319	FBgn0033781															X	2.01409	mit	1	2.01409
mRpL2	mitochondrial ribosomal protein L2	FBgn0036135															X	2.01318	mit	1	2.01318
spn-A	spindle A	FBgn0003479															X	2.01298	mit	1	2.01298
pita	CG3941	FBgn0034878															X	2.01213	mit	1	2.01213
MTPAP	CG11418	FBgn0024360															X	2.01194	mit	1	2.01194
mRpL41	mitochondrial ribosomal protein L41	FBgn0034001															X	2.01186	mit	1	2.01186
CG8230	CG8230	FBgn0027607															X	2.0116	mit	1	2.0116
exd	extradenticle	FBgn0000611															X	2.0104	mit	1	2.0104
qkr58E-2	quaking related 58E-2	FBgn0022985															X	2.00752	mit	1	2.00752
CG7185	CG7185	FBgn0035872															X	2.00619	mit	1	2.00619
Etf-QO	Electron transfer flavoprotein-ubiquinone oxidoreductase	FBgn0286783	Fuels electrons from fatty acid oxidation by matrix dehydrogenases into the respiratory chain.	Rel													X	2.00535	mit	1	2.00535
CG16935	CG16935	FBgn0033883															X	2.00488	mit	1	2.00488
snRNP-U1-C	small ribonucleoprotein particle U1 subunit C	FBgn0261792															X	2.00475	mit	1	2.00475
CG30373	CG30373	FBgn0050373															X	2.00427	mit	1	2.00427
pont	pontin	FBgn0040078															X	2.00275	mit	1	2.00275
Trs31	TRAPP subunit 31 ortholog (S. cerevisiae)	FBgn0266723															X	2.00121	mit	1	2.00121
mRpL38	mitochondrial ribosomal protein L38	FBgn0030552															X	2.0005	mit	1	2.0005
Taldo	Transaldolase	FBgn0023477	Pentose-phosphate pathway.	prolif	1.91935	61.4													mit	1	1.91935
SNRPG	Small ribonucleoprotein particle protein SmG	FBgn0261791	Component of pre-mRNA processing U snRNPs.	prolif	1.85234	68.2	PM12												mit	1	1.85234
CG42806	CG42806	FBgn0261975		prolif	1.84277	27.3													mit	1	1.84277
Nepl19	Neprilysin-like 19	FBgn0039612	M13 family metalloprotease-like, lacking conserved motifs important for catalytic activity. Probably inactive peptidase.	prolif	1.84208	34.1	PM12										PL2		mit	1	1.84208
eas	easily shocked	FBgn0000536	Choline kinase; ethanolamine kinase. Phosphatidylethanolamine biosynthesis.	prolif	1.84106	38.6													mit	1	1.84106
Ran	CG1404	FBgn0020255		prolif	1.7768	90.9													mit	1	1.7768
CG9485	CG9485	FBgn0034618	4-alpha-glucanotransferase and amylo-alpha-1,6-glucosidase. Glycogen catabolism.	prolif	1.76816	34.1													mit	1	1.76816
Nap1	Nucleosome assembly protein 1	FBgn0015268		prolif	1.76497	90.9	CC1							PH2					mit	1	1.76497
Pgk	Phosphoglycerate kinase	FBgn0250906	Muscle cell cellular homeostasis; myoblast fusion; and somatic muscle development.	prolif	1.75276	61.4	PM10										PSC		mit	1	1.75276
Eglp4	Entomoglyceroporin 4	FBgn0034885	Aquaglyceroporin (AQGP). Membrane protein with a pore, permeable to water and other small uncharged molecules (particularly glycerol).	prolif	1.74226	27.3													mit	1	1.74226
REG	Proteasome regulator γ	FBgn0029133	Endopeptidase regulator. Regulation of the mitotic G1/S transition and proteasomal protein catabolism.	prolif	1.73143	31.8													mit	1	1.73143
TM4SF	Transmembrane 4 superfamily	FBgn0020372	Tetraspanin. Tetraspanin-enriched microdomains. Cell surface receptor signaling.	prolif	1.71902	11.4	PM10												mit	1	1.71902
CG12173	CG12173	FBgn0037305	Acireductone synthase. L-methionine salvage from methylthioadenosine.	prolif	1.71862	38.6													mit	1	1.71862
Pgant6	polypeptide GalNAc transferase 6	FBgn0035375	O-linked oligosaccharide biosynthesis. Transfer of N-acetyl-D-galactosamine residues to previously glycosylated peptides.	prolif	1.71338	40.9											X		mit	1	1.71338
CG4038	CG4038	FBgn0011824		prolif	1.70684	50	CC1				PLASM2			PH2					mit	1	1.70684
CG15695	CG15695	FBgn0038832	DUF229, Protein of unknown function, large insect family. Sulfatase-like domain.	prolif	1.66424	22.7											X		mit	1	1.66424
ed	echinoid	FBgn0000547	Cell adhesion molecule. Adherens junctions. Cell adhesion/recognition. Egfr, Notch and Hippo signaling.	prolif	1.65417	36.4				Pri				PH1					mit	1	1.65417
NimB2	Nimrod B2	FBgn0028543	Exported Nimrod protein. Function unknown.	prolif	1.64948	27.3								PH2			PL2		mit	1	1.64948
RnrS	Ribonucleoside diphosphate reductase small subunit	FBgn0011704	DNA synthesis; biosynthesis of deoxyribonucleotides from ribonucleotides.	prolif	1.64558	20.5											X		mit	1	1.64558
CG8891	CG8891	FBgn0031663		prolif	1.61902	34.1													mit	1	1.61902
CG15093	CG15093	FBgn0034390	Other CH-OH oxidoreductase.	prolif	1.58692	20.5					CC								mit	1	1.58692
CG3224	CG3224	FBgn0029885		prolif	1.57365	27.3													mit	1	1.57365
CG9143	CG9143	FBgn0034496		prolif	1.54842	25													mit	1	1.54842
CG14701	CG14701	FBgn0037883		prolif	1.54663	22.7													mit	1	1.54663
CG5273	CG5273	FBgn0040382		prolif	1.52091	20.5													mit	1	1.52091
FucTB	CG4435	FBgn0032117		prolif	1.50274	20.5											X		mit	1	1.50274
RpI135	RNA polymerase I 135kD subunit	FBgn0003278		prolif	1.50244	18.2													mit	1	1.50244
CG9114	CG9114	FBgn0030628		prolif	1.49917	22.7													mit	1	1.49917
RPA2	Replication protein A2	FBgn0032906		prolif	1.48744	18.2											X		mit	1	1.48744
Ugt35a	UDP-glycosyltransferase 35a	FBgn0026315		prolif	1.47644	15.9					CC								mit	1	1.47644
magu	CG2264	FBgn0262169		prolif	1.47134	15.9													mit	1	1.47134
Ser	Serrate	FBgn0004197	Notch ligand	prolif	1.4699	13.6											X		mit	1	1.4699
CG7149	CG7149	FBgn0031948	Choline/ethanolamine phosphotransferase. Phosphatidylethanolamine biosynthesis.	prolif	1.46092	25													mit	1	1.46092
NHP2	NHP2	FBgn0029148	50S ribosomal protein L30e-like	prolif	1.45649	22.7	PM6				PLASM2			PH2			PP		mit	1	1.45649
CG17119	CG17119	FBgn0039045	Lysosomal cystine transporter. Cystine transmembrane transport.	prolif	1.43548	18.2													mit	1	1.43548
neb	nebbish	FBgn0004374	Forkhead-associated (FHA) domain, mitotic/meiotic cell cycle.	prolif	1.43364	13.6													mit	1	1.43364
CG4829	CG4829	FBgn0030796	Gamma-glutamyltransferase. Glutathione metabolism.	prolif	1.42615	15.9					PLASM1						PL2		mit	1	1.42615
CG10444	CG10444	FBgn0034494	Solute carrier family 5 (SLC5) member, sodium-dependent glucose transporter.	prolif	1.40032	13.6													mit	1	1.40032
CG5359	CG5359	FBgn0037773		prolif	1.39397	18.2													mit	1	1.39397
CG14253	CG14253	FBgn0039467	Uncharacterized. Odorant/peptide hormone receptor??	prolif	1.36767	13.6	LM2							LM2					mit	1	1.36767

## Sheet: Fat body-like
Fat body-like clusters				scRNAseq: fold enrichment ("FC") and % representation
Characteristic genes				Cattenoz			Tattikota			Fu	Leitão			Cho			Girard		Summary	Mean
Symbol	Name	FlyBase ID	Description	Clust	FC	%	Clust	FC	%	Clust	Clust	FC	%	Clust	FC	%	Clust	Fold	Class	n	FC
Obp99b	Odorant-binding protein 99b	FBgn0039685	Secreted, non-sensory, odorant binding protein. Fat body. Target of Foxo and Aop (Alic-2014).	Lsp	12.2147	88.8				Lsp									LSP	2	12.2147
Lsp2	Larval serum protein 2	FBgn0002565	Storage protein, Hemocyanin/hexamerin. +/-Fat body-specific.	Lsp	5.25043	65.8				Lsp									LSP	2	5.25043
Obp99c	Odorant-binding protein 99c	FBgn0039682	Sensory perception of chemical stimulus. +/-Fat body-specific. Induced by Beauveria infection, suppressed by bacteria (Levy 2004).	Lsp	1.82236	21.9				Lsp									LSP	2	1.82236
apolpp	apolipophorin	FBgn0087002	Assembles the major hemolymph lipoprotein, lipophorin. Ubiquitous.	Lsp	1.46239	21.4				Lsp									LSP	2	1.46239
TotA	Turandot A	FBgn0028396	Turandot. Probably fat body-specific.	Lsp	1.41812	11.7				Lsp									LSP	2	1.41812
Lsp1β	Larval serum protein 1 β	FBgn0002563	Storage protein, Hemocyanin/hexamerin. Fat body.	Lsp	12.6696	93.4													lsp	1	12.6696
Fbp2	Fat body protein 2	FBgn0000640	Fat body protein 2. Alcohol dehydrogenase-related. Sulfur-storage protein?	Lsp	11.4109	92.3													lsp	1	11.4109
CG34166	CG34166	FBgn0085195	Drosophila-specific exported low-complexity G,Q-rich peptide. +/-Fat body-specific.	Lsp	11.0533	79.6													lsp	1	11.0533
Lsp1α	Larval serum protein 1 α	FBgn0002562	Storage protein, Hemocyanin/hexamerin. Fat body.	Lsp	6.39887	75													lsp	1	6.39887
Fbp1	Fat body protein 1	FBgn0000639	Fat body protein 1. Storage protein, Hemocyanin/hexamerin. Fat body-specific.	Lsp	5.25796	66.8													lsp	1	5.25796
Lsp1γ	Larval serum protein 1 γ	FBgn0002564	Storage protein, Hemocyanin/hexamerin. +/-Fat body-specific.	Lsp	4.12933	58.7													lsp	1	4.12933
CG34291	CG34291	FBgn0085320	Uncharacterized diptera-specific peptide. Fat body.	Lsp	2.02532	26.5													lsp	1	2.02532
CG16704	CG16704	FBgn0031558	Kunitz-type serine protease inhibitor. +/-Fat body-specific.	Lsp	1.8548	23													lsp	1	1.8548
CG15369	CG15369	FBgn0030105	Cystatine-type endopeptidase inhibitor. Fat body-specific.	Lsp	1.64607	18.4													lsp	1	1.64607
CG2233	CG2233	FBgn0029990	Uncharacterized insect protein.	Lsp	1.61703	19.4													lsp	1	1.61703
CG5773	CG5773	FBgn0034290	Uncharacterized Drosophila-specific protein. +/-Fat body-specific.	Lsp	1.48911	15.8													lsp	1	1.48911
CG42587	CG42587	FBgn0260955	Uncharacterized Drosophila-specific P-rich peptide. Fat body-specific.	Lsp	1.47191	13.8													lsp	1	1.47191
CG8369	CG8369	FBgn0040532	Wing disc dorsal/ventral boundary formation. Fat body.	Lsp	1.45199	12.8													lsp	1	1.45199
CG12116	CG12116	FBgn0030041	Sepiapterin reductase. Tetrahydrobiopterin biosynthesis. Fat body.	Lsp	1.38799	20.4													lsp	1	1.38799
Npc2g	Niemann-Pick type C-2g	FBgn0039800	ML, Domain involved in innate immunity and lipid metabolism; promoting protein [Bombyx mori], a protein of the insect fat body that enhances the rate of cell Infection by baculoviruses (CG11314 gene symbol:CG11314 FBgn0039800 )	Lsp						Lsp							PL2		lsp	1	–
Vago	Vago	FBgn0030262	Single von Willebrand type C factor domain. Induced in fat body by viral infection. Its induction depends on Dcr-2, and it functions to restrict Drosophila C virus replication in the fat body of adult flies.							Lsp									lsp	1	–
Thor	Thor	FBgn0261560	4E-binding protein (4E-BP) family, controls initiation of translation. Immune response.				LM2			Lsp	PM4								lsp	1	–
