# Supplementary material for: Hematopoietic plasticity mapped in Drosophila and other insects
Source: eLife. 2022 Aug 3;11:e78906. doi: 10.7554/eLife.78906 (PMC9348853; doi:10.7554/eLife.78906)
Supplement: Figure 1—source data 2. — Significantly enriched GO terms in differentially expressed genes in lamellocyte, crystal cell, and plasmatocyte clusters in at least two of the published studies. [file elife-78906-fig1-data2.xlsx]

## Sheet: Lamellocytes
Ontology Term Identifier	Item (matches)	p-value	Genes
GO:0007010	cytoskeleton organization (29)	2.32728e-07	FBgn0000253,FBgn0001105,FBgn0001941,FBgn0003884,FBgn0003886,FBgn0003888,FBgn0003890,FBgn0004456,FBgn0004657,FBgn0010397,FBgn0013733,FBgn0014011,FBgn0014141,FBgn0024238,FBgn0026374,FBgn0027066,FBgn0029903,FBgn0033504,FBgn0034894,FBgn0038206,FBgn0040299,FBgn0051363,FBgn0052528,FBgn0086347,FBgn0259228,FBgn0260442,FBgn0264693,FBgn0265991,FBgn0267795
GO:0030029	actin filament-based process (21)	2.69687e-07	FBgn0000253,FBgn0001105,FBgn0004456,FBgn0004657,FBgn0010397,FBgn0013733,FBgn0014011,FBgn0014141,FBgn0024238,FBgn0026374,FBgn0029903,FBgn0033504,FBgn0038206,FBgn0040299,FBgn0052528,FBgn0086347,FBgn0259228,FBgn0260442,FBgn0261988,FBgn0265991,FBgn0267795
GO:0097435	supramolecular fiber organization (19)	1.4417e-06	FBgn0001105,FBgn0004456,FBgn0004657,FBgn0010397,FBgn0013733,FBgn0014011,FBgn0014141,FBgn0024238,FBgn0026374,FBgn0029903,FBgn0033504,FBgn0038206,FBgn0040299,FBgn0051363,FBgn0086347,FBgn0259228,FBgn0260442,FBgn0264693,FBgn0265991
GO:0030036	actin cytoskeleton organization (19)	6.74044e-06	FBgn0001105,FBgn0004456,FBgn0004657,FBgn0010397,FBgn0013733,FBgn0014011,FBgn0014141,FBgn0024238,FBgn0026374,FBgn0029903,FBgn0033504,FBgn0038206,FBgn0040299,FBgn0052528,FBgn0086347,FBgn0259228,FBgn0260442,FBgn0265991,FBgn0267795
GO:0033627	cell adhesion mediated by integrin (7)	4.85892e-05	FBgn0004456,FBgn0004657,FBgn0010395,FBgn0034005,FBgn0260442,FBgn0261261,FBgn0263118
GO:0048731	system development (43)	0.00015874	FBgn0000083,FBgn0000253,FBgn0001105,FBgn0003205,FBgn0003888,FBgn0004456,FBgn0004636,FBgn0004657,FBgn0010395,FBgn0010397,FBgn0012051,FBgn0013733,FBgn0014011,FBgn0014141,FBgn0016059,FBgn0020251,FBgn0027066,FBgn0029903,FBgn0031213,FBgn0032499,FBgn0033032,FBgn0033033,FBgn0033504,FBgn0034894,FBgn0035498,FBgn0035708,FBgn0036752,FBgn0038206,FBgn0038890,FBgn0040299,FBgn0052528,FBgn0086347,FBgn0259228,FBg…
GO:0061061	muscle structure development (14)	0.000460604	FBgn0003205,FBgn0004456,FBgn0004657,FBgn0010397,FBgn0012051,FBgn0014011,FBgn0014141,FBgn0033504,FBgn0052528,FBgn0259228,FBgn0260442,FBgn0263118,FBgn0264693,FBgn0265991
GO:0031589	cell-substrate adhesion (7)	0.000501453	FBgn0004456,FBgn0004657,FBgn0010395,FBgn0034005,FBgn0035498,FBgn0052528,FBgn0265991
GO:0016203	muscle attachment (7)	0.000934116	FBgn0004456,FBgn0004657,FBgn0014011,FBgn0033504,FBgn0052528,FBgn0259228,FBgn0260442
GO:0060538	skeletal muscle organ development (7)	0.000934116	FBgn0004456,FBgn0004657,FBgn0014011,FBgn0033504,FBgn0052528,FBgn0259228,FBgn0260442
GO:0007155	cell adhesion (14)	0.000974589	FBgn0001105,FBgn0004397,FBgn0004456,FBgn0004636,FBgn0004657,FBgn0010395,FBgn0031150,FBgn0034005,FBgn0035498,FBgn0052528,FBgn0260442,FBgn0261261,FBgn0263118,FBgn0265991
GO:0007160	cell-matrix adhesion (6)	0.00132163	FBgn0004456,FBgn0004657,FBgn0010395,FBgn0034005,FBgn0035498,FBgn0265991
GO:0022610	biological adhesion (14)	0.00150677	FBgn0001105,FBgn0004397,FBgn0004456,FBgn0004636,FBgn0004657,FBgn0010395,FBgn0031150,FBgn0034005,FBgn0035498,FBgn0052528,FBgn0260442,FBgn0261261,FBgn0263118,FBgn0265991
GO:0006928	movement of cell or subcellular component (25)	0.00178017	FBgn0000253,FBgn0001105,FBgn0003205,FBgn0003888,FBgn0004387,FBgn0004456,FBgn0004636,FBgn0004657,FBgn0010395,FBgn0013733,FBgn0014011,FBgn0014141,FBgn0016059,FBgn0020251,FBgn0029903,FBgn0038206,FBgn0040299,FBgn0041087,FBgn0086347,FBgn0260442,FBgn0261988,FBgn0263930,FBgn0264693,FBgn0267487,FBgn0267795
GO:0048856	anatomical structure development (55)	0.00180046	FBgn0000042,FBgn0000083,FBgn0000253,FBgn0001105,FBgn0003205,FBgn0003886,FBgn0003888,FBgn0004456,FBgn0004636,FBgn0004657,FBgn0010395,FBgn0010397,FBgn0012051,FBgn0013733,FBgn0014011,FBgn0014141,FBgn0016059,FBgn0020251,FBgn0024238,FBgn0027066,FBgn0029903,FBgn0031213,FBgn0032499,FBgn0032731,FBgn0033032,FBgn0033033,FBgn0033448,FBgn0033504,FBgn0034005,FBgn0034219,FBgn0034894,FBgn0035498,FBgn0035623,FBg…
GO:0032502	developmental process (58)	0.00186224	FBgn0000042,FBgn0000083,FBgn0000253,FBgn0001105,FBgn0001941,FBgn0003205,FBgn0003748,FBgn0003886,FBgn0003888,FBgn0004387,FBgn0004456,FBgn0004636,FBgn0004657,FBgn0010395,FBgn0010397,FBgn0012051,FBgn0013733,FBgn0014011,FBgn0014141,FBgn0016059,FBgn0020251,FBgn0024238,FBgn0027066,FBgn0029903,FBgn0031213,FBgn0032499,FBgn0032731,FBgn0033032,FBgn0033033,FBgn0033448,FBgn0033504,FBgn0034005,FBgn0034219,FBg…
GO:0007229	integrin-mediated signaling pathway (5)	0.00204883	FBgn0004456,FBgn0004657,FBgn0010395,FBgn0034005,FBgn0035498
GO:0007015	actin filament organization (12)	0.00301165	FBgn0004456,FBgn0004657,FBgn0010397,FBgn0014011,FBgn0014141,FBgn0024238,FBgn0026374,FBgn0029903,FBgn0033504,FBgn0038206,FBgn0040299,FBgn0086347
GO:0048513	animal organ development (32)	0.00453284	FBgn0000083,FBgn0000253,FBgn0001105,FBgn0003205,FBgn0004456,FBgn0004636,FBgn0004657,FBgn0010397,FBgn0013733,FBgn0014011,FBgn0014141,FBgn0020251,FBgn0027066,FBgn0032499,FBgn0033033,FBgn0033504,FBgn0034894,FBgn0035498,FBgn0036752,FBgn0038206,FBgn0038890,FBgn0040299,FBgn0052528,FBgn0086347,FBgn0259228,FBgn0260442,FBgn0261988,FBgn0263118,FBgn0263930,FBgn0264693,FBgn0265042,FBgn0267795
GO:0051493	regulation of cytoskeleton organization (11)	0.0149161	FBgn0001105,FBgn0004657,FBgn0010397,FBgn0013733,FBgn0014011,FBgn0014141,FBgn0026374,FBgn0027066,FBgn0034894,FBgn0038206,FBgn0051363
GO:0007275	multicellular organism development (48)	0.0152264	FBgn0000042,FBgn0000083,FBgn0000253,FBgn0001105,FBgn0003205,FBgn0003888,FBgn0004456,FBgn0004636,FBgn0004657,FBgn0010395,FBgn0010397,FBgn0012051,FBgn0013733,FBgn0014011,FBgn0014141,FBgn0016059,FBgn0020251,FBgn0024238,FBgn0027066,FBgn0029903,FBgn0031213,FBgn0032499,FBgn0033032,FBgn0033033,FBgn0033448,FBgn0033504,FBgn0034219,FBgn0034894,FBgn0035498,FBgn0035623,FBgn0035708,FBgn0036752,FBgn0038206,FBg…
GO:0000902	cell morphogenesis (19)	0.0349978	FBgn0000253,FBgn0003205,FBgn0003886,FBgn0003888,FBgn0004456,FBgn0004636,FBgn0004657,FBgn0013733,FBgn0014011,FBgn0014141,FBgn0016059,FBgn0029903,FBgn0033033,FBgn0039056,FBgn0052528,FBgn0261988,FBgn0263930,FBgn0267487,FBgn0267795
GO:0007154	cell communication (40)	0.0402644	FBgn0000253,FBgn0001105,FBgn0003205,FBgn0003218,FBgn0003660,FBgn0004456,FBgn0004636,FBgn0004657,FBgn0010395,FBgn0014011,FBgn0016059,FBgn0020251,FBgn0024150,FBgn0026374,FBgn0029095,FBgn0032422,FBgn0032499,FBgn0032897,FBgn0034005,FBgn0034219,FBgn0034894,FBgn0035498,FBgn0035499,FBgn0035623,FBgn0036752,FBgn0038206,FBgn0039747,FBgn0040206,FBgn0041087,FBgn0043070,FBgn0085390,FBgn0085421,FBgn0086370,FBg…

## Sheet: Crystal cells
Ontology Term Identifier	Item (matches)	p-value	Genes
GO:0044281	small molecule metabolic process (33)	8.4499e-08	FBgn0000064,FBgn0002719,FBgn0004647,FBgn0004654,FBgn0011770,FBgn0014930,FBgn0017558,FBgn0023129,FBgn0027621,FBgn0027843,FBgn0030029,FBgn0030467,FBgn0030653,FBgn0031682,FBgn0031717,FBgn0032482,FBgn0032726,FBgn0032727,FBgn0032820,FBgn0034179,FBgn0034999,FBgn0035529,FBgn0035679,FBgn0036298,FBgn0038984,FBgn0039051,FBgn0039052,FBgn0040070,FBgn0042094,FBgn0263593,FBgn0264815,FBgn0270926,FBgn0283680
GO:0019752	carboxylic acid metabolic process (18)	0.0011698	FBgn0000064,FBgn0002719,FBgn0004647,FBgn0004654,FBgn0011770,FBgn0023129,FBgn0027621,FBgn0030467,FBgn0030653,FBgn0031717,FBgn0032726,FBgn0032727,FBgn0034999,FBgn0038984,FBgn0039051,FBgn0039052,FBgn0263593,FBgn0270926
GO:0043436	oxoacid metabolic process (18)	0.00121665	FBgn0000064,FBgn0002719,FBgn0004647,FBgn0004654,FBgn0011770,FBgn0023129,FBgn0027621,FBgn0030467,FBgn0030653,FBgn0031717,FBgn0032726,FBgn0032727,FBgn0034999,FBgn0038984,FBgn0039051,FBgn0039052,FBgn0263593,FBgn0270926
GO:0006082	organic acid metabolic process (18)	0.00147846	FBgn0000064,FBgn0002719,FBgn0004647,FBgn0004654,FBgn0011770,FBgn0023129,FBgn0027621,FBgn0030467,FBgn0030653,FBgn0031717,FBgn0032726,FBgn0032727,FBgn0034999,FBgn0038984,FBgn0039051,FBgn0039052,FBgn0263593,FBgn0270926
GO:0042592	homeostatic process (19)	0.00860646	FBgn0000064,FBgn0002868,FBgn0002869,FBgn0003053,FBgn0004611,FBgn0004647,FBgn0004654,FBgn0034999,FBgn0035432,FBgn0036279,FBgn0038984,FBgn0040070,FBgn0040309,FBgn0052446,FBgn0053192,FBgn0062413,FBgn0063667,FBgn0263593,FBgn0283680
GO:0006457	protein folding (10)	0.0147474	FBgn0001224,FBgn0001225,FBgn0001230,FBgn0001233,FBgn0029174,FBgn0030345,FBgn0032586,FBgn0032961,FBgn0038145,FBgn0263106
GO:0048878	chemical homeostasis (14)	0.0368725	FBgn0000064,FBgn0002868,FBgn0002869,FBgn0004654,FBgn0034999,FBgn0035432,FBgn0036279,FBgn0038984,FBgn0052446,FBgn0053192,FBgn0062413,FBgn0063667,FBgn0263593,FBgn0283680

## Sheet: Plasmatocytes
Ontology Term Identifier	Item (matches)	p-value	Genes
GO:0071711	basement membrane organization (7)	4.17019e-09	FBgn0000299,FBgn0002526,FBgn0011828,FBgn0016075,FBgn0026562,FBgn0261800,FBgn0267348
GO:0030198	extracellular matrix organization (8)	2.64498e-07	FBgn0000299,FBgn0002526,FBgn0003137,FBgn0011828,FBgn0016075,FBgn0026562,FBgn0261800,FBgn0267348
GO:0043062	extracellular structure organization (8)	1.54256e-06	FBgn0000299,FBgn0002526,FBgn0003137,FBgn0011828,FBgn0016075,FBgn0026562,FBgn0261800,FBgn0267348
GO:0070831	basement membrane assembly (4)	2.74077e-05	FBgn0011828,FBgn0026562,FBgn0261800,FBgn0267348
GO:0045229	external encapsulating structure organization (8)	0.000195971	FBgn0000299,FBgn0002526,FBgn0003137,FBgn0011828,FBgn0016075,FBgn0026562,FBgn0261800,FBgn0267348
GO:0034446	substrate adhesion-dependent cell spreading (4)	0.000383028	FBgn0002526,FBgn0011722,FBgn0261800,FBgn0267348
GO:0031589	cell-substrate adhesion (5)	0.00059738	FBgn0002526,FBgn0011722,FBgn0243514,FBgn0261800,FBgn0267348
GO:0007155	cell adhesion (8)	0.00380035	FBgn0002526,FBgn0004449,FBgn0011722,FBgn0026562,FBgn0026721,FBgn0243514,FBgn0261800,FBgn0267348
GO:0044419	biological process involved in interspecies interaction between organisms (11)	0.0046852	FBgn0001114,FBgn0002526,FBgn0003495,FBgn0014033,FBgn0029167,FBgn0030310,FBgn0036891,FBgn0040102,FBgn0243514,FBgn0259896,FBgn0261800
GO:0022610	biological adhesion (8)	0.00496806	FBgn0002526,FBgn0004449,FBgn0011722,FBgn0026562,FBgn0026721,FBgn0243514,FBgn0261800,FBgn0267348
GO:0085029	extracellular matrix assembly (4)	0.00552619	FBgn0011828,FBgn0026562,FBgn0261800,FBgn0267348
GO:0000904	cell morphogenesis involved in differentiation (10)	0.00860503	FBgn0000578,FBgn0001114,FBgn0002526,FBgn0003495,FBgn0004449,FBgn0011722,FBgn0029881,FBgn0259984,FBgn0261800,FBgn0267348
GO:0033627	cell adhesion mediated by integrin (4)	0.00948749	FBgn0002526,FBgn0011722,FBgn0261800,FBgn0267348
GO:0009605	response to external stimulus (14)	0.0172164	FBgn0000578,FBgn0001114,FBgn0002526,FBgn0003495,FBgn0004449,FBgn0011722,FBgn0014033,FBgn0029167,FBgn0030310,FBgn0036891,FBgn0243514,FBgn0259896,FBgn0259984,FBgn0261800
GO:0009607	response to biotic stimulus (10)	0.0177367	FBgn0001114,FBgn0002526,FBgn0003495,FBgn0014033,FBgn0029167,FBgn0030310,FBgn0036891,FBgn0243514,FBgn0259896,FBgn0261800
GO:0043207	response to external biotic stimulus (10)	0.0177367	FBgn0001114,FBgn0002526,FBgn0003495,FBgn0014033,FBgn0029167,FBgn0030310,FBgn0036891,FBgn0243514,FBgn0259896,FBgn0261800
GO:0051707	response to other organism (10)	0.0177367	FBgn0001114,FBgn0002526,FBgn0003495,FBgn0014033,FBgn0029167,FBgn0030310,FBgn0036891,FBgn0243514,FBgn0259896,FBgn0261800
GO:0000902	cell morphogenesis (10)	0.0443686	FBgn0000578,FBgn0001114,FBgn0002526,FBgn0003495,FBgn0004449,FBgn0011722,FBgn0029881,FBgn0259984,FBgn0261800,FBgn0267348
